# Supplementary material for: Analyses of 600+ insect genomes reveal repetitive element dynamics and highlight biodiversity-scale repeat annotation challenges
Source: HighWire-hosted journal article supplement (doi:10.1101/gr.277387.122), 2023-09-22
Supplement: Supplemental_Tables_S1_to_S3.xlsx [file Supplemental_Tables_S1_to_S3.xlsx]

## Sheet: Table S1. Assembly details
Table S1. The complete, curated data set used in this study. Fields with "NA_quality" indicate values that were not calculated due to that assembly falling below the quality filter for the analysis that would have calculated the value in question. Metadata unrelated to repetitive element analyses was acquired from Genbank as of November 2020 as reported in Hotaling et al. (2020). Note that column…
Order	Family	Genus	ID	TreeOrder	Accession	SRA_accession	Tech_coarse	Tech_fine	Assembly_Length	Repeat_BUSCOs	Contig_N50	Log10_N50	BUSCO_Single	BUSCO_Duplicate	BUSCO_Complete	BUSCO_Fragmented	BUSCO_Missing	BUSCO_Sum (Single, Dup, Frag, Missing)	LINEs_bases	LINEs_proportion	SINEs_bases	SINEs_proportion	LTRs_bases	LTRs_proportion	DNA_trans_bases	DNA_trans_proportion	tandem_repeats_bases	tandem_repeats_proportion	other_repeats_bases	other_repeats_proportion	unclassified_bases	unclassified_proportion	unclassified_prop_reps	all_repeats_bases	all_repeats_proportion	prop_all_rep_unclass	assembly_length	unique_low_repeat_bases	unique_low_repeat_proportion	lines_prop_rep	LTR_prop_rep	trans_prop_rep	TIR_bases	crypton_bases	Mav_Pol_bases	Unknown_annotations	mean_unknown_len	median_unknown_len	TE_BUSCOs
Diptera	Drosophilidae	Drosophila	416	43	GCA_000001765.3	NA	long	pacbio	164662283	19	26005469	7.42	95.5	2.4	97.9	1.2	0.9	100	8904121	0.0541	1684	0	15585520	0.0946	2826167	0.0171	7923946	0.0481	5922544	0.0359	5401262	0.0328	0.115993	46565244	0.282792	0.115993	164662283	118097039	0.717208	7.6764e+07	1.34366e+08	2.43649e+07	2546047	20631	259489	28635	198	94	YES
Coleoptera	Tenebrionidae	Tribolium	560	274	GCA_000002335.3	NA	short	short	165928604	15	73049	4.86	98.9	0.4	99.3	0.5	0.2	100	2995173	0.0181	52878	0.0003	1112505	0.0068	15580345	0.0939	1581715	0.0096	1962875	0.0119	23797914	0.1435	0.505442	47083405	0.283757	0.505442	165928604	118845199	0.716243	5.92585e+06	2.20106e+06	3.08252e+07	14402083	338938	839324	123569	204	122	YES
Hymenoptera	Pteromalidae	Nasonia	251	412	GCA_000004775.1	NA	short	short	283606953	2	1971	3.29	94.4	0.7	95.1	1.7	3.2	100	6356630	0.0225	46153	0.0002	7641827	0.027	4555846	0.016	3534174	0.0124	2764044	0.0097	7783379	0.0274	0.238155	32682053	0.115237	0.238155	283606953	250924900	0.884763	2.66912e+07	3.20877e+07	1.91298e+07	1908095	141305	2506446	58183	137	90	YES
Hymenoptera	Pteromalidae	Nasonia	258	413	GCA_000004795.1	NA	short	short	285726340	1	1876	3.27	94.2	0.8	95	1.8	3.2	100	6552726	0.023	26365	0.0001	8317878	0.0291	4982374	0.0174	3495738	0.0122	2982690	0.0104	8199044	0.0287	0.237263	34556815	0.120944	0.237263	285726340	251169525	0.879056	2.7618e+07	3.50577e+07	2.09994e+07	2199825	134580	2647969	64637	132	89	YES
Diptera	Drosophilidae	Drosophila	455	67	GCA_000005155.1	NA	none	none	200467819	5	91192	4.96	96.3	3.1	99.4	0.2	0.4	100	5761509	0.0287	1916	0	24706274	0.1233	2100879	0.0105	21077070	0.1052	3071154	0.0154	5410191	0.027	0.08708	62128993	0.30992	0.08708	200467819	138338826	0.69008	6.61634e+07	2.83719e+08	2.41259e+07	789497	133	1311249	38009	153	86	YES
Diptera	Drosophilidae	Drosophila	450	58	GCA_000005175.1	NA	none	none	193826310	10	121517	5.08	97.8	1.2	99	0.1	0.9	100	5642949	0.0291	2258	0	13843097	0.0714	4035630	0.0208	16958069	0.0874	11013899	0.0568	4835250	0.0249	0.0858362	56331152	0.290627	0.0858362	193826310	137495158	0.709373	6.57409e+07	1.61273e+08	4.70155e+07	4008189	302	27139	35001	151	81	YES
Diptera	Drosophilidae	Drosophila	472	53	GCA_000005925.1	NA	none	none	235516348	13	180217	5.26	97.7	1.8	99.5	0.2	0.3	100	13538735	0.0575	3440	0	38760758	0.1646	7287646	0.0309	10719361	0.0455	11355009	0.0482	9361998	0.0398	0.102849	91026947	0.386499	0.102849	235516348	144489401	0.613501	1.31637e+08	3.76872e+08	7.0858e+07	7211539	235	75872	49452	198	114	YES
Diptera	Drosophilidae	Drosophila	419	30	GCA_000005975.1	NA	none	none	165693946	3	115562	5.06	96.1	2.9	99	0.4	0.6	100	7531969	0.0455	16271	0.0001	21657139	0.1307	3120179	0.0189	5628568	0.034	5777152	0.0348	1780692	0.0107	0.0391258	45511970	0.274675	0.0391258	165693946	120181976	0.725325	1.92506e+08	5.53526e+08	7.97474e+07	2339080	15240	765859	9858	191	117	YES
Phthiraptera	Pediculidae	Pediculus	15	460	GCA_000006295.1	NA	none	none	110781312	3	34097	4.53	96.9	0.1	97	1	2	100	1080229	0.0097	59109	0.0005	111233	0.001	341450	0.0031	19756183	0.1784	361356	0.0032	5234712	0.0473	0.194279	26944272	0.24322	0.194279	110781312	83837040	0.75678	5.56019e+06	572542	1.75752e+06	325934	111	15405	50023	111	86	YES
Hymenoptera	Formicidae	Atta	274	356	GCA_000143395.2	NA	short	short	317671980	15	14798	4.17	97.2	0.1	97.3	1	1.7	100	4835612	0.0152	1210	0	4097275	0.0129	32671718	0.1028	10387964	0.0327	4181403	0.0131	35042518	0.1104	0.384164	91217700	0.287127	0.384164	317690795	226473095	0.712873	1.25874e+07	1.06654e+07	8.50464e+07	27676764	424810	4570144	228690	164	121	YES
Diptera	Cecidomyiidae	Mayetiola	443	117	GCA_000149185.1	NA	short	short	185827756	3	14032	4.15	94	1.2	95.2	2.4	2.4	100	498351	0.0026	1726	0	1132295	0.0061	1962829	0.0106	5884206	0.0316	381980	0.002	13124473	0.0706	0.57098	22985860	0.123694	0.57098	185827756	162841896	0.876306	872799	1.98307e+06	3.43765e+06	1690093	262	272474	87316	164	116	YES
Hemiptera	Reduviidae	Rhodnius	352	491	GCA_000181055.3	NA	short	short	706824083	94	35751	4.55	95.1	0.7	95.8	2	2.2	100	53795416	0.0761	11974607	0.0169	4225946	0.006	79382923	0.1123	19856300	0.0282	37028118	0.0523	35641319	0.0504	0.147336	241904629	0.342242	0.147336	706824083	464919454	0.657758	3.6512e+08	2.86823e+07	5.38787e+08	76590570	2039178	753175	205169	186	111	YES
Hymenoptera	Apidae	Apis	205	341	GCA_000184785.2	NA	short	short	228997396	1	24915	4.4	98	0	98	1.2	0.8	100	208133	0.0009	1931	0	538312	0.0024	943396	0.0041	11607573	0.0506	26034	0.0001	6933458	0.0303	0.342244	20258837	0.0884675	0.342244	228997396	208738559	0.911532	608143	1.57289e+06	2.7565e+06	938237	231	4928	40414	182	129	YES
Hymenoptera	Formicidae	Pogonomyrmex	210	380	GCA_000187915.1	NA	short	short	235645958	9	11605	4.06	96.3	0.3	96.6	2.3	1.1	100	2265015	0.0097	8273	0	9656035	0.041	14133746	0.06	8642772	0.0367	2225123	0.0093	7141023	0.0303	0.162031	44071987	0.187026	0.162031	235645958	191573971	0.812974	1.39789e+07	5.95938e+07	8.72287e+07	8228539	43267	5861940	41878	177	125	YES
Hymenoptera	Apidae	Bombus	228	306	GCA_000188095.4	NA	short	short	246856484	4	59072	4.77	99.4	0.1	99.5	0.1	0.4	100	3520390	0.0143	2391	0	4248763	0.0172	6111094	0.0248	5245923	0.0212	194290	0.0008	18528251	0.0751	0.489504	37851102	0.153332	0.489504	246856484	209005382	0.846668	7.19175e+06	8.67974e+06	1.24843e+07	6093839	1600	15655	118224	163	130	YES
Hymenoptera	Formicidae	Acromyrmex	266	358	GCA_000204515.1	NA	short	short	295944863	9	80630	4.91	98.2	0.5	98.7	0.9	0.4	100	6610359	0.0224	125646	0.0004	6171812	0.0209	35836771	0.1211	8015780	0.0271	5428541	0.0184	34615828	0.117	0.357584	96804737	0.327104	0.357584	295944863	199140126	0.672896	1.84862e+07	1.72598e+07	1.00219e+08	30668300	289165	4879306	228227	162	121	YES
Diptera	Culicidae	Culex	529	154	GCA_000209185.1	NA	none	none	579042118	119	28546	4.46	91.9	3.8	95.7	1.4	2.9	100	25643852	0.0443	12432562	0.0214	20241956	0.0349	157462903	0.2719	16471697	0.0284	6977828	0.0121	81928140	0.1415	0.255102	321158938	0.554638	0.255102	579042118	257883180	0.445362	1.00524e+08	7.93486e+07	6.17256e+08	152826255	4632855	3793	381265	228	140	YES
Diptera	Culicidae	Anopheles	383	151	GCA_000211455.3	NA	short	short	136935538	2	115072	5.06	97.6	1.1	98.7	0.3	1	100	308796	0.0023	270	0	110710	0.0008	884798	0.0064	4743512	0.0345	102532	0.0008	1625567	0.0119	0.209044	7776185	0.0567872	0.209044	136935538	129159353	0.943213	1.47718e+06	529601	4.23259e+06	880985	127	3686	13791	122	78	YES
Hymenoptera	Apidae	Bombus	231	308	GCA_000214255.1	NA	short	short	248654244	2	76043	4.88	98.7	0.2	98.9	0.7	0.4	100	2720929	0.0109	13214	0	2577371	0.0104	6355626	0.0256	4695420	0.0188	276476	0.001	16533815	0.0665	0.498414	33172851	0.13341	0.498414	248654244	215481393	0.86659	5.45917e+06	5.17114e+06	1.27517e+07	4926337	757	1428532	106169	161	132	YES
Hymenoptera	Formicidae	Linepithema	190	388	GCA_000217595.1	NA	short	short	219500750	5	35858	4.55	98.5	0.6	99.1	0.3	0.6	100	2768839	0.0127	122723	0.0006	4625456	0.0211	8521662	0.0388	5197359	0.0237	1338486	0.006	10974063	0.05	0.32711	33548588	0.15284	0.32711	219500750	185952162	0.84716	8.46456e+06	1.41404e+07	2.60514e+07	7519978	83451	918233	53430	215	136	YES
Diptera	Drosophilidae	Drosophila	397	39	GCA_000220665.2	NA	short	short	152439475	3	275894	5.44	98.2	1	99.2	0.1	0.7	100	4629456	0.0304	3269	0	8454994	0.0555	4773749	0.0314	4978547	0.0327	3951821	0.0259	2940250	0.0193	0.0988915	29732086	0.195042	0.0988915	152439475	122707389	0.804958	4.68135e+07	8.54977e+07	4.82726e+07	4700999	499	72251	12888	241	139	YES
Hymenoptera	Megachilidae	Megachile	244	349	GCA_000220905.1	NA	short	short	272660569	7	64153	4.81	99.6	0.1	99.7	0	0.3	100	1971075	0.0072	48021	0.0002	6176599	0.0227	32237013	0.1182	7326672	0.0268	693303	0.0025	21618455	0.0793	0.308522	70071138	0.25699	0.308522	272660569	202589431	0.74301	6.38878e+06	2.002e+07	1.04489e+08	32225592	649	10772	118518	194	145	YES
Diptera	Drosophilidae	Drosophila	424	36	GCA_000224195.2	NA	short	short	171267669	3	212818	5.33	99	0.4	99.4	0.1	0.5	100	5892588	0.0344	34788	0.0002	17606142	0.1028	2385696	0.0139	5181529	0.0304	1725492	0.0101	6125094	0.0358	0.15725	38951329	0.22743	0.15725	171267669	132316340	0.77257	3.74728e+07	1.11963e+08	1.51714e+07	1937803	15639	432254	34480	194	123	YES
Diptera	Drosophilidae	Drosophila	418	15	GCA_000224215.2	NA	short	short	164292578	12	209056	5.32	98	1.2	99.2	0.1	0.7	100	7269537	0.0442	13602	0.0001	10942372	0.0666	6458185	0.0393	5755258	0.0351	5456658	0.0331	4361886	0.0266	0.10835	40257498	0.245035	0.10835	164292578	124035080	0.754965	6.70933e+07	1.00991e+08	5.9605e+07	6076910	162	381113	21037	220	133	YES
Diptera	Drosophilidae	Drosophila	436	35	GCA_000224235.2	NA	short	short	182106768	8	126259	5.1	98.1	1.4	99.5	0.1	0.4	100	6657075	0.0365	716666	0.0039	12066857	0.0662	7864063	0.0432	5350804	0.0293	9077093	0.0499	16196240	0.0889	0.279589	57928798	0.318103	0.279589	182106768	124177970	0.681897	2.38102e+07	4.31593e+07	2.81273e+07	7402062	4786	457215	65515	256	151	YES
Diptera	Drosophilidae	Drosophila	417	41	GCA_000236285.2	NA	short	short	167263958	11	149088	5.17	97.7	1.1	98.8	0.1	1.1	100	12068054	0.0722	2442	0	14499360	0.0866	7941310	0.0474	4937828	0.0295	7850219	0.0469	4279773	0.0256	0.0829751	51578986	0.308369	0.0829751	167263958	115684972	0.691631	1.45442e+08	1.74743e+08	9.57071e+07	7600527	351	340432	21756	213	134	YES
Diptera	Drosophilidae	Drosophila	454	38	GCA_000236305.2	NA	short	short	197375704	8	19484	4.29	96.8	1.8	98.6	0.6	0.8	100	10346579	0.0525	3905	0	22682080	0.115	5774277	0.0293	5125613	0.0259	10733855	0.0544	2515270	0.0128	0.0439874	57181579	0.289709	0.0439874	197375704	140194125	0.710291	2.35217e+08	5.15649e+08	1.31271e+08	5661077	14866	98334	14949	177	106	YES
Diptera	Drosophilidae	Drosophila	408	31	GCA_000236325.2	NA	short	short	156942009	6	224458	5.35	98.6	0.6	99.2	0.2	0.6	100	4714481	0.0301	2804	0	14812535	0.0944	5235590	0.0334	6401448	0.0408	4469756	0.0284	1279027	0.0082	0.0346473	36915641	0.235218	0.0346473	156942009	120026368	0.764782	1.36071e+08	4.27524e+08	1.51111e+08	1834158	62	3401370	8892	154	94	YES
Diptera	Psychodidae	Phlebotomus	498	123	GCA_000262795.1	NA	short	short	363767980	0	5795	3.76	80.5	3.5	84	10.5	5.5	100	5827538	0.016	653762	0.0018	7924423	0.0218	15702532	0.0431	2574255	0.007	3809546	0.0104	140408397	0.386	0.793714	176900453	0.4863	NA_quality	363767980	186867527	0.5137	NA_quality	NA_quality	NA_quality	15218998	438	483096	883767	168	131	NO
Diptera	Psychodidae	Lutzomyia	399	122	GCA_000265325.1	NA	short	short	154229266	0	7481	3.87	81.1	5.1	86.2	3.1	10.7	100	494123	0.0032	77642	0.0005	416157	0.0027	2551517	0.0165	4072767	0.0264	1265365	0.0082	14989990	0.0972	0.628049	23867561	0.154754	NA_quality	154229266	130361705	0.845246	NA_quality	NA_quality	NA_quality	2462974	346	88197	90411	179	128	NO
Strepsiptera	Mengenillidae	Mengenilla	10	302	GCA_000281935.1	NA	short	short	155727465	0	4038	3.61	55.4	0.2	55.6	22.5	21.9	100	2680433	0.0172	20867	0.0001	5119233	0.0329	14076859	0.0904	2055013	0.0132	774762	0.0049	51019446	0.3276	0.673554	75746613	0.486405	NA_quality	155727465	79980852	0.513595	NA_quality	NA_quality	NA_quality	14074311	523	2025	292917	184	145	NO
Lepidoptera	Nymphalidae	Heliconius	73	164	GCA_000313835.2	NA	none	none	273786188	41	51027	4.71	95.2	0.4	95.6	1.7	2.7	100	13313557	0.0486	84401	0.0003	2013897	0.0074	7818895	0.0285	5294848	0.0193	61646787	0.2252	3720791	0.0136	0.0396279	93893176	0.342943	0.0396279	273786188	179893012	0.657057	3.35964e+08	5.08202e+07	1.97308e+08	7793694	381	24820	24306	158	102	YES
Diptera	Phoridae	Megaselia	521	NA_quality	GCA_000341915.2	NA	none	none	489347612	8.69	931	2.97	27.7	0	27.7	21.9	50.4	100	76982076	0.1574	1276	0	7128279	0.0146	3803451	0.0078	5650456	0.0114	443801	0.0009	69767827	0.1426	NA_quality	163777166	0.334685	NA_quality	489347612	325570446	0.665315	NA_quality	NA_quality	NA_quality	3792312	336	10803	793609	98	79	NA_quality
Hymenoptera	Cephidae	Cephus	164	411	GCA_000341935.1	NA	short	short	162226239	3	44905	4.65	99	0.3	99.3	0.3	0.4	100	873778	0.0054	46867	0.0003	1709180	0.0106	4382725	0.027	3474469	0.0214	652929	0.004	12508254	0.0771	0.52893	23648202	0.145773	0.52893	162226239	138578037	0.854227	1.65197e+06	3.23139e+06	8.28601e+06	2212224	70524	2099977	50375	259	159	YES
Hymenoptera	Tenthredinidae	Athalia	161	459	GCA_000344095.2	NA	short	short	155841210	2	571016	5.76	99.5	0.2	99.7	0	0.3	100	202050	0.0013	3214	0	2404666	0.0154	897694	0.0057	5909172	0.0378	148482	0.0009	3427159	0.022	0.263781	12992437	0.0833697	0.263781	155841210	142848773	0.91663	765976	9.11614e+06	3.40318e+06	721897	4723	171074	21753	166	91	YES
Coleoptera	Curculionidae	Dendroctonus	566	261	GCA_000346045.2	NA	short	short	261333785	12	10101	4	91.6	5.5	97.1	1.7	1.2	100	6889085	0.0263	8254	0	2878154	0.011	8309875	0.0318	946816	0.0037	2193224	0.0083	31150079	0.1192	0.594745	52375487	0.200416	0.594745	261333785	208958298	0.799584	1.15833e+07	4.8393e+06	1.39722e+07	8267863	37813	4199	164823	201	128	YES
Hymenoptera	Halictidae	Lasioglossum	285	350	GCA_000346575.1	NA	short	short	336521443	32	16944	4.23	96.7	1.7	98.4	0.9	0.7	100	2699150	0.008	162170	0.0005	3134597	0.0093	26270998	0.078	4437172	0.0132	936660	0.0029	55064906	0.1637	0.593976	92705653	0.275482	0.593976	336521443	243815790	0.724518	4.54421e+06	5.27732e+06	4.42291e+07	26111256	7842	151900	451592	133	100	YES
Diptera	Tephritidae	Ceratitis	512	84	GCA_000347755.4	NA	short	short	436474819	27	845931	5.93	99.3	0.1	99.4	0.1	0.5	100	54154837	0.124	4837721	0.0111	10672462	0.0245	60707840	0.1391	24753923	0.0566	4501745	0.0102	31268571	0.0717	0.163798	190897099	0.437361	0.163798	436474819	245577720	0.562639	3.3062e+08	6.51562e+07	3.70626e+08	60066525	1867	639448	240710	142	95	YES
Diptera	Culicidae	Anopheles	456	136	GCA_000349025.1	NA	short	short	201793324	3	123292	5.09	99	0.6	99.6	0.1	0.3	100	3048767	0.0151	1519615	0.0075	1159311	0.0057	1626181	0.0081	2415838	0.0119	216843	0.001	2799151	0.0138	0.218928	12785706	0.0633604	0.218928	201793324	189007618	0.93664	1.39259e+07	5.29539e+06	7.42792e+06	1621233	316	4632	20011	144	101	YES
Diptera	Culicidae	Anopheles	482	129	GCA_000349065.1	NA	short	short	283828998	20	39415	4.6	98	0.7	98.7	0.5	0.8	100	3357666	0.0118	1485686	0.0052	1853532	0.0066	8036509	0.0283	6689398	0.0236	224828	0.0008	5723507	0.0201	0.209107	27371126	0.0964353	0.209107	283828998	256457872	0.903565	1.60571e+07	8.86402e+06	3.84324e+07	8009184	173	27152	35916	166	118	YES
Diptera	Culicidae	Anopheles	470	135	GCA_000349105.1	NA	short	short	223486714	10	88996	4.95	98.6	0.7	99.3	0.2	0.5	100	4547414	0.0204	1170373	0.0052	2294291	0.0102	3087164	0.0138	3587237	0.016	76951	0.0003	4070541	0.0182	0.216128	18833971	0.0842733	0.216128	223486714	204652743	0.915727	2.10404e+07	1.06154e+07	1.4284e+07	3082155	401	4608	29338	143	101	YES
Diptera	Culicidae	Anopheles	466	144	GCA_000349145.1	NA	short	short	216307690	4	76300	4.88	98.4	0.9	99.3	0	0.7	100	2918771	0.0135	306547	0.0014	1441217	0.0066	1651674	0.0076	4244693	0.0195	48281	0.0001	6230915	0.0288	0.369961	16842098	0.0778618	0.369961	216307690	199465592	0.922138	7.88941e+06	3.89559e+06	4.46446e+06	1645134	316	6224	43237	149	107	YES
Diptera	Culicidae	Anopheles	427	134	GCA_000349165.1	NA	short	short	172658580	1	8461	3.93	97	0.7	97.7	1	1.3	100	1182987	0.0069	874954	0.005	898738	0.0052	1446689	0.0084	3274691	0.0188	66894	0.0003	1319633	0.0076	0.145581	9064586	0.0525001	0.145581	172658580	163593994	0.9475	8.12596e+06	6.17345e+06	9.93734e+06	1440958	472	5259	10866	125	87	YES
Diptera	Culicidae	Anopheles	476	128	GCA_000349185.1	NA	short	short	246567867	27	74117	4.87	98.4	0.9	99.3	0.3	0.4	100	3603300	0.0146	1447864	0.0059	2664563	0.0108	7968526	0.0323	6839491	0.0278	249167	0.001	6350771	0.0257	0.218062	29123682	0.118116	0.218062	246567867	217444185	0.881884	1.65242e+07	1.22193e+07	3.65425e+07	7961900	180	6446	38093	172	114	YES
Odonata	Libellulidae	Ladona	34	528	GCA_000376725.2	NA	short	short	1157615891	125	67260	4.83	93.9	1.8	95.7	2.3	2	100	75822170	0.0655	7435204	0.0064	4282842	0.0037	54698470	0.0473	8570893	0.0074	14258189	0.0123	151483749	0.1309	0.478544	316551517	0.273451	0.478544	1157615891	841064374	0.726549	1.58444e+08	8.94974e+06	1.14302e+08	54323810	1141	373519	921575	177	126	YES
Coleoptera	Cerambycidae	Anoplophora	582	271	GCA_000390285.2	NA	short	short	706952781	89	80490	4.91	96.6	1.9	98.5	0.8	0.7	100	26007234	0.0368	38495	0	9267737	0.0131	143784321	0.2034	4988745	0.0071	4635611	0.0066	206240977	0.2917	0.522178	394963120	0.558684	0.522178	706952781	311989661	0.441316	4.98053e+07	1.77482e+07	2.75355e+08	132465298	8897092	2421931	1019177	214	136	YES
Diptera	Culicidae	Anopheles	375	146	GCA_000439205.1	NA	short	short	98320046	0	2278	3.36	69.1	0.6	69.7	12.4	17.9	100	325076	0.0033	31402	0.0003	247742	0.0026	89905	0.0009	1137016	0.0116	28392	0.0002	573822	0.0059	0.235815	2433355	0.0247493	NA_quality	98320046	95886691	0.975251	NA_quality	NA_quality	NA_quality	86698	161	3046	4388	133	102	NO
Diptera	Culicidae	Anopheles	465	148	GCA_000441895.2	NA	short	short	220777669	13	30137	4.48	96.8	1.2	98	0.6	1.4	100	1451434	0.0066	396696	0.0018	1602399	0.0072	5697152	0.0258	2509611	0.0113	347778	0.0015	9899586	0.0448	0.45194	21904656	0.0992159	0.45194	220777669	198873013	0.900784	3.21156e+06	3.5456e+06	1.2606e+07	5693596	380	3176	49600	204	142	YES
Diptera	Culicidae	Anopheles	457	137	GCA_000473375.1	NA	short	short	202998806	5	13414	4.13	97.1	1.6	98.7	0.6	0.7	100	2451890	0.012	2085314	0.0103	600812	0.003	1549390	0.0076	2643140	0.013	188921	0.0009	3705101	0.0182	0.280168	13224568	0.065146	0.280168	202998806	189774238	0.934854	8.7515e+06	2.14447e+06	5.53022e+06	1545283	298	3809	26136	146	107	YES
Diptera	Culicidae	Anopheles	437	141	GCA_000473445.2	NA	short	short	183103254	1	161110	5.21	98.5	0.9	99.4	0.1	0.5	100	1387748	0.0076	148175	0.0008	615280	0.0034	304391	0.0017	3485780	0.0189	26366	0.0001	1345371	0.0073	0.183967	7313111	0.0399398	0.183967	183103254	175790143	0.96006	7.54346e+06	3.34451e+06	1.6546e+06	299052	263	5076	9978	136	96	YES
Diptera	Culicidae	Anopheles	469	147	GCA_000473505.1	NA	short	short	224290125	5	53613	4.73	98.5	1.1	99.6	0.1	0.3	100	1538896	0.0068	280805	0.0012	1587996	0.0071	1086651	0.0049	2744715	0.0122	676008	0.0029	3599751	0.016	0.312619	11514822	0.051339	0.312619	224290125	212775303	0.948661	4.92259e+06	5.07965e+06	3.47596e+06	1064673	18650	3328	22786	163	114	YES
Diptera	Culicidae	Anopheles	468	131	GCA_000473525.2	NA	short	short	224162116	10	11312	4.05	91.6	4.8	96.4	1.5	2.1	100	2401567	0.0107	1362966	0.0061	1227741	0.0054	6260826	0.0279	6203169	0.0277	145145	0.0006	5310288	0.0237	0.231772	22911702	0.10221	0.231772	224162116	201250414	0.89779	1.03618e+07	5.2972e+06	2.70129e+07	6225803	257	34766	36293	151	114	YES
Diptera	Culicidae	Anopheles	485	132	GCA_000473845.2	NA	short	short	288048996	21	48115	4.68	98	1	99	0.4	0.6	100	4450074	0.0155	1988412	0.0069	3812944	0.0132	9185443	0.0319	6742665	0.0234	271481	0.0009	7388650	0.0256	0.218343	33839669	0.117479	0.218343	288048996	254209327	0.882521	2.03811e+07	1.74631e+07	4.20689e+07	9170313	142	14988	43234	175	121	YES
Hemiptera	Liviidae	Diaphorina	345	484	GCA_000475195.1	NA	long	pacbio	485705082	0	34407	4.54	81.4	4.5	85.9	6.9	7.2	100	7059411	0.0145	22136192	0.0456	3387244	0.007	7036477	0.0145	22321326	0.0459	12127973	0.025	68124853	0.1403	0.4791	142193476	0.292757	NA_quality	485705082	343511606	0.707243	NA_quality	NA_quality	NA_quality	6990654	368	45455	775576	96	75	NO
Coleoptera	Chrysomelidae	Leptinotarsa	581	269	GCA_000500325.2	NA	short	short	641992784	166	46596	4.67	91.7	0.9	92.6	3.8	3.6	100	141480664	0.2203	1430919	0.0022	13072697	0.0204	89167327	0.1389	2906433	0.0045	45759293	0.0713	120297317	0.1874	0.290493	414114650	0.645046	0.290493	641992784	227878134	0.354954	4.87037e+08	4.50018e+07	3.06952e+08	80771603	2525522	5870202	838669	156	115	YES
Hymenoptera	Agaonidae	Ceratosolen	250	429	GCA_000503995.1	NA	short	short	277059195	7	74702	4.87	97.2	0.3	97.5	1	1.5	100	112282	0.0004	1274	0	1085296	0.0039	378998	0.0013	19510497	0.0704	134686	0.0004	6169504	0.0222	0.225226	27392537	0.0988689	0.225226	277059195	249666658	0.901131	498531	4.8187e+06	1.68275e+06	350710	1016	27272	36090	187	99	YES
Ephemeroptera	Ephemeridae	Ephemera	368	531	GCA_000507165.2	NA	short	short	474347418	97	55305	4.74	94.3	2.6	96.9	1	2.1	100	7994072	0.0169	120672	0.0002	1664209	0.0035	6069762	0.0128	7180515	0.0151	684590	0.0013	129093056	0.2722	0.844812	152806876	0.322141	0.844812	474347418	321540542	0.677859	9.46255e+06	1.96992e+06	7.18475e+06	5170918	192251	706593	885499	159	124	YES
Orthoptera	Acrididae	Locusta	33	NA_quality	GCA_000516895.1	NA	short	short	5759798599	9.76	9587	3.98	32	1.6	33.6	34.8	31.6	100	1426204743	0.2476	320493901	0.0557	362865606	0.063	1180289654	0.2049	47581132	0.0082	713407366	0.1238	530223030	0.0921	NA_quality	4581065432	0.795352	NA_quality	5759798599	1178733167	0.204648	NA_quality	NA_quality	NA_quality	1153657539	2869	26629246	3004152	186	126	NA_quality
Hymenoptera	Braconidae	Microplitis	213	452	GCA_000572035.2	NA	short	short	241190213	12	14116	4.15	98.2	1.2	99.4	0.2	0.4	100	2533353	0.0105	594625	0.0025	7210129	0.0299	15198406	0.063	9898340	0.041	2042374	0.0085	52964624	0.2196	0.585621	90441851	0.374981	0.585621	241190213	150748362	0.625019	4.32593e+06	1.23119e+07	2.59526e+07	12468365	581700	2148341	271896	213	144	YES
Hymenoptera	Trichogrammatidae	Trichogramma	170	434	GCA_000599845.3	NA	short	short	187641947	6	573774	5.76	95.5	2.6	98.1	0.2	1.7	100	4325503	0.0231	76974	0.0004	3047192	0.0162	3582668	0.0191	5631070	0.0301	476160	0.0026	18012258	0.096	0.512413	35151825	0.187335	0.512413	187641947	152490122	0.812665	8.44144e+06	5.94675e+06	6.99176e+06	2913787	464358	204523	78372	245	142	YES
Hymenoptera	Orussidae	Orussus	172	410	GCA_000612105.2	NA	short	short	186398216	15	508621	5.71	98	0.4	98.4	0.7	0.9	100	553307	0.003	151769	0.0008	1524602	0.0082	4788055	0.0257	1920421	0.0103	406835	0.0022	31392345	0.1684	0.770604	40737334	0.21855	0.770604	186398216	145660882	0.78145	718017	1.97845e+06	6.21338e+06	4289106	26351	472598	156026	210	141	YES
Hymenoptera	Encyrtidae	Copidosoma	305	431	GCA_000648655.2	NA	short	short	553956141	23	40744	4.61	92.9	2.5	95.4	1.2	3.4	100	18128752	0.0327	207808	0.0004	40918068	0.0739	37261724	0.0673	9930160	0.018	19999910	0.036	116753734	0.2108	0.480073	243200156	0.439024	0.480073	553956141	310755985	0.560976	3.77625e+07	8.52331e+07	7.76169e+07	20257941	634680	16369103	416545	299	192	YES
Hemiptera	Cimicidae	Cimex	346	487	GCA_000648675.3	NA	short	short	510833625	64	552423	5.74	98.2	1.2	99.4	0.3	0.3	100	91024994	0.1782	7887118	0.0154	8365615	0.0164	36235229	0.0709	9476000	0.0185	28199361	0.0551	69012322	0.1351	0.275828	250200639	0.489789	0.275828	510833625	260632986	0.510211	3.30006e+08	3.03291e+07	1.31369e+08	35920432	698	314099	477417	164	116	YES
Coleoptera	Scarabaeidae	Onthophagus	567	289	GCA_000648695.2	NA	short	short	267079363	48	101202	5.01	96.7	2.8	99.5	0.1	0.4	100	23955763	0.0897	3064	0	5118033	0.0192	30107389	0.1127	2739521	0.0102	4435850	0.0167	54669087	0.2047	0.451703	121028707	0.453156	0.451703	267079363	146050656	0.546844	5.30343e+07	1.13305e+07	6.6653e+07	29265436	170820	671133	246932	251	145	YES
Trichoptera	Limnephilidae	Limnephilus	6	259	GCA_000648945.2	NA	short	short	1369180260	0	24277	4.39	81.2	5.2	86.4	7.3	6.3	100	155225397	0.1134	29268648	0.0214	4651466	0.0034	81197730	0.0593	13453621	0.0098	63471990	0.0463	441223916	0.3222	0.559579	788492768	0.575887	NA_quality	1369180260	580687492	0.424113	NA_quality	NA_quality	NA_quality	80707617	471090	19023	2921213	165	120	NO
Diptera	Glossinidae	Glossina	503	104	GCA_000671735.1	NA	short	short	374774708	15	64354	4.81	96.7	2.5	99.2	0.2	0.6	100	22399607	0.0598	1731	0	4732253	0.0126	20584753	0.0549	14358298	0.0382	24306475	0.0648	34607776	0.0924	0.286036	120990893	0.322836	0.286036	374774708	253783815	0.677164	7.83104e+07	1.65442e+07	7.19656e+07	19568008	907	1015838	229971	169	122	YES
Diptera	Glossinidae	Glossina	491	106	GCA_000671755.1	NA	short	short	315360362	8	62009	4.79	96.4	2.4	98.8	0.7	0.5	100	9932608	0.0315	25610	0.0001	1074349	0.0034	23236872	0.0737	15276683	0.0484	14362934	0.0455	19569241	0.0621	0.234423	83478297	0.264708	0.234423	315360362	231882065	0.735292	4.23704e+07	4.58295e+06	9.91236e+07	23069318	622	166932	135068	160	112	YES
Diptera	Glossinidae	Glossina	497	102	GCA_000688715.1	NA	short	short	357332231	2	167200	5.22	97.5	2	99.5	0.1	0.4	100	19458638	0.0544	343075	0.001	4953440	0.0138	22592769	0.0632	12186352	0.0341	23766812	0.0664	34046302	0.0953	0.290133	117347388	0.328399	0.290133	357332231	239984843	0.671601	6.70681e+07	1.7073e+07	7.78705e+07	21516641	1169	1074959	238905	159	118	YES
Diptera	Glossinidae	Glossina	502	103	GCA_000688735.1	NA	short	short	370264922	9	45924	4.66	97	2.3	99.3	0.1	0.6	100	18915566	0.0511	797481	0.0022	4161559	0.0112	24126497	0.0652	14326571	0.0387	24910651	0.0673	33900670	0.0916	0.279849	121138995	0.327168	0.279849	370264922	249125927	0.672832	6.7592e+07	1.48707e+07	8.62124e+07	23137768	809	987920	238927	160	121	YES
Diptera	Tephritidae	Bactrocera	524	81	GCA_000695345.1	NA	short	short	519005690	27	7868	3.9	93.1	0.3	93.4	2	4.6	100	45847935	0.0883	3151	0	9840312	0.019	64187900	0.1237	7950114	0.0154	14086375	0.0271	31365503	0.0604	0.181009	173281290	0.333872	0.181009	519005690	345724400	0.666128	2.53291e+08	5.43636e+07	3.54611e+08	64168631	1305	17964	240884	143	96	YES
Blattodea	Termopsidae	Zootermopsis	597	519	GCA_000696155.1	NA	short	short	485009472	80	22794	4.36	98	0.4	98.4	0.7	0.9	100	33554596	0.0692	17373349	0.0358	938838	0.0019	21435571	0.0442	3755328	0.0077	20737053	0.0428	60280333	0.1243	0.38134	158075068	0.325922	0.38134	485009472	326934404	0.674078	8.79913e+07	2.46195e+06	5.62112e+07	21417069	583	17919	489161	137	108	YES
Hemiptera	Lygaeidae	Oncopeltus	358	496	GCA_000696205.2	NA	short	short	1099611736	289	11156	4.05	92.1	1.7	93.8	3.4	2.8	100	83837527	0.0763	4347795	0.004	8460038	0.0077	26973386	0.0245	27678669	0.0251	25814459	0.0235	183949008	0.1673	0.509468	361060882	0.328353	0.509468	1099611736	738550854	0.671647	1.64559e+08	1.66056e+07	5.29442e+07	26483807	27764	461815	1334237	154	123	YES
Hemiptera	Pentatomidae	Halyomorpha	360	493	GCA_000696795.3	NA	short	short	1150087594	96	17705	4.25	96	1.3	97.3	1	1.7	100	150737280	0.1311	13356514	0.0116	17310519	0.0151	54168637	0.0471	16450735	0.0142	42046224	0.0366	251057182	0.2183	0.460548	545127091	0.473987	0.460548	1150087594	604960503	0.526013	3.273e+08	3.75868e+07	1.17618e+08	53910168	41895	216574	1523751	178	133	YES
Hemiptera	Cicadellidae	Homalodisca	363	501	GCA_000696855.2	NA	short	short	1445215006	134	46532	4.67	90.8	1.3	92.1	4.8	3.1	100	64795410	0.0448	1011364	0.0007	2845385	0.0019	55725139	0.0386	15694633	0.0108	35253290	0.0245	217280203	0.1503	0.553431	392605424	0.271659	0.553431	1445215006	1052609582	0.728341	1.17079e+08	5.14135e+06	1.0069e+08	53867154	51539	1806446	1269591	182	136	YES
Thysanoptera	Thripidae	Frankliniella	9	502	GCA_000697945.4	NA	short	short	415771118	6	6158	3.79	96.6	1.3	97.9	1	1.1	100	1033571	0.0025	369803	0.0009	1866690	0.0045	4763964	0.0115	11119997	0.0267	980096	0.0023	36957861	0.0889	0.647339	57091982	0.137316	0.647339	415771118	358679136	0.862684	1.59665e+06	2.88364e+06	7.3593e+06	4199723	53	564188	229091	168	127	YES
Coleoptera	Buprestidae	Agrilus	571	299	GCA_000699045.2	NA	short	short	353056831	45	28329	4.45	91.1	6.6	97.7	0.5	1.8	100	31257925	0.0885	348466	0.001	11178891	0.0317	27506634	0.0779	2813247	0.008	7099865	0.0201	50686543	0.1436	0.387241	130891571	0.370738	0.387241	353056831	222165260	0.629262	8.07196e+07	2.88681e+07	7.10324e+07	26046757	1650	1458227	313855	172	113	YES
Diptera	Calliphoridae	Lucilia	505	89	GCA_000699065.2	NA	short	short	378274262	42	94823	4.98	98.8	0.4	99.2	0.4	0.4	100	20561505	0.0543	92373	0.0002	10798686	0.0285	12285306	0.0325	18502064	0.0488	21977735	0.0581	72296207	0.1912	0.461916	156513876	0.413758	0.461916	378274262	221760386	0.586242	4.45136e+07	2.3378e+07	2.65964e+07	10248742	5976	2030588	428322	196	125	YES
Lepidoptera	Nymphalidae	Melitaea	103	189	GCA_000716385.1	NA	short	short	389892349	0	13489	4.13	82.3	0.1	82.4	9.7	7.9	100	30375232	0.0779	18835169	0.0483	1490690	0.0038	9681260	0.0248	6058666	0.0155	36986740	0.0948	35141145	0.0901	0.253601	138568902	0.355389	NA_quality	389907520	251338618	0.644611	NA_quality	NA_quality	NA_quality	9370264	41743	269253	266944	145	112	NO
Blattodea	Ectobiidae	Blattella	600	521	GCA_000762945.2	NA	short	short	1796331457	268	71964	4.86	93.5	2.3	95.8	1.8	2.4	100	159953608	0.089	59329811	0.033	6245064	0.0035	257055454	0.1431	26961007	0.015	43604625	0.0243	552977168	0.3079	0.499922	1106126737	0.61577	0.499922	1796331457	690204720	0.38423	3.19957e+08	1.24921e+07	5.14191e+08	236870245	20047759	137450	2903570	200	141	YES
Diptera	Chironomidae	Belgica	372	161	GCA_000775305.1	SRR536774	long	pacbio	89567811	2	13715	4.14	96.6	0.7	97.3	1.4	1.3	100	261271	0.003	876	0	289214	0.0032	260716	0.0029	373008	0.0042	15530	0.0002	1734776	0.0194	0.590986	2935391	0.032767	0.590986	89583723	86648332	0.967233	442093	489375	441154	254282	310	6124	12093	148	106	YES
Hemiptera	Pentatomidae	Piezodorus	320	NA_quality	GCA_000786065.1	NA	short	short	3179848	6.5	1459	3.16	0.2	0	0.2	0.1	99.7	100	642588	0.202	35404	0.0111	258075	0.0811	69155	0.0218	48981	0.0155	53567	0.017	198097	0.0623	NA_quality	1305867	0.41067	NA_quality	3179848	1873981	0.58933	NA_quality	NA_quality	NA_quality	45876	0	23279	1084	191	98	NA_quality
Diptera	Chironomidae	Chironomus	462	158	GCA_000786525.1	NA	none	none	213462749	3	7697	3.89	94.4	2	96.4	1.5	2.1	100	602287	0.0028	91189	0.0004	446133	0.0021	4875558	0.0228	3370646	0.0158	512165	0.0023	10833550	0.0508	0.522564	20731528	0.0971201	0.522564	213462749	192731221	0.90288	1.15256e+06	853739	9.33007e+06	4870013	464	5081	118665	98	78	YES
Diptera	Tephritidae	Bactrocera	508	80	GCA_000789215.2	NA	short	short	414968693	6	4913	3.69	95.8	0.2	96	1.4	2.6	100	26262755	0.0633	2827	0	2512576	0.006	30903392	0.0744	7444956	0.018	10556067	0.0254	13292585	0.032	0.146112	90975158	0.219234	0.146112	414968693	323993535	0.780766	1.79744e+08	1.71962e+07	2.11504e+08	30854616	29288	19488	126563	115	80	YES
Diptera	Tephritidae	Zeugodacus	501	83	GCA_000806345.1	NA	short	short	374804520	27	17360	4.24	98.7	0.3	99	0.4	0.6	100	17543631	0.0468	3967	0	2327863	0.0062	24319977	0.0649	9059969	0.0242	7467922	0.0199	25539285	0.0681	0.296064	86262614	0.230154	0.296064	374804520	288541906	0.769846	5.92561e+07	7.86269e+06	8.21442e+07	24305525	345	14107	152932	181	112	YES
Hymenoptera	Braconidae	Fopius	162	451	GCA_000806365.1	NA	short	short	153631861	8	51867	4.71	96.6	0.1	96.7	1.3	2	100	2099712	0.0136	277051	0.0018	4190416	0.0273	4275944	0.0278	1866938	0.0121	1108519	0.0071	18569491	0.1208	0.573344	32388071	0.210816	0.573344	153631861	121243790	0.789184	3.66222e+06	7.30874e+06	7.45791e+06	1625374	166974	2483596	84984	229	143	YES
Diptera	Glossinidae	Glossina	504	105	GCA_000818775.1	NA	short	short	380104241	11	24489	4.39	93.9	4.2	98.1	0.5	1.4	100	20422460	0.0537	1556	0	4121096	0.0108	21504021	0.0566	13953124	0.0367	18166086	0.0478	33967978	0.0894	0.302917	112136321	0.295015	0.302917	380104241	267967920	0.704985	6.74194e+07	1.36047e+07	7.09899e+07	20485022	710	1018289	234446	162	121	YES
Hymenoptera	Apidae	Apis	227	336	GCA_000819425.1	NA	short	short	243566977	0	504	2.7	75.6	0.1	75.7	13.6	10.7	100	112324	0.0004	3853	0	559619	0.0023	1871915	0.0077	11973876	0.0492	40717	0.0002	7284961	0.0299	0.33345	21847265	0.0896972	NA_quality	243566977	221719712	0.910303	NA_quality	NA_quality	NA_quality	1861347	644	9924	45954	164	131	NO
Hemiptera	Dactylopiidae	Dactylopius	321	NA_quality	GCA_000833685.1	NA	short	short	18613147	7.27	378999	5.58	2.6	1.8	4.4	0.8	94.8	100	7510	0.0004	3130	0.0002	3287	0.0002	26312	0.0014	114076	0.0062	15562	0.0008	501301	0.0269	NA_quality	671178	0.0360594	NA_quality	18613147	17941969	0.963941	NA_quality	NA_quality	NA_quality	16198	0	10114	2645	191	105	NA_quality
Lepidoptera	Papilionidae	Papilio	53	215	GCA_000836215.1	NA	short	short	227005758	33	47768	4.68	92.8	0.4	93.2	3	3.8	100	11367511	0.0501	2213381	0.0098	793248	0.0035	2546887	0.0112	2242498	0.0098	26413047	0.1163	10596549	0.0467	0.188641	56173121	0.247452	0.188641	227005758	170832637	0.752548	6.026e+07	4.20507e+06	1.35012e+07	2543556	114	3217	91656	119	108	YES
Lepidoptera	Papilionidae	Papilio	97	217	GCA_000931545.1	NA	short	short	374815656	64	12225	4.09	93.5	0.9	94.4	2.3	3.3	100	45172508	0.1205	3831807	0.0103	2043669	0.0054	6831273	0.0182	3677612	0.0098	22341979	0.0596	30668938	0.0818	0.267693	114567786	0.305664	0.267693	374815656	260247870	0.694336	1.68748e+08	7.63439e+06	2.55191e+07	6807204	325	23744	274373	120	92	YES
Hymenoptera	Formicidae	Vollenhovia	262	372	GCA_000949405.1	NA	short	short	287900827	15	32417	4.51	98.9	0.4	99.3	0.2	0.5	100	4641538	0.0161	62145	0.0002	9042640	0.0315	18025063	0.0626	4694275	0.0163	2009562	0.0069	37107520	0.1289	0.490952	75582743	0.26253	0.490952	287900827	212318084	0.73747	9.45415e+06	1.84186e+07	3.67145e+07	15922577	294271	1808215	245395	163	121	YES
Hymenoptera	Braconidae	Cotesia	173	453	GCA_000956155.1	NA	short	short	186103588	12	46055	4.66	87	5.6	92.6	2.8	4.6	100	2532247	0.0136	102642	0.0005	2966858	0.0159	7386685	0.0397	8263520	0.0443	2020899	0.0109	35252496	0.1895	0.602346	58525347	0.314477	0.602346	186103588	127578241	0.685523	4.20398e+06	4.92551e+06	1.22632e+07	6593196	64741	728748	198226	200	144	YES
Hymenoptera	Formicidae	Wasmannia	280	363	GCA_000956235.1	NA	short	short	324120201	8	37912	4.58	97.9	0.5	98.4	0.7	0.9	100	3272318	0.0101	156357	0.0005	6645707	0.0205	20386935	0.0629	8661623	0.0268	3520960	0.0108	33655919	0.1038	0.441101	76299819	0.235406	0.441101	324120201	247820382	0.764594	7.41852e+06	1.50662e+07	4.62183e+07	17038499	302143	3046293	201223	178	133	YES
Diptera	Culicidae	Anopheles	387	143	GCA_000956255.1	NA	short	short	146157495	0	10256	4.01	86.4	1.8	88.2	2.3	9.5	100	419515	0.0029	123345	0.0008	177855	0.0013	137465	0.001	2872004	0.0196	15458	0	608219	0.0041	0.139696	4353861	0.0297888	NA_quality	146157495	141803634	0.970211	NA_quality	NA_quality	NA_quality	123444	9166	4855	4179	146	92	NO
Diptera	Culicidae	Anopheles	398	142	GCA_000956275.1	NA	short	short	151110088	0	4659	3.67	87.6	0.9	88.5	5.3	6.2	100	222733	0.0015	96974	0.0006	172075	0.0011	103825	0.0007	2754036	0.0182	11447	0	521089	0.0034	0.134226	3882179	0.0256911	NA_quality	151110088	147227909	0.974309	NA_quality	NA_quality	NA_quality	98660	418	4747	4719	110	81	NO
Hemiptera	Gerridae	Gerris	356	497	GCA_001010745.2	NA	short	short	994443371	212	10917	4.04	92.2	2.5	94.7	1.6	3.7	100	26375681	0.0266	6165286	0.0062	25787565	0.0259	62561605	0.0629	24354451	0.0244	56530805	0.0567	198513430	0.1997	0.495925	400288823	0.402526	0.495925	994443371	594154548	0.597474	5.31848e+07	5.19989e+07	1.26151e+08	52491626	9494708	575271	1317288	163	120	YES
Diptera	Scatopsidae	Coboldia	374	121	GCA_001014335.1	NA	short	short	98759061	3	145453	5.16	97.7	0.9	98.6	0.4	1	100	476142	0.0049	560	0	165003	0.0016	478719	0.0048	2275520	0.023	8947	0.0001	1808067	0.0183	0.346841	5212958	0.0527846	0.346841	98759061	93546103	0.947215	1.3728e+06	475731	1.38023e+06	475210	1808	1701	12558	149	112	YES
Diptera	Drosophilidae	Phortica	404	76	GCA_001014415.1	NA	short	short	155550413	3	6905	3.84	95.5	0.7	96.2	1.5	2.3	100	1990324	0.0128	30015	0.0002	975207	0.0063	2780536	0.0179	11013725	0.0709	4785354	0.0308	7437911	0.0478	0.256364	29013072	0.186519	0.256364	155550413	126537341	0.813481	7.76366e+06	3.80399e+06	1.0846e+07	2755932	2576	22028	77860	102	80	YES
Diptera	Trichoceridae	Trichoceridae	369	NA_quality	GCA_001014425.1	NA	short	short	41711596	7.62	1395	3.14	26.2	0.3	26.5	12.8	60.7	100	258466	0.0062	125980	0.003	181248	0.0044	253390	0.0061	1405594	0.0337	126098	0.003	3281742	0.0787	NA_quality	5632518	0.135035	NA_quality	41711596	36079078	0.864965	NA_quality	NA_quality	NA_quality	243681	106	9603	39989	89	69	NA_quality
Diptera	Chironomidae	Chironomus	405	157	GCA_001014505.1	NA	short	short	154533842	7	7097	3.85	93.3	1.4	94.7	1.8	3.5	100	748280	0.0048	348260	0.0022	335686	0.0021	1667064	0.0108	2566156	0.0165	36425	0.0003	8637142	0.0559	0.602353	14339013	0.0927888	0.602353	154533842	140194829	0.907211	1.24226e+06	557292	2.76759e+06	1662031	529	4504	71128	126	92	YES
Diptera	Glossinidae	Glossina	496	100	GCA_001014515.1	NA	short	short	348062779	4	3909	3.59	94.3	1.1	95.4	2.3	2.3	100	16000162	0.046	634827	0.0018	3447768	0.0099	20821985	0.0598	12147017	0.0349	20516743	0.0589	31943750	0.0918	0.302749	105512252	0.303141	0.302749	348062779	242550527	0.696859	5.28496e+07	1.13882e+07	6.87763e+07	20248158	5810	568017	227951	157	117	YES
Diptera	Sepsidae	Themira	376	88	GCA_001014575.1	NA	short	short	99885510	0	2825	3.45	64.9	1.7	66.6	10.7	22.7	100	771012	0.0077	1243	0	426353	0.0042	203448	0.002	2225537	0.0223	66462	0.0007	1182201	0.0118	0.24244	4876256	0.0488185	NA_quality	99885510	95009254	0.951182	NA_quality	NA_quality	NA_quality	201289	124	2035	9091	133	95	NO
Diptera	Tephritidae	Trupanea	373	NA_quality	GCA_001014665.1	NA	short	short	97281263	7.99	865	2.94	23.8	0.1	23.9	19.7	56.4	100	4533027	0.0466	388	0	2076487	0.0214	1223256	0.0126	2505385	0.0257	221744	0.0021	10050573	0.1033	NA_quality	20610860	0.211869	NA_quality	97281263	76670403	0.788131	NA_quality	NA_quality	NA_quality	1213734	343	9179	128393	83	68	NA_quality
Diptera	Ephydridae	Ephydra	507	77	GCA_001014675.1	NA	short	short	410872512	15	2117	3.33	90.1	0.4	90.5	4	5.5	100	16635718	0.0405	5239	0	1571260	0.0038	34372092	0.0836	9870901	0.0242	20519537	0.0498	36266313	0.0883	0.304143	119241060	0.290214	0.304143	410872512	291631452	0.709786	5.46971e+07	5.16619e+06	1.13013e+08	34103912	710	267470	221770	185	115	YES
Diptera	Chaoboridae	Chaoborus	480	156	GCA_001014815.1	NA	short	short	269281158	0	2040	3.31	63.9	0.6	64.5	12	23.5	100	1207066	0.0045	168513	0.0006	1213638	0.0045	13322157	0.0495	11650766	0.0432	806584	0.003	73561987	0.2732	0.721686	101930711	0.378529	NA_quality	269281158	167350447	0.621471	NA_quality	NA_quality	NA_quality	12755394	221	566542	540119	155	107	NO
Diptera	Calliphoridae	Lucilia	494	90	GCA_001014835.1	NA	short	short	319935455	0	1613	3.21	78.4	0.1	78.5	11.2	10.3	100	12270622	0.0384	12282	0	2945505	0.0092	4986053	0.0156	18027106	0.0564	6858997	0.0215	47502385	0.1485	0.512968	92602950	0.289443	NA_quality	319935455	227332505	0.710557	NA_quality	NA_quality	NA_quality	4926471	2816	56766	410267	129	90	NO
Diptera	Chaoboridae	Mochlonyx	513	155	GCA_001014845.1	NA	short	short	441264227	77	3304	3.52	90.2	0.4	90.6	5.5	3.9	100	28364916	0.0643	8584320	0.0195	3307367	0.0075	40770949	0.0924	4755462	0.0108	6606459	0.0149	147598448	0.3345	0.615024	239987921	0.543864	0.615024	441264227	201276306	0.456136	4.612e+07	5.37762e+06	6.62916e+07	40723725	325	46899	1182877	139	99	YES
Diptera	Dolichopodidae	Condylostylus	515	110	GCA_001014875.1	NA	short	short	451941653	0	1110	3.05	51.1	0.5	51.6	14.6	33.8	100	4945847	0.0109	174238	0.0004	1247666	0.0028	7919634	0.0176	14911902	0.033	1750122	0.0038	47186534	0.1044	0.603903	78135943	0.172889	NA_quality	451941653	373805710	0.827111	NA_quality	NA_quality	NA_quality	7827070	34738	57826	434436	116	92	NO
Diptera	Agromyzidae	Liriomyza	370	NA_quality	GCA_001014935.1	NA	short	short	69698627	7.84	1816	3.26	42.8	4.4	47.2	15.1	37.7	100	349381	0.005	775	0	757108	0.0108	613398	0.0088	2346738	0.0337	202863	0.003	3877373	0.0556	NA_quality	8147636	0.116898	NA_quality	69698627	61550991	0.883102	NA_quality	NA_quality	NA_quality	605626	381	7391	29850	139	97	NA_quality
Diptera	Psychodidae	Clogmia	478	124	GCA_001014945.1	NA	short	short	256248749	0	9372	3.97	85.2	0.7	85.9	7.3	6.8	100	8148139	0.0318	153983	0.0006	545795	0.0021	13106733	0.0512	3200311	0.0125	1247684	0.0048	67533568	0.2636	0.71893	93936213	0.366582	NA_quality	256248749	162312536	0.633418	NA_quality	NA_quality	NA_quality	7569110	5411521	126102	446680	164	122	NO
Diptera	Ephydridae	Cirrula	506	78	GCA_001015075.1	NA	short	short	399685866	0	1781	3.25	50	0.7	50.7	12.7	36.6	100	12024804	0.0301	96990	0.0002	1559067	0.0039	17605271	0.0441	15068488	0.0376	19891895	0.0497	64294639	0.1609	0.492524	130541154	0.326609	NA_quality	399685866	269144712	0.673391	NA_quality	NA_quality	NA_quality	17341296	648	263327	416274	175	121	NO
Diptera	Tephritidae	Eutreta	471	NA_quality	GCA_001015115.1	NA	short	short	233053157	8.37	387	2.59	39.4	0	39.4	26	34.6	100	21314579	0.0915	40582	0.0002	3413212	0.0146	2856667	0.0122	3632402	0.0156	1328636	0.0057	31732896	0.1362	NA_quality	64318974	0.275984	NA_quality	233053157	168734183	0.724016	NA_quality	NA_quality	NA_quality	2845087	1031	10549	408958	84	69	NA_quality
Diptera	Syrphidae	Eristalis	490	NA_quality	GCA_001015145.1	NA	short	short	315428702	8.5	405	2.61	36.9	0.2	37.1	20.3	42.6	100	12527974	0.0397	681	0	1594461	0.0051	3491910	0.011	2174162	0.0069	650952	0.0019	15964534	0.0506	NA_quality	36404674	0.115413	NA_quality	315428702	279024028	0.884587	NA_quality	NA_quality	NA_quality	3477159	279	14472	217465	77	64	NA_quality
Diptera	Phoridae	Megaselia	509	109	GCA_001015175.1	NA	short	short	412270594	0	3270	3.51	71.5	1.2	72.7	14.3	13	100	43446349	0.1054	185943	0.0004	9345381	0.0227	3426282	0.0083	6035964	0.0146	1133322	0.0028	130430204	0.3164	0.672309	194003445	0.470573	NA_quality	412270594	218267149	0.529427	NA_quality	NA_quality	NA_quality	3321298	82813	22171	1076636	136	98	NO
Diptera	Asilidae	Holcocephala	523	112	GCA_001015215.1	NA	short	short	516230974	0	1778	3.25	78.8	0.7	79.5	10.8	9.7	100	22149204	0.0429	114082	0.0002	1382047	0.0027	79471264	0.154	8888970	0.0172	2733118	0.0053	36845540	0.0714	0.24307	151584225	0.293636	NA_quality	516230974	364646749	0.706364	NA_quality	NA_quality	NA_quality	79430264	681	40319	324372	123	91	NO
Diptera	Diopsidae	Sphyracephala	492	108	GCA_001015235.1	NA	short	short	315521093	0	1477	3.17	68.3	0.7	69	13.7	17.3	100	21984080	0.0696	771	0	1727434	0.0055	19900960	0.0631	9870817	0.0313	2771459	0.0087	26197721	0.083	0.317728	82453242	0.261324	NA_quality	315521093	233067851	0.738676	NA_quality	NA_quality	NA_quality	19888795	953	11212	292607	98	81	NO
Diptera	Calliphoridae	Calliphora	516	91	GCA_001017275.1	NA	short	short	459231066	0	1086	3.04	77.2	0.3	77.5	11.1	11.4	100	15670808	0.0342	43062	0.0001	2454341	0.0053	26635821	0.058	7643799	0.0166	4853217	0.0105	75598911	0.1646	0.568841	132899959	0.289397	NA_quality	459231066	326331107	0.710603	NA_quality	NA_quality	NA_quality	26582360	3670	49791	890674	93	72	NO
Diptera	Tephritidae	Tephritis	495	87	GCA_001017515.1	NA	short	short	342257700	0	906	2.96	55.1	0.2	55.3	21.4	23.3	100	25440083	0.0744	696554	0.002	4471118	0.013	6354540	0.0186	5595775	0.0164	2491169	0.0072	71613728	0.2093	0.613851	116662967	0.340863	NA_quality	342257700	225594733	0.659137	NA_quality	NA_quality	NA_quality	6330589	1575	22376	884045	87	72	NO
Diptera	Tipulidae	Tipula	525	125	GCA_001017535.1	NA	short	short	541697276	0	600	2.78	60.1	0.5	60.6	13.2	26.2	100	46637444	0.0861	837	0	24024574	0.0443	34473475	0.0637	4915270	0.009	1711609	0.0031	34020258	0.0628	0.233362	145783467	0.269124	NA_quality	541697276	395913809	0.730877	NA_quality	NA_quality	NA_quality	34388455	55823	29197	381153	96	74	NO
Hymenoptera	Formicidae	Lasius	209	387	GCA_001045655.1	NA	short	short	236236391	5	17048	4.23	94.8	0.8	95.6	2.8	1.6	100	2806091	0.0118	35549	0.0001	7080421	0.03	7803318	0.0331	8595013	0.0365	1262275	0.0053	12723619	0.0538	0.315673	40306286	0.170618	0.315673	236236391	195930105	0.829382	8.88922e+06	2.24296e+07	2.47196e+07	7196878	100698	505742	74496	178	111	YES
Diptera	Glossinidae	Glossina	500	101	GCA_001077435.1	NA	none	none	363107242	7	49769	4.7	96.9	2	98.9	0.4	0.7	100	20504673	0.0564	502569	0.0014	4292731	0.0119	23765394	0.0654	12972494	0.0358	24618523	0.0678	35732556	0.0984	0.291959	122388940	0.33706	0.291959	363107242	240718302	0.66294	7.02313e+07	1.47032e+07	8.13998e+07	22820383	1234	943777	228625	174	121	YES
Lepidoptera	Pyralidae	Amyelois	108	245	GCA_001186105.1	NA	short	short	406468287	84	17697	4.25	96	1.9	97.9	0.7	1.4	100	49805836	0.1225	9209666	0.0226	4376890	0.0107	5088873	0.0125	3360177	0.0082	31768639	0.0782	22152953	0.0545	0.176148	125763034	0.309404	0.176148	406468287	280705253	0.690596	2.82749e+08	2.48477e+07	2.88897e+07	4946689	176	142008	243516	113	90	YES
Hemiptera	Aphididae	Diuraphis	343	469	GCA_001186385.1	NA	short	short	395057805	0	13141	4.12	87.4	2	89.4	4.5	6.1	100	6411894	0.0163	37368	0.0001	1767051	0.0045	23217081	0.0588	12519071	0.0317	1761007	0.0045	21680715	0.0549	0.3217	67394187	0.170593	NA_quality	395057805	327663618	0.829407	NA_quality	NA_quality	NA_quality	22740020	27676	449385	86048	164	119	NO
Diptera	Tephritidae	Bactrocera	520	82	GCA_001188975.4	NA	long	pacb_oxford	484931532	41	187710	5.27	98.8	0.3	99.1	0.2	0.7	100	26719709	0.0551	3277	0	19746848	0.0407	39213529	0.0809	9102283	0.0188	32183070	0.0664	65723336	0.1356	0.34108	192692052	0.397359	0.34108	484931532	292239480	0.602641	7.83386e+07	5.78951e+07	1.14969e+08	38862806	2424	348299	369347	198	121	YES
Hymenoptera	Apidae	Habropoda	268	346	GCA_001263275.1	NA	short	short	296954667	8	22370	4.35	97.6	0.2	97.8	0.8	1.4	100	2235967	0.0076	408496	0.0014	1736446	0.0058	14705076	0.0496	4772174	0.0161	753561	0.0025	49987229	0.1683	0.67008	74598949	0.251213	0.67008	296954667	222355718	0.748787	3.33687e+06	2.5914e+06	2.19453e+07	14697108	342	7626	292445	180	119	YES
Hymenoptera	Diprionidae	Neodiprion	212	457	GCA_001263575.2	NA	short	short	239776993	11	87373	4.94	98.8	0.4	99.2	0.3	0.5	100	1555528	0.0065	2980	0	2617425	0.0109	11232833	0.0468	5974235	0.025	1292265	0.0054	25887746	0.108	0.533075	48563012	0.202534	0.533075	239776993	191213981	0.797466	2.91803e+06	4.91005e+06	2.10718e+07	7764831	61799	3406203	132725	205	151	YES
Lepidoptera	Geometridae	Operophtera	139	238	GCA_001266575.1	NA	short	short	638207720	288	28848	4.46	92	2.5	94.5	2.8	2.7	100	127304002	0.1995	26383209	0.0413	5989594	0.0093	14089650	0.0221	6398878	0.01	53659954	0.0841	145418827	0.2278	0.383444	379244114	0.594233	0.383444	638207720	258963606	0.405767	3.32002e+08	1.56205e+07	3.6745e+07	13577528	399698	112424	1109011	140	99	YES
Hymenoptera	Halictidae	Dufourea	252	353	GCA_001272555.1	NA	short	short	279505983	13	191865	5.28	98.8	0.3	99.1	0.4	0.5	100	3426632	0.0122	25879	0.0001	2558703	0.0092	21425515	0.0766	2916708	0.0103	222848	0.0008	51028554	0.1826	0.625313	81604839	0.291961	0.625313	279505983	197901144	0.708039	5.47987e+06	4.09188e+06	3.42637e+07	19877843	5711	1541961	327295	163	126	YES
Hymenoptera	Apidae	Melipona	237	332	GCA_001276565.1	NA	short	short	256302695	4	12520	4.1	97.4	0.1	97.5	1.4	1.1	100	1056037	0.0041	12230	0	1003430	0.0039	7479026	0.0292	7951034	0.031	183749	0.0007	21826280	0.0852	0.552399	39511786	0.154161	0.552399	256302695	216790909	0.845839	1.91173e+06	1.81649e+06	1.35392e+07	7471883	92	7051	143552	159	129	YES
Lepidoptera	Hesperiidae	Lerema	81	210	GCA_001278395.1	NA	short	short	298169737	32	16756	4.22	95.3	0.4	95.7	2.3	2	100	2591725	0.0087	6693865	0.0224	1206202	0.0041	6117858	0.0205	3696601	0.0123	15775494	0.0528	24692931	0.0828	0.406303	60774676	0.203826	0.406303	298169737	237395061	0.796174	6.3788e+06	2.96873e+06	1.50574e+07	6105619	302	11937	211269	124	96	YES
Lepidoptera	Papilionidae	Papilio	60	211	GCA_001298345.1	NA	short	short	243231804	34	521387	5.72	97.1	1.1	98.2	0.7	1.1	100	13808795	0.0568	6414403	0.0263	515267	0.0021	2874314	0.0118	3166386	0.013	17104912	0.0704	10885610	0.0448	0.198752	54769687	0.225175	0.198752	243231804	188462117	0.774825	6.94774e+07	2.59251e+06	1.44618e+07	2872289	160	1865	108837	107	94	YES
Lepidoptera	Papilionidae	Papilio	69	212	GCA_001298355.1	NA	short	short	278421261	55	92238	4.96	95.2	0.7	95.9	2	2.1	100	12758928	0.0458	3534589	0.0127	1274553	0.0046	4551714	0.0164	3348062	0.0121	22154537	0.0795	16795195	0.0603	0.260724	64417578	0.231367	0.260724	278421261	214003683	0.768633	4.89366e+07	4.88852e+06	1.7458e+07	4538718	716	12280	149645	116	92	YES
Hymenoptera	Formicidae	Dinoponera	234	399	GCA_001313825.1	NA	short	short	259665865	7	29911	4.48	98	0.4	98.4	0.8	0.8	100	2387103	0.0092	241701	0.0009	3253143	0.0125	23846910	0.0918	7032933	0.0271	716671	0.0028	36398606	0.1402	0.492692	73877067	0.284508	0.492692	259665865	185788798	0.715492	4.84503e+06	6.6028e+06	4.84013e+07	21664317	851865	1330728	240190	160	115	YES
Hymenoptera	Vespidae	Polistes	183	403	GCA_001313835.1	NA	short	short	211202212	2	29465	4.47	98.7	0.4	99.1	0.2	0.7	100	1584510	0.0075	1949	0	3212368	0.0152	4134962	0.0195	18821635	0.0891	553580	0.0025	20326275	0.0963	0.417933	48635279	0.230278	0.417933	211202212	162566933	0.769722	3.7913e+06	7.68633e+06	9.89385e+06	4093878	838	40246	76749	284	121	YES
Lepidoptera	Pyralidae	Plodia	99	244	GCA_001368715.1	NA	none	none	381952380	46	313003	5.5	97	1.2	98.2	0.4	1.4	100	19374039	0.0507	17865450	0.0467	3768818	0.0098	3826083	0.01	4414874	0.0116	32430934	0.0848	35575412	0.0932	0.303401	117255610	0.30699	0.303401	381952380	264696770	0.69301	6.38563e+07	1.24219e+07	1.26107e+07	3531945	525	293613	389114	103	83	YES
Coleoptera	Silphidae	Nicrophorus	563	292	GCA_001412225.1	SRR2062947	long	pacbio	195273382	5	67958	4.83	98	1.5	99.5	0.3	0.2	100	2783671	0.0142	5519	0	226947	0.0012	9468832	0.0485	5508080	0.0282	55621	0.0003	10499966	0.0538	0.367792	28548636	0.146185	0.367792	195291274	166742638	0.853815	7.5686e+06	617052	2.57451e+07	9463637	373	4822	86259	133	94	YES
Hymenoptera	Braconidae	Diachasma	296	450	GCA_001412515.3	NA	short	short	384371871	28	45480	4.66	98	0.3	98.3	0.6	1.1	100	13827031	0.036	2358890	0.0061	22472356	0.0584	33171754	0.0863	3862358	0.0099	10426251	0.027	124526119	0.324	0.591166	210644759	0.548023	0.591166	384371871	173727112	0.451977	2.33894e+07	3.80136e+07	5.61124e+07	20406954	1348715	11416085	622037	219	144	YES
Hymenoptera	Vespidae	Polistes	182	404	GCA_001465965.1	NA	short	short	208026220	4	42260	4.63	98.8	0.4	99.2	0.1	0.7	100	2272972	0.0109	28432	0.0001	1568639	0.0075	6748869	0.0325	23128471	0.1112	1871272	0.0089	13931691	0.067	0.281162	49550346	0.238193	0.281162	208026220	158475874	0.761807	8.0842e+06	5.57912e+06	2.40035e+07	6679938	51897	17034	82560	178	110	YES
Hymenoptera	Apidae	Eufriesea	309	342	GCA_001483705.1	NA	short	short	596278454	8	38936	4.59	96.9	1.5	98.4	0.6	1	100	14098580	0.0236	2174	0	4907579	0.0083	11336471	0.019	15623709	0.0261	515759	0.0008	262231686	0.4397	0.849427	308715958	0.517738	0.849427	596278454	287562496	0.482262	1.65978e+07	5.77752e+06	1.3346e+07	11323493	344	12634	517344	527	201	YES
Lepidoptera	Nymphalidae	Heliconius	40	NA_quality	GCA_001485725.1	NA	none	none	8082514	6.91	504	2.7	5.8	0.1	5.9	3.4	90.7	100	609547	0.0754	25226	0.0031	107047	0.0132	257078	0.0318	144967	0.0179	743409	0.0919	40844	0.005	NA_quality	1928118	0.238554	NA_quality	8082514	6154396	0.761446	NA_quality	NA_quality	NA_quality	250438	0	6640	379	110	75	NA_quality
Lepidoptera	Nymphalidae	Heliconius	68	181	GCA_001485905.1	NA	none	none	266946155	0	2498	3.4	74.5	0.4	74.9	15.1	10	100	5598264	0.021	253349	0.0009	892853	0.0033	4277611	0.016	5602959	0.021	49754179	0.1863	2404683	0.009	0.03496	68783898	0.25767	NA_quality	266946155	198162257	0.74233	NA_quality	NA_quality	NA_quality	4266429	324	10858	26493	96	74	NO
Lepidoptera	Nymphalidae	Heliconius	63	182	GCA_001485965.1	NA	none	none	259837422	0	2386	3.38	78.9	0.4	79.3	13.3	7.4	100	5032682	0.0194	252136	0.0009	863242	0.0034	4002120	0.0154	5184886	0.0199	45197928	0.1739	2862417	0.011	0.0451518	63395411	0.243981	NA_quality	259837422	196442011	0.756019	NA_quality	NA_quality	NA_quality	3990310	404	11406	33427	93	71	NO
Lepidoptera	Nymphalidae	Heliconius	76	180	GCA_001485985.1	NA	none	none	282526854	0	2400	3.38	77.5	0.7	78.2	13.3	8.5	100	6548727	0.0232	158656	0.0005	1013436	0.0035	4603289	0.0163	5821377	0.0205	52962446	0.1875	2963326	0.0104	0.0400064	74071257	0.262174	NA_quality	282526854	208455597	0.737826	NA_quality	NA_quality	NA_quality	4590581	523	12185	30899	99	76	NO
Lepidoptera	Nymphalidae	Heliconius	78	165	GCA_001486105.1	NA	none	none	290420786	0	3152	3.5	75.2	0.5	75.7	15.8	8.5	100	6295651	0.0217	184807	0.0006	1230885	0.0042	4773985	0.0164	6004007	0.0206	55555246	0.1914	3296252	0.0113	0.0426198	77340833	0.266306	NA_quality	290420786	213079953	0.733694	NA_quality	NA_quality	NA_quality	4757665	334	15986	37484	94	72	NO
Lepidoptera	Nymphalidae	Heliconius	42	NA_quality	GCA_001486245.1	NA	none	none	12807014	7.11	311	2.49	4.5	0.1	4.6	4.5	90.9	100	706012	0.0551	63183	0.0049	162557	0.0127	224062	0.0175	220027	0.0172	639344	0.0499	65343	0.0051	NA_quality	2080528	0.162452	NA_quality	12807014	10726486	0.837548	NA_quality	NA_quality	NA_quality	215925	78	8059	721	97	72	NA_quality
Lepidoptera	Nymphalidae	Heliconius	41	NA_quality	GCA_001486365.1	NA	none	none	8453332	6.93	522	2.72	6.4	0	6.4	3.1	90.5	100	630253	0.0746	32613	0.0038	94616	0.0112	237745	0.0282	154461	0.0183	822315	0.0973	40573	0.0048	NA_quality	2012576	0.238081	NA_quality	8453332	6440756	0.761919	NA_quality	NA_quality	NA_quality	233037	0	4708	351	117	66	NA_quality
Lepidoptera	Nymphalidae	Heliconius	38	NA_quality	GCA_001486405.1	NA	none	none	7449788	6.87	594	2.77	5.3	0.1	5.4	3.3	91.3	100	498360	0.0669	35298	0.0047	67175	0.009	209558	0.0282	142703	0.0191	727735	0.0977	36086	0.0048	NA_quality	1716915	0.230465	NA_quality	7449788	5732873	0.769535	NA_quality	NA_quality	NA_quality	205573	0	3985	225	163	73	NA_quality
Lepidoptera	Nymphalidae	Heliconius	72	176	GCA_001486625.1	NA	none	none	277374261	0	3091	3.49	74.5	0.4	74.9	15.9	9.2	100	5319901	0.0192	299695	0.0011	1191432	0.0043	4567090	0.0164	5769393	0.0207	53425636	0.1927	2762418	0.01	0.0376682	73335565	0.264392	NA_quality	277374261	204038696	0.735608	NA_quality	NA_quality	NA_quality	4549331	645	17114	31090	96	78	NO
Lepidoptera	Nymphalidae	Heliconius	39	NA_quality	GCA_001486745.1	NA	none	none	7865038	6.9	497	2.7	4.1	0.1	4.2	3.4	92.4	100	532342	0.0676	45816	0.0058	87516	0.0111	235717	0.0299	141817	0.018	739443	0.094	40877	0.0052	NA_quality	1823528	0.231852	NA_quality	7865038	6041510	0.768148	NA_quality	NA_quality	NA_quality	231829	0	3888	371	112	61	NA_quality
Lepidoptera	Nymphalidae	Heliconius	44	NA_quality	GCA_001510935.1	NA	none	none	157189997	8.2	660	2.82	6.8	1.6	8.4	6.4	85.2	100	209636	0.0013	252726	0.0016	407571	0.0026	682013	0.0043	1451700	0.0093	1145211	0.0074	23150027	0.1473	NA_quality	27298884	0.173668	NA_quality	157189997	129891113	0.826332	NA_quality	NA_quality	NA_quality	681450	62	501	50137	466	266	NA_quality
Diptera	Culicidae	Anopheles	486	133	GCA_001542645.1	NA	long	pacbio	293732707	0	101465	5.01	82.4	3.4	85.8	7.7	6.5	100	13398568	0.0457	2744938	0.0093	17913513	0.0609	19277131	0.0656	7874366	0.0267	3274760	0.0112	14973686	0.0509	0.18845	79456962	0.270494	NA_quality	293748066	214291104	0.729506	NA_quality	NA_quality	NA_quality	19272105	134	4892	71556	220	126	NO
Lepidoptera	Pieridae	Phoebis	77	203	GCA_001586405.1	NA	short	short	287490372	35	26405	4.42	90.3	0.8	91.1	0.7	8.2	100	12411592	0.0432	9124551	0.0317	932771	0.0033	2798136	0.0098	3519975	0.0123	31826674	0.1107	25342362	0.0882	0.294829	85956061	0.298988	0.294829	287490372	201534311	0.701012	4.20976e+07	3.16377e+06	9.4907e+06	2780988	168	16980	205139	131	100	YES
Hymenoptera	Formicidae	Atta	261	355	GCA_001594045.1	NA	short	short	291257934	14	15290	4.18	98.9	0.4	99.3	0.4	0.3	100	5182689	0.0178	113945	0.0004	4057383	0.0139	35794560	0.1229	9122169	0.0313	4774225	0.0165	33705557	0.1157	0.3634	92750528	0.318448	0.3634	291257934	198507406	0.681552	1.42617e+07	1.11651e+07	9.8499e+07	30735686	325861	4733013	221751	163	121	YES
Hymenoptera	Formicidae	Trachymyrmex	241	361	GCA_001594055.1	NA	short	short	267973152	25	52131	4.72	99	0	99	0.4	0.6	100	2612821	0.0097	15505	0.0001	3089768	0.0116	24414004	0.0911	6711619	0.025	2486295	0.0093	33942068	0.1267	0.463233	73272080	0.273431	0.463233	267973152	194701072	0.726569	5.6404e+06	6.67e+06	5.27035e+07	22837736	222356	1353912	228811	157	121	YES
Hymenoptera	Formicidae	Cyphomyrmex	270	362	GCA_001594065.1	NA	short	short	300316566	11	74312	4.87	98.5	1	99.5	0.1	0.4	100	4840222	0.0161	58905	0.0002	7940296	0.0264	27342515	0.0911	7328592	0.0245	5272761	0.0177	37682217	0.1254	0.416537	90465508	0.301234	0.416537	300316566	209851058	0.698766	1.16202e+07	1.90626e+07	6.56425e+07	23998835	339095	3004585	237838	168	124	YES
Hymenoptera	Formicidae	Trachymyrmex	292	360	GCA_001594075.1	NA	short	short	369438293	41	29356	4.47	98.6	0.6	99.2	0.3	0.5	100	10693083	0.029	75519	0.0002	10457670	0.0283	45852431	0.1241	7351593	0.0199	10015623	0.0272	57818294	0.1565	0.406415	142264213	0.385082	0.406415	369438293	227174080	0.614918	2.63108e+07	2.57315e+07	1.12822e+08	38660709	293325	6898397	366519	168	122	YES
Hymenoptera	Formicidae	Trachymyrmex	265	359	GCA_001594115.1	NA	short	short	291747019	11	14962	4.17	99	0.2	99.2	0.4	0.4	100	7018257	0.024	25577	0.0001	5556966	0.0191	32633098	0.1119	8143064	0.028	6112992	0.0209	33806535	0.1159	0.362356	93296489	0.319786	0.362356	291747019	198450530	0.680214	1.93684e+07	1.53357e+07	9.00581e+07	27310481	149059	5173558	233865	155	119	YES
Lepidoptera	Lycaenidae	Calycopis	146	200	GCA_001625245.1	NA	short	short	728788927	172	11646	4.07	92.9	1.7	94.6	2.6	2.8	100	107418968	0.1474	9743303	0.0133	7082410	0.0097	28235119	0.0388	7924549	0.0109	65483983	0.0897	99358154	0.1364	0.305486	325246486	0.446284	0.305486	728788927	403542441	0.553716	3.51633e+08	2.31841e+07	9.2427e+07	27077582	1048190	109347	699609	151	103	YES
Hymenoptera	Apidae	Ceratina	179	344	GCA_001652005.1	NA	short	short	199936949	5	23399	4.37	96.2	1.8	98	0.4	1.6	100	2311092	0.0115	3147	0	2865920	0.0144	4547999	0.0228	2241603	0.0111	182968	0.0009	12635398	0.0632	0.509736	24788127	0.12398	0.509736	199936949	175148822	0.87602	4.5339e+06	5.62236e+06	8.92227e+06	4460136	5999	81864	92300	143	104	YES
Diptera	Drosophilidae	Drosophila	390	60	GCA_001654015.2	NA	short	short	147357603	1	26679	4.43	97.3	0.9	98.2	0.4	1.4	100	605028	0.0041	4357	0	1228279	0.0084	1323218	0.009	13953908	0.0947	2435130	0.0166	2942619	0.02	0.130826	22492539	0.152639	0.130826	147357603	124865064	0.847361	4.62466e+06	9.38861e+06	1.01143e+07	1306523	490	16205	26864	114	79	YES
Diptera	Drosophilidae	Drosophila	386	59	GCA_001654025.1	NA	short	short	141386800	5	15132	4.18	95	1	96	0.8	3.2	100	1220403	0.0087	2070	0	1129560	0.008	2067069	0.0146	11654071	0.0825	3239036	0.0228	2607833	0.0185	0.11897	21920042	0.155036	0.11897	141386800	119466758	0.844964	1.02581e+07	9.49447e+06	1.73747e+07	2055101	586	11382	22180	126	83	YES
Plecoptera	Nemouridae	Amphinemura	12	NA_quality	GCA_001676325.1	NA	short	short	271924966	8.43	846	2.93	48.1	0.7	48.8	30.2	21	100	2268009	0.0083	362937	0.0013	401267	0.0015	2582878	0.0095	6985643	0.0257	1805992	0.0066	36723314	0.1351	NA_quality	51130040	0.18803	NA_quality	271924966	220794926	0.81197	NA_quality	NA_quality	NA_quality	2522112	7734	53032	333559	118	88	NA_quality
Ephemeroptera	Baetidae	Baetis	366	NA_quality	GCA_001676355.1	NA	short	short	174117300	8.24	529	2.72	20.6	0.3	20.9	35.3	43.8	100	536903	0.0031	30995	0.0002	264933	0.0015	175638	0.001	1388123	0.0079	55587	0.0003	15239897	0.0876	NA_quality	17692076	0.10161	NA_quality	174117300	156425224	0.89839	NA_quality	NA_quality	NA_quality	166134	316	9188	135731	119	91	NA_quality
Plecoptera	Perlodidae	Isoperla	14	NA_quality	GCA_001676475.1	NA	short	short	509522935	8.71	457	2.66	13.5	0.1	13.6	38.4	48	100	7168981	0.0141	5961642	0.0117	1898976	0.0037	4800059	0.0094	8359621	0.0163	6364231	0.0125	108446903	0.2128	NA_quality	143000413	0.280655	NA_quality	509522935	366522522	0.719345	NA_quality	NA_quality	NA_quality	4520800	1194	278065	1168497	99	78	NA_quality
Diptera	Tephritidae	Rhagoletis	533	85	GCA_001687245.1	NA	short	short	1113962544	103	19348	4.29	82.1	15.4	97.5	0.9	1.6	100	99225908	0.089	5644938	0.0051	38956073	0.0349	84994324	0.0763	18072255	0.0162	39800601	0.0357	330390092	0.2966	0.535405	617084191	0.553954	0.535405	1113962544	496878353	0.446046	1.85329e+08	7.276e+07	1.58748e+08	83732022	100494	1161808	2026880	178	125	YES
Collembola	Orchesellidae	Orchesella	551	537	GCA_001718145.1	SRR2222657	long	pacbio	286766519	0	64904	4.81	84.5	3.3	87.8	1.5	10.7	100	3639928	0.0127	61564	0.0002	5734958	0.02	3379161	0.0118	2435771	0.0085	628257	0.0022	24447071	0.0853	0.606225	40326710	0.140626	NA_quality	286766519	246439809	0.859374	NA_quality	NA_quality	NA_quality	3003444	153	375564	78210	321	186	NO
Diptera	Calliphoridae	Phormia	527	94	GCA_001735545.1	SRR4047244	long	pacbio	549932840	18	5563	3.75	93.8	2.2	96	2.6	1.4	100	15020653	0.0273	444919	0.0008	3085408	0.0056	22428283	0.0408	21233934	0.0385	24494081	0.0445	176329459	0.3206	0.670361	263036737	0.478307	0.670361	549932840	286896103	0.521693	2.24068e+07	4.60261e+06	3.3457e+07	22312596	4920	110767	1234870	158	115	YES
Diptera	Drosophilidae	Zaprionus	378	73	GCA_001752445.1	NA	short	short	123674749	1	3365	3.53	90.3	1.2	91.5	4.5	4	100	833638	0.0067	2015	0	1341977	0.0109	752179	0.006	8030646	0.0649	1410928	0.0114	2822888	0.0228	0.185786	15194271	0.122857	0.185786	123674749	108480478	0.877143	4.48708e+06	7.22323e+06	4.04862e+06	706952	9553	35674	28668	103	78	YES
Diptera	Tephritidae	Bactrocera	517	79	GCA_001853355.1	NA	short	short	462489382	40	31499	4.5	98.4	0.7	99.1	0.2	0.7	100	50968337	0.1102	3479	0	15171582	0.0328	63619833	0.1375	8408876	0.0182	17947334	0.0387	29955134	0.0647	0.160985	186074575	0.402333	0.160985	462489382	276414807	0.597667	3.16604e+08	9.42425e+07	3.95192e+08	63574810	1038	43985	216674	153	102	YES
Hemiptera	Aleyrodidae	Bemisia	349	485	GCA_001854935.1	SRR3180082	long	pacbio	615001830	92	84501	4.93	95.8	1.8	97.6	0.7	1.7	100	9613833	0.0156	805965	0.0013	13606814	0.0221	139027677	0.226	5281528	0.0085	11664320	0.0189	113992906	0.1853	0.38774	293993043	0.478036	0.38774	615001830	321008787	0.521964	2.47945e+07	3.50926e+07	3.58559e+08	134354468	3489611	1183598	702776	172	134	YES
Hymenoptera	Figitidae	Leptopilina	235	444	GCA_001855655.1	NA	long	pacbio	255343917	20	8276	3.92	91.9	0.7	92.6	3.6	3.8	100	5177345	0.0203	71512	0.0003	6498789	0.0255	15806010	0.0619	10358333	0.0406	4001872	0.0156	50097116	0.1961	0.544469	92010977	0.360341	0.544469	255343917	163332940	0.639659	9.50898e+06	1.1936e+07	2.90301e+07	15006737	166461	632812	256543	216	135	YES
Hemiptera	Aphididae	Myzus	336	467	GCA_001856785.1	NA	short	short	347296088	9	218922	5.34	93.5	2.8	96.3	0.8	2.9	100	6256020	0.018	7631	0	2068729	0.0059	30350145	0.0874	12789822	0.0369	1730457	0.005	27712485	0.0798	0.342488	80915289	0.232986	0.342488	347296088	266380799	0.767014	1.82664e+07	6.0403e+06	8.86168e+07	29742372	1687	606086	94580	177	124	YES
Lepidoptera	Pieridae	Pieris	59	204	GCA_001856805.1	NA	short	short	245871251	33	54957	4.74	97.3	0.8	98.1	0.3	1.6	100	21590988	0.0878	6358432	0.0258	659119	0.0027	6059180	0.0246	2929471	0.012	6811578	0.0276	20350616	0.0827	0.31425	64759384	0.263387	0.31425	245871251	181111867	0.736613	6.87065e+07	2.09744e+06	1.92814e+07	6030556	1119	27505	157459	136	107	YES
Diptera	Culicidae	Aedes	537	153	GCA_001876365.2	NA	long	pacbio	2247289552	225	3303944	6.52	15.9	83.2	99.1	0.1	0.8	100	373423657	0.1661	37331116	0.0166	190469604	0.0847	313876287	0.1397	327792875	0.1459	72876631	0.0325	429343740	0.1911	0.246026	1745113910	0.776542	0.246026	2247289552	502175642	0.223458	1.51782e+09	7.74184e+08	1.27578e+09	306809071	7056882	10334	1853856	241	150	YES
Diptera	Asilidae	Proctacanthus	460	113	GCA_001932985.1	NA	short	short	208907727	3	781095	5.89	99	0.7	99.7	0.2	0.1	100	938638	0.0045	1517	0	1239037	0.0059	2992526	0.0143	3075280	0.0146	1056860	0.0051	17811303	0.0852	0.656876	27115161	0.129795	0.656876	208907727	181792566	0.870205	1.42894e+06	1.88626e+06	4.55569e+06	2789683	50	202793	150736	167	126	YES
Coleoptera	Nitidulidae	Aethina	564	273	GCA_001937115.1	SRR5075724	long	pacbio	234344249	7	298879	5.48	89.7	7.6	97.3	1.3	1.4	100	1053006	0.0045	4832	0	609120	0.0026	16203923	0.0691	6980995	0.0298	1207629	0.0052	13957900	0.0595	0.348796	40017405	0.170763	0.348796	234344249	194326844	0.829237	3.01898e+06	1.74635e+06	4.64568e+07	16111014	1359	91550	99262	152	102	YES
Hymenoptera	Formicidae	Pseudomyrmex	254	396	GCA_002006095.1	NA	short	short	282776121	15	38830	4.59	98.6	0.7	99.3	0.1	0.6	100	12388984	0.0438	259260	0.0009	12737963	0.045	20795757	0.0736	8681996	0.0306	5677853	0.02	34964375	0.1236	0.366095	95506188	0.337745	0.366095	282776121	187269933	0.662255	3.38409e+07	3.47941e+07	5.68042e+07	16449595	313878	4032284	180476	207	130	YES
Diptera	Culicidae	Anopheles	518	140	GCA_002091835.1	NA	short	short	462688933	25	38030	4.58	43.8	55	98.8	0.4	0.8	100	19506936	0.0421	4451132	0.0096	10028682	0.0216	6455738	0.014	7211304	0.0156	392270	0.0008	12042993	0.026	0.200419	60089055	0.129869	0.200419	462688933	402599878	0.870131	9.73307e+07	5.00386e+07	3.22112e+07	6351368	72201	32169	77826	164	92	YES
Diptera	Culicidae	Anopheles	493	145	GCA_002091845.1	NA	short	short	326465827	31	9003	3.95	79.8	13.8	93.6	2.1	4.3	100	1192143	0.0037	234621	0.0007	827387	0.0025	3001449	0.0092	5457075	0.0167	171026	0.0005	18217742	0.0558	0.626008	29101443	0.0891409	0.626008	326465827	297364384	0.910859	1.90436e+06	1.32169e+06	4.79458e+06	2996901	641	3907	108697	175	113	YES
Diptera	Drosophilidae	Drosophila	453	10	GCA_002093755.1	NA	long	pacbio	198035861	12	942627	5.97	97.2	2.1	99.3	0.4	0.3	100	8916695	0.045	62390	0.0003	11340909	0.0573	4990779	0.0252	7166410	0.0362	31577951	0.1594	4387540	0.0221	0.0641053	68442674	0.345607	0.0641053	198035861	129593187	0.654393	1.39094e+08	1.76911e+08	7.78528e+07	2508770	12961	2469048	20211	238	132	YES
Odonata	Calopterygidae	Calopteryx	35	529	GCA_002093875.1	NA	short	short	1628352544	56	4472	3.65	94.7	0.4	95.1	3	1.9	100	143676128	0.0882	22048932	0.0135	3949060	0.0024	44443148	0.0273	15680598	0.0096	30065861	0.0185	99623451	0.0612	0.277127	359487178	0.220767	0.277127	1628352544	1268865366	0.779233	5.18449e+08	1.425e+07	1.60371e+08	44280463	1432	161253	711536	148	103	YES
Lepidoptera	Noctuidae	Helicoverpa	91	222	GCA_002150865.1	NA	short	short	341147348	52	20602	4.31	95.7	1	96.7	1	2.3	100	12464133	0.0365	8570604	0.0251	1354600	0.004	3135981	0.0092	2370902	0.0069	15390156	0.045	20478254	0.06	0.321154	63764630	0.186912	0.321154	341147348	277382718	0.813088	3.88105e+07	4.21792e+06	9.76473e+06	3110844	839	24298	146004	146	110	YES
Hymenoptera	Braconidae	Macrocentrus	156	455	GCA_002156465.1	NA	short	short	127916415	9	65089	4.81	97	1.8	98.8	0.3	0.9	100	589630	0.0046	20469	0.0001	1731469	0.0136	4151061	0.0325	2253384	0.0176	681472	0.0053	17496292	0.1368	0.649845	26923777	0.210479	0.649845	127916415	100992638	0.789521	907339	2.66443e+06	6.38777e+06	2033010	195026	1923025	86655	216	162	YES
Lepidoptera	Noctuidae	Helicoverpa	90	221	GCA_002156985.1	NA	short	short	337072206	43	23479	4.37	97	0.4	97.4	1.3	1.3	100	10143922	0.0301	8189847	0.0243	1178609	0.0035	2957227	0.0088	2396115	0.007	13268082	0.0393	17262141	0.0512	0.311614	55395943	0.164344	0.311614	337072206	281676263	0.835656	3.25529e+07	3.78227e+06	9.49004e+06	2915471	601	41155	139042	129	104	YES
Lepidoptera	Noctuidae	Mamestra	135	218	GCA_002192655.2	NA	short	short	571307853	0	42489	4.63	88.6	0.9	89.5	6.2	4.3	100	75728535	0.1325	12390676	0.0217	3499726	0.0062	15153170	0.0265	4183631	0.0073	31687095	0.0554	86559907	0.1515	0.377657	229202740	0.401179	NA_quality	571323200	342120460	0.598821	NA_quality	NA_quality	NA_quality	14843002	249709	60459	740480	124	95	NO
Lepidoptera	Bombycidae	Bombyx	118	NA_quality	GCA_002197625.1	NA	short	short	450338996	8.65	768	2.89	39.9	0.2	40.1	32.5	27.4	100	52798954	0.1172	47507261	0.1055	2607561	0.0058	8812090	0.0196	4786989	0.0106	7883318	0.0175	20321991	0.0451	NA_quality	144718164	0.321354	NA_quality	450338996	305620832	0.678646	NA_quality	NA_quality	NA_quality	8804375	1149	6566	232624	93	73	NA_quality
Hymenoptera	Apidae	Euglossa	308	343	GCA_002201625.1	NA	short	short	588199719	11	12398	4.09	92.5	1.7	94.2	2.8	3	100	4906377	0.0084	2039	0	3678727	0.0062	19302187	0.0328	6766733	0.0115	468561	0.0007	141608830	0.2407	0.801257	176733454	0.300465	0.801257	588199719	411466265	0.699535	6.12335e+06	4.5912e+06	2.40899e+07	19294329	144	7714	325786	446	165	YES
Diptera	Culicidae	Aedes	536	152	GCA_002204515.1	NA	long	pacbio	1278715314	219	11758062	7.07	93.2	5.3	98.5	0.7	0.8	100	230309956	0.1801	31875829	0.0249	149730902	0.1171	298983185	0.2338	72238377	0.0565	47316508	0.037	187718224	0.1468	0.184368	1018172981	0.796236	0.184368	1278732104	260559123	0.203764	1.24919e+09	8.12132e+08	1.62167e+09	294866822	4082746	33617	866113	227	144	YES
Collembola	Isotomidae	Folsomia	548	538	GCA_002217175.1	SRR2743547	long	pacbio	221702752	16	4885648	6.69	88.4	1.5	89.9	1.5	8.6	100	2301070	0.0104	11215	0	2225527	0.01	8539887	0.0385	2748227	0.0123	1049095	0.0047	32589067	0.147	0.658843	49464088	0.22311	0.658843	221702752	172238664	0.77689	3.49259e+06	3.37793e+06	1.29619e+07	8095089	189	444609	154492	220	152	YES
Diptera	Drosophilidae	Drosophila	435	52	GCA_002217835.1	NA	short	short	181868570	12	114814	5.06	92.9	6.4	99.3	0.3	0.4	100	6742962	0.0371	22943	0.0001	9141753	0.0503	5313691	0.0292	9296958	0.0512	4495198	0.0246	6652809	0.0366	0.159669	41666314	0.229101	0.159669	181868570	140202256	0.770899	4.22309e+07	5.72545e+07	3.32795e+07	5205063	588	108040	48139	148	83	YES
Diptera	Drosophilidae	Drosophila	382	69	GCA_002222885.1	NA	short	short	137224182	1	3966	3.6	89.7	0.5	90.2	6.2	3.6	100	512855	0.0037	2228	0	857288	0.0063	850145	0.0062	7868072	0.0573	2651914	0.0193	3522382	0.0257	0.216564	16264884	0.118528	0.216564	137224182	120959298	0.881472	2.36815e+06	3.9586e+06	3.92561e+06	823063	429	26653	33997	113	83	YES
Hemiptera	Aphrophoridae	Philaenus	361	NA_quality	GCA_002233535.1	NA	short	short	1248087067	9.1	319	2.5	5.9	0.2	6.1	12.1	81.8	100	20672507	0.0166	100361	0.0001	1205469	0.001	33386982	0.0267	10464335	0.0084	18597185	0.0149	246555464	0.1975	NA_quality	330982303	0.265192	NA_quality	1248087067	917104764	0.734808	NA_quality	NA_quality	NA_quality	33167516	99277	120189	3340477	80	63	NA_quality
Phasmatodea	Phasmatidae	Dryococelus	27	NA_quality	GCA_002236955.1	NA	short	short	3416447916	9.53	17257	4.24	45.4	1	46.4	30	23.6	100	138272309	0.0405	17218085	0.005	169493766	0.0497	332902225	0.0974	25499694	0.0075	112441111	0.0328	1418292852	0.4151	NA_quality	2214120042	0.648077	NA_quality	3416447916	1202327874	0.351923	NA_quality	NA_quality	NA_quality	169686798	3151	163212276	5921194	255	181	NA_quality
Diptera	Diopsidae	Teleopsis	530	107	GCA_002237135.1	NA	long	pacbio	620883900	36	64335	4.81	72.3	26	98.3	0.5	1.2	100	66417917	0.1068	264352	0.0004	31161757	0.0501	32203014	0.0518	23677435	0.0381	4964713	0.008	60515172	0.0974	0.276067	219204360	0.352585	0.276067	621706043	402501683	0.647415	2.40586e+08	1.12877e+08	1.16649e+08	32174777	1300	26937	321853	200	125	YES
Lepidoptera	Riodinidae	Calephelis	151	199	GCA_002245475.1	NA	short	short	855081797	242	16821	4.23	91.8	0.6	92.4	4.4	3.2	100	82126482	0.0961	115711236	0.1353	6074402	0.0071	40219711	0.047	6484383	0.0075	84064643	0.0984	158354283	0.1852	0.321183	493035140	0.576594	0.321183	855081797	362046657	0.423406	2.557e+08	1.89126e+07	1.25224e+08	40156306	701	62704	1189424	147	108	YES
Lepidoptera	Riodinidae	Calephelis	149	198	GCA_002245505.1	NA	short	short	808524533	239	18819	4.27	94.4	0.6	95	2.5	2.5	100	66314017	0.082	127323433	0.1575	3950520	0.0049	28615035	0.0354	5931997	0.0072	89242465	0.1104	134379479	0.1662	0.294849	455756946	0.56369	0.294849	808524533	352767587	0.43631	2.24908e+08	1.33985e+07	9.70498e+07	28547315	1090	66630	996515	149	108	YES
Hymenoptera	Pteromalidae	Trichomalopsis	207	415	GCA_002249905.1	NA	short	short	236426377	7	9965	4	96.7	0.9	97.6	1	1.4	100	9806913	0.0414	112548	0.0005	16844285	0.0712	12047614	0.0509	5596133	0.0236	3963695	0.0169	19907333	0.0842	0.291561	68278521	0.288723	0.291561	236484274	168205753	0.711277	3.36359e+07	5.77728e+07	4.13211e+07	5359283	133010	6555321	116989	179	125	YES
Coleoptera	Carabidae	Pogonus	570	300	GCA_002278615.1	NA	short	short	280876046	8	5623	3.75	92.9	0.8	93.7	3.2	3.1	100	2935899	0.0104	46629	0.0002	2600671	0.0093	9699453	0.0345	7653860	0.0272	1251678	0.0045	32478023	0.1157	0.573146	56666213	0.201748	0.573146	280876046	224209833	0.798252	5.12243e+06	4.53754e+06	1.69232e+07	7939764	1226094	533595	215985	160	109	YES
Orthoptera	Gryllidae	Laupala	31	523	GCA_002313205.1	NA	short	short	1595214429	159	45047	4.65	96.6	1.8	98.4	0.6	1	100	215385089	0.135	17633738	0.011	17872110	0.0112	74770435	0.0469	15472263	0.0097	59187798	0.0371	342851136	0.2149	0.461334	743172569	0.465876	0.461334	1595214429	852041860	0.534124	4.66874e+08	3.874e+07	1.62074e+08	71504209	1566	3264660	1812740	202	140	YES
Lepidoptera	Noctuidae	Heliothis	111	223	GCA_002382865.1	SRR5514913	long	pacbio	403154403	0	19807	4.3	86.8	2.6	89.4	2.2	8.4	100	16827468	0.0417	10978743	0.0272	2661239	0.0066	10863252	0.0269	3265735	0.008	40975505	0.1016	34685108	0.0861	0.288425	120257050	0.29829	NA_quality	403154403	282897353	0.70171	NA_quality	NA_quality	NA_quality	10824013	1053	38186	239763	156	117	NO
Lepidoptera	Noctuidae	Spodoptera	114	224	GCA_002706865.2	NA	short	short	438940887	97	68350	4.83	97.6	0.8	98.4	0.4	1.2	100	43613915	0.0994	18883739	0.043	3478333	0.008	8509675	0.0194	3620188	0.0082	22898365	0.0522	51480279	0.1173	0.33761	152484494	0.347392	0.33761	438940887	286456393	0.652608	1.29184e+08	1.03028e+07	2.52056e+07	8469402	558	39715	389081	151	115	YES
Collembola	Neanuridae	Holacanthella	553	545	GCA_002738285.1	NA	short	short	327566771	0	80495	4.91	82	6.9	88.9	1.4	9.7	100	5247282	0.016	4431	0	9742507	0.0298	28695900	0.0876	5385231	0.0165	1838619	0.0057	92710536	0.283	0.645506	143624506	0.438459	NA_quality	327566771	183942265	0.561541	NA_quality	NA_quality	NA_quality	22646474	7504	6041922	489132	203	144	NO
Phasmatodea	Phasmatidae	Clitarchus	28	516	GCA_002778355.1	NA	short	short	3802613888	274	46246	4.67	89.4	3.2	92.6	2.8	4.6	100	64729310	0.017	19959778	0.0052	118296670	0.0311	427065057	0.1123	23770359	0.0062	136868785	0.0361	1355087282	0.3563	0.631513	2145777241	0.564287	0.631513	3802633449	1656856208	0.435713	1.02499e+08	1.87322e+08	6.76256e+08	352811114	3949	74249994	6752750	214	159	YES
Hemiptera	Aphididae	Melanaphis	330	466	GCA_002803265.2	NA	short	short	300271876	5	275006	5.44	95.2	1.6	96.8	0.6	2.6	100	3681236	0.0123	2187	0	1091385	0.0036	19635962	0.0653	15494117	0.0515	896431	0.0029	13532563	0.0451	0.249063	54333881	0.18094	0.249063	300287294	245953413	0.81906	1.47803e+07	4.38196e+06	7.88393e+07	19186877	430	448655	33628	201	138	YES
Hymenoptera	Apidae	Lepidotrigona	283	330	GCA_002806875.1	NA	short	short	333080613	6	6124	3.79	93.3	0.8	94.1	3.1	2.8	100	3448496	0.0103	1614	0	4286983	0.0129	9802815	0.0295	12389851	0.0372	1329874	0.0039	72602343	0.218	0.699027	103861976	0.311822	0.699027	333080613	229218637	0.688178	4.93328e+06	6.13278e+06	1.40235e+07	9788566	904	13345	337074	242	148	YES
Diptera	Culicidae	Anopheles	412	150	GCA_002846955.1	NA	short	short	162944031	1	14431	4.16	97.7	0.6	98.3	0.9	0.8	100	271001	0.0017	1436	0	421544	0.0026	1272940	0.0078	4498886	0.0276	62791	0.0003	2382594	0.0146	0.267371	8911192	0.0546887	0.267371	162944031	154032839	0.945311	1.01358e+06	1.57663e+06	4.76095e+06	1263080	215	9645	24681	101	71	YES
Blattodea	Kalotermitidae	Cryptotermes	599	517	GCA_002891405.2	NA	short	short	1018932804	239	63940	4.81	96.3	1.4	97.7	0.9	1.4	100	110176401	0.1081	144626913	0.142	20465631	0.02	81816757	0.0803	8706838	0.0085	126692152	0.1243	185494032	0.1821	0.273599	677978724	0.665381	0.273599	1018932804	340954080	0.334619	4.02694e+08	7.48017e+07	2.99039e+08	81811105	536	5116	1399373	150	118	YES
Lepidoptera	Hesperiidae	Cecropterus	134	207	GCA_002930495.1	NA	short	short	566818879	123	7706	3.89	96.5	0.4	96.9	1.3	1.8	100	28770533	0.0508	72884684	0.1286	2148828	0.0037	16569979	0.0293	6211061	0.011	48711949	0.0859	53105398	0.0937	0.232508	228402432	0.402944	0.232508	566834491	338432059	0.597056	1.2374e+08	9.24195e+06	7.12663e+07	16536163	14473	19343	442153	131	100	YES
Coleoptera	Curculionidae	Sitophilus	585	265	GCA_002938485.2	NA	long	pacb_oxford	770550206	215	1039787	6.02	96.6	1.9	98.5	0.4	1.1	100	91054991	0.1182	1789519	0.0023	18916395	0.0246	130013609	0.1687	6771869	0.0088	31302823	0.0405	276482595	0.3589	0.496974	556331801	0.721993	0.496974	770550206	214218405	0.278007	1.83219e+08	3.80631e+07	2.6161e+08	121816572	6052374	2144663	1089858	267	150	YES
Lepidoptera	Nymphalidae	Vanessa	93	190	GCA_002938995.1	NA	short	short	357124929	30	254123	5.41	98	0.4	98.4	0.7	0.9	100	28225896	0.079	31121587	0.0871	1325405	0.0037	4755060	0.0133	5650954	0.0158	18497363	0.0518	22992791	0.0644	0.204255	112569056	0.315209	0.204255	357124929	244555873	0.684791	1.3819e+08	6.48897e+06	2.328e+07	4750105	312	4643	172702	142	112	YES
Blattodea	Blattidae	Periplaneta	601	520	GCA_002939525.1	NA	short	short	3374840130	363	50814	4.71	87.9	5.3	93.2	4.1	2.7	100	451012855	0.1336	111649203	0.033	15044272	0.0044	536888574	0.1591	71752322	0.0212	129863406	0.0384	918829411	0.2723	0.411102	2235040043	0.662265	0.411102	3374840130	1139800087	0.337735	1.09708e+09	3.6595e+07	1.30597e+09	508411057	28230609	246908	4238812	226	154	YES
Trichoptera	Sericostomatidae	Sericostoma	5	NA_quality	GCA_003003475.1	NA	short	short	1015727762	9.01	2112	3.32	35.6	0.3	35.9	38.3	25.8	100	151971823	0.1497	7493400	0.0074	2032316	0.002	85376877	0.084	10678816	0.0104	18727873	0.0184	227549095	0.2241	NA_quality	503830200	0.496029	NA_quality	1015727762	511897562	0.503971	NA_quality	NA_quality	NA_quality	84531927	1422	843528	2045052	125	99	NA_quality
Phasmatodea	Phasmatidae	Medauroidea	26	515	GCA_003012365.1	NA	short	short	2593359413	0	28251	4.45	65.5	0.3	65.8	22.4	11.8	100	71421701	0.0276	40374710	0.0155	93931742	0.0362	174754470	0.0674	24966768	0.0096	134981302	0.052	1023678012	0.3947	0.65448	1564108705	0.603121	NA_quality	2593359413	1029250708	0.396879	NA_quality	NA_quality	NA_quality	152467795	3102	22283573	4448163	244	188	NO
Coleoptera	Chrysomelidae	Diabrotica	596	268	GCA_003013835.2	NA	short	short	2418073815	348	6238	3.8	89.9	2	91.9	4.8	3.3	100	349266783	0.1445	5925135	0.0024	19894430	0.0082	274826321	0.1137	11334314	0.0047	34865356	0.0144	782757605	0.3237	0.529294	1478869944	0.61159	0.529294	2418073815	939203871	0.38841	6.59872e+08	3.75867e+07	5.19231e+08	254624719	18457989	1743613	3670899	229	155	YES
Coleoptera	Staphylinidae	Aleochara	555	290	GCA_003054995.1	NA	short	short	85899700	2	12135	4.08	93.3	0.4	93.7	3.5	2.8	100	926595	0.0108	34732	0.0004	1031532	0.012	735673	0.0086	1974061	0.023	373966	0.0044	2608503	0.0303	0.339425	7685062	0.0894655	0.339425	85899700	78214638	0.910534	2.7299e+06	3.03906e+06	2.16741e+06	672396	243	63034	16956	159	110	YES
Hymenoptera	Bethylidae	Goniozus	160	409	GCA_003055095.1	NA	short	short	140141882	1	37816	4.58	98.6	0.8	99.4	0.2	0.4	100	548910	0.0039	1871	0	1376046	0.0098	1925262	0.0137	3482255	0.0248	238945	0.0018	8246651	0.0589	0.521282	15819940	0.112885	0.521282	140141882	124321942	0.887115	1.053e+06	2.63973e+06	3.69332e+06	1739453	94220	91589	55926	155	111	YES
Diptera	Rhinophoridae	Paykullia	510	92	GCA_003055125.1	NA	short	short	422395093	26	5917	3.77	91.9	0.5	92.4	4.1	3.5	100	11341584	0.0269	258657	0.0006	8735475	0.0207	22271896	0.0528	11630305	0.0275	23857771	0.0563	99812448	0.2363	0.561034	177908136	0.421189	0.561034	422395093	244486957	0.578811	2.02155e+07	1.55703e+07	3.9698e+07	21133764	8596	1129536	738179	149	107	YES
Hymenoptera	Formicidae	Aphaenogaster	287	376	GCA_003063725.1	NA	short	short	342642954	27	20738	4.32	98.5	0.3	98.8	0.5	0.7	100	4215746	0.0123	102698	0.0003	6945256	0.0202	18483578	0.0539	6538930	0.019	3289979	0.0096	30103456	0.0879	0.432027	69679643	0.203359	0.432027	342642954	272963311	0.796641	9.75807e+06	1.6076e+07	4.27834e+07	17573474	95306	814798	206106	155	123	YES
Hymenoptera	Formicidae	Aphaenogaster	303	378	GCA_003063745.1	NA	short	short	429703865	29	18941	4.28	98.6	0.4	99	0.2	0.8	100	5204633	0.0121	116940	0.0003	8355212	0.0194	23080829	0.0537	6857260	0.0159	4366096	0.0101	36634262	0.0853	0.432951	84615232	0.196915	0.432951	429703865	345088633	0.803085	1.20213e+07	1.92983e+07	5.33105e+07	21431079	78845	1570905	248275	156	123	YES
Hymenoptera	Formicidae	Aphaenogaster	289	375	GCA_003063765.1	NA	short	short	346134187	26	15753	4.2	97.5	0.5	98	0.8	1.2	100	3173645	0.0091	101380	0.0003	5068107	0.0146	14299376	0.0413	6130768	0.0177	2302959	0.0068	23242815	0.0672	0.427894	54319050	0.156931	0.427894	346134187	291815137	0.843069	7.41689e+06	1.18443e+07	3.3418e+07	13711019	81407	506950	164346	148	120	YES
Hymenoptera	Formicidae	Aphaenogaster	272	379	GCA_003063805.1	NA	short	short	310333780	23	21672	4.34	98.6	0.7	99.3	0.1	0.6	100	2921434	0.0094	23930	0.0001	5209491	0.0167	16161461	0.052	6309119	0.0204	2435969	0.0079	26275766	0.0847	0.442821	59337170	0.191204	0.442821	310333780	250996610	0.808796	6.59732e+06	1.17643e+07	3.64966e+07	15714485	82941	364035	183046	150	120	YES
Hymenoptera	Formicidae	Aphaenogaster	294	377	GCA_003063835.1	NA	short	short	382861007	21	23448	4.37	98.5	0.4	98.9	0.3	0.8	100	4698517	0.0123	140228	0.0004	7293734	0.019	21407409	0.0559	6761596	0.0177	3609308	0.0094	35127903	0.0918	0.444439	79038695	0.206442	0.444439	382861007	303822312	0.793558	1.05718e+07	1.64111e+07	4.81672e+07	20116794	77072	1213543	238006	156	124	YES
Hymenoptera	Formicidae	Aphaenogaster	299	374	GCA_003063865.1	NA	short	short	386044929	32	15430	4.19	98	0.6	98.6	0.8	0.6	100	3949141	0.0103	119503	0.0003	6574849	0.017	17584387	0.0456	6343814	0.0164	3008962	0.0077	29033072	0.0752	0.435842	66613728	0.172554	0.435842	386044929	319431201	0.827446	9.06094e+06	1.50854e+07	4.03458e+07	16806260	77579	700548	199887	152	120	YES
Hymenoptera	Formicidae	Temnothorax	269	371	GCA_003070985.1	NA	short	short	303539295	17	38942	4.59	88.4	6.6	95	1.2	3.8	100	8111109	0.0267	673219	0.0022	13567666	0.0447	18929048	0.0623	6808080	0.0224	3859331	0.0126	34492232	0.1136	0.399028	86440685	0.284776	0.399028	303539295	217098610	0.715224	2.03272e+07	3.40018e+07	4.74379e+07	14433708	381091	4114249	161298	227	138	YES
Diptera	Drosophilidae	Drosophila	434	57	GCA_003086615.1	NA	short	short	183585048	1	6978	3.84	95.5	0.9	96.4	1.5	2.1	100	2816988	0.0154	1308	0	8287562	0.0452	836654	0.0046	8903271	0.0485	8814607	0.0481	4987810	0.0272	0.143956	34648200	0.188731	0.143956	183585048	148936848	0.811269	1.95684e+07	5.75702e+07	5.81188e+06	750511	2709	83434	47521	111	85	YES
Lepidoptera	Papilionidae	Papilio	55	214	GCA_003118335.3	NA	short	short	232528895	44	11856	4.07	95.8	1.1	96.9	1.9	1.2	100	9045407	0.0389	2576745	0.0111	325203	0.0014	2351417	0.0101	2396143	0.0103	26415658	0.1136	10227194	0.044	0.191744	53337767	0.229366	0.191744	232544191	179206424	0.770634	4.71744e+07	1.69603e+06	1.22633e+07	2344927	3808	2682	93571	114	98	YES
Diptera	Muscidae	Haematobia	534	98	GCA_003123925.1	SRR6231656	long	pacbio	1143537531	0	5359	3.73	63.6	0.8	64.4	9.8	25.8	100	26344173	0.023	3902310	0.0034	5761333	0.005	39765284	0.0348	9098910	0.0079	56093518	0.0491	191074411	0.1671	0.575456	332039939	0.290362	NA_quality	1143537531	811497592	0.709638	NA_quality	NA_quality	NA_quality	39580757	130169	54358	868021	252	138	NO
Hymenoptera	Formicidae	Harpegnathos	282	397	GCA_003227715.1	NA	long	pacbio	334536844	29	911506	5.96	98	1.2	99.2	0.1	0.7	100	9869534	0.0295	139515	0.0004	10936423	0.0327	57808645	0.1728	13876463	0.0415	7332869	0.0219	35391189	0.1058	0.26147	135354638	0.404603	0.26147	334536844	199182206	0.595397	3.77463e+07	4.18267e+07	2.21091e+08	52465203	828518	4514924	171145	224	140	YES
Hymenoptera	Formicidae	Camponotus	253	385	GCA_003227725.1	NA	long	pacbio	284009182	6	1278439	6.11	98.8	0.4	99.2	0.4	0.4	100	4997516	0.0176	258890	0.0009	13681674	0.0482	31437344	0.1107	10682173	0.0377	2979021	0.0104	27193401	0.0957	0.298075	91230019	0.321222	0.298075	284009182	192779163	0.678778	1.6766e+07	4.59001e+07	1.05468e+08	21908752	306397	9222195	95588	304	155	YES
Hymenoptera	Apidae	Apis	198	337	GCA_003254395.2	NA	long	hi-c	225234541	1	5382476	6.73	99.3	0.1	99.4	0.1	0.5	100	100156	0.0005	1958	0	353869	0.0015	3648185	0.0162	13253845	0.0588	113497	0.0005	8281848	0.0368	0.321583	25753358	0.114332	0.321583	225251012	199497654	0.885668	311447	1.1004e+06	1.13445e+07	3640635	152	7398	37063	240	141	YES
Hemiptera	Pseudococcidae	Maconellicoccus	322	480	GCA_003261595.1	NA	long	pacbio	189239095	6	50278	4.7	90.4	5.1	95.5	1.1	3.4	100	533784	0.0028	1750	0	1080460	0.0057	5434169	0.0287	5061516	0.0268	274326	0.0015	23772064	0.1256	0.657448	36158069	0.191071	0.657448	189239095	153081026	0.808929	811903	1.64341e+06	8.26554e+06	5373117	33012	28040	116324	218	146	YES
Hemiptera	Aphididae	Schizaphis	340	465	GCA_003264975.1	NA	short	short	385164702	20	54539	4.74	91.4	3.2	94.6	1.6	3.8	100	6025803	0.0156	27851	0.0001	7035615	0.0183	37470762	0.0973	16541749	0.043	1668540	0.0042	36005802	0.0935	0.343645	104776122	0.271982	0.343645	385232317	280456195	0.728018	1.7535e+07	2.04735e+07	1.09039e+08	33594895	7293	3868574	84570	221	131	YES
Hemiptera	Aphididae	Sipha	338	473	GCA_003268045.1	NA	short	short	353179758	19	163055	5.21	92.9	1	93.9	0.6	5.5	100	13395650	0.0379	2109	0	1989887	0.0057	42775054	0.1211	12403982	0.035	4189239	0.0118	34160380	0.0967	0.313639	108916301	0.308381	0.313639	353187871	244271570	0.691619	4.27104e+07	6.34452e+06	1.36383e+08	42049341	306604	419109	171755	196	143	YES
Diptera	Drosophilidae	Scaptodrosophila	474	75	GCA_003285725.2	NA	long	pacbio	247077949	18	7854782	6.9	97.7	1.6	99.3	0.2	0.5	100	12770418	0.0517	1801	0	26655230	0.1079	6271457	0.0254	8958402	0.0362	22973956	0.093	12815663	0.0519	0.141693	90446927	0.366066	0.141693	247077949	156631022	0.633934	9.01276e+07	1.8812e+08	4.4261e+07	5748022	84385	439050	76406	186	93	YES
Diptera	Drosophilidae	Drosophila	430	54	GCA_003285875.3	NA	long	pacbio	177223868	5	3158326	6.5	97.3	1.4	98.7	0.1	1.2	100	6471168	0.0365	91509	0.0005	10527135	0.0594	4761306	0.0268	9412617	0.0531	11843036	0.0668	11467939	0.0648	0.210133	54574710	0.307942	0.210133	177223868	122649158	0.692058	3.07956e+07	5.00975e+07	2.26586e+07	4696722	10604	53980	52352	276	113	YES
Diptera	Drosophilidae	Drosophila	401	61	GCA_003285905.2	NA	long	pacbio	153741574	10	3367158	6.53	97	2.2	99.2	0.1	0.7	100	2818832	0.0184	2215	0	6106018	0.0397	2913036	0.019	12071640	0.0785	2560606	0.0166	3985478	0.026	0.130852	30457825	0.198111	0.130852	153741574	123283749	0.801889	2.15421e+07	4.66634e+07	2.2262e+07	2720578	301	192157	21338	199	82	YES
Diptera	Drosophilidae	Drosophila	464	40	GCA_003285975.3	NA	long	pacbio	217108776	10	6212830	6.79	98.7	0.6	99.3	0.1	0.6	100	21533877	0.0992	2148	0	49536268	0.2281	8362593	0.0385	6022465	0.0277	10434770	0.048	9807375	0.0452	0.0927854	105699496	0.48685	0.0927855	217108776	111409280	0.51315	2.32082e+08	5.3388e+08	9.01283e+07	8123464	175	238954	59712	201	83	YES
Diptera	Drosophilidae	Drosophila	449	44	GCA_003286085.2	NA	long	pacbio	195512972	11	5212974	6.72	97.4	2.1	99.5	0.1	0.4	100	15689154	0.0802	4515	0	34499055	0.1764	3659178	0.0187	8237416	0.0422	7884566	0.0402	9738178	0.0498	0.122167	79712062	0.407707	0.122167	195512972	115800910	0.592293	1.28424e+08	2.82393e+08	2.99523e+07	2737010	18297	903871	39364	264	128	YES
Diptera	Drosophilidae	Drosophila	391	29	GCA_003286155.2	NA	long	pacbio	146538397	7	22146549	7.35	99.2	0.6	99.8	0.1	0.1	100	3722319	0.0254	447	0	19873961	0.1356	2012754	0.0137	4776515	0.0326	5314227	0.0363	1423224	0.0097	0.0383376	37123447	0.253336	0.0383376	146538397	109414950	0.746664	9.70932e+07	5.18393e+08	5.25008e+07	1930460	12085	70209	8840	173	98	YES
Plecoptera	Nemouridae	Lednia	13	522	GCA_003287335.1	NA	short	short	304502267	0	4212	3.62	69.1	0.4	69.5	20.7	9.8	100	2404667	0.0079	13315755	0.0437	927435	0.003	5742307	0.0189	12829396	0.0421	2140070	0.007	88494920	0.2906	0.703152	125854550	0.413312	NA_quality	304502267	178647717	0.586688	NA_quality	NA_quality	NA_quality	5716478	7539	18290	683809	141	104	NO
Hymenoptera	Apidae	Apis	204	333	GCA_003314205.1	NA	long	pacbio	227019819	1	5131172	6.71	99.6	0	99.6	0	0.4	100	156248	0.0007	2027	0	956350	0.0042	4563961	0.0201	13265040	0.0585	187058	0.0008	9738577	0.0429	0.337334	28869261	0.127157	0.337334	227036473	198167212	0.872843	463185	2.83503e+06	1.35295e+07	4556713	371	6877	36737	280	166	YES
Hemiptera	Delphacidae	Laodelphax	347	498	GCA_003335185.2	SRR5830088	long	pacbio	539918070	99	119723	5.08	93.6	2.3	95.9	2	2.1	100	9711355	0.018	2533760	0.0047	1829211	0.0034	11232233	0.0208	19501057	0.0361	3489688	0.0065	94977683	0.1759	0.662905	143274987	0.265364	0.662905	539918070	396643083	0.734636	1.46497e+07	2.75939e+06	1.6944e+07	10545571	83674	602988	763211	133	101	YES
Trichoptera	Glossosomatidae	Glossosoma	4	260	GCA_003347265.1	NA	short	short	604293666	0	14418	4.16	83.6	0.9	84.5	10.5	5	100	86839528	0.1437	26756746	0.0443	372137	0.0006	21180177	0.0351	10290123	0.017	7866437	0.013	105143328	0.174	0.406825	258448476	0.427687	NA_quality	604293666	345845190	0.572313	NA_quality	NA_quality	NA_quality	21172850	635	6692	759790	152	117	NO
Diptera	Drosophilidae	Drosophila	483	45	GCA_003369915.2	NA	long	pacbio	287096000	35	11978448	7.08	84.6	14.7	99.3	0.2	0.5	100	34855096	0.1214	3921	0	64600581	0.2251	6811135	0.0237	9136432	0.0318	19438663	0.0677	17270203	0.0601	0.113533	152116031	0.529844	0.113533	287096000	134979969	0.470156	3.07004e+08	5.69002e+08	5.99925e+07	5500204	229	1310702	53154	354	123	YES
Diptera	Drosophilidae	Drosophila	385	27	GCA_003401745.1	NA	long	pacbio	140668701	2	22407379	7.35	98.9	1	99.9	0	0.1	100	8202310	0.0583	2241	0	14102816	0.1002	1919630	0.0136	6515477	0.0463	1162276	0.0083	590693	0.0042	0.0181777	32495443	0.230977	0.0181777	140687039	108191596	0.769023	4.51229e+08	7.7583e+08	1.05603e+08	1890682	312	28636	4390	142	82	YES
Lepidoptera	Tortricidae	Cydia	148	251	GCA_003425675.2	NA	long	hi-c	772891954	238	823676	5.92	90.1	4.5	94.6	1.2	4.2	100	73407887	0.0949	29067969	0.0376	18510596	0.0239	31028597	0.0402	5049487	0.0064	40995024	0.053	180691859	0.2338	0.477072	378751419	0.490044	0.477072	772891954	394140535	0.509956	1.53872e+08	3.88004e+07	6.50396e+07	28600761	1321750	1106086	1241428	154	110	YES
Siphonaptera	Pulicidae	Ctenocephalides	11	163	GCA_003426905.1	NA	long	pacbio	775452550	127	61000	4.79	74.5	20.5	95	0.9	4.1	100	51352269	0.0663	4535591	0.0058	19417972	0.025	64784461	0.0835	18598864	0.024	67334453	0.0869	184196531	0.2375	0.449019	410220141	0.529007	0.449019	775452550	365232409	0.470993	1.14366e+08	4.32453e+07	1.4428e+08	64174462	1941	608058	963722	217	133	YES
Archaeognatha	Machilidae	Machilis	602	532	GCA_003456935.1	NA	short	short	2144507099	0	2401	3.38	57.5	0.4	57.9	22.3	19.8	100	65349312	0.0304	33701404	0.0157	21634374	0.0101	169959346	0.0793	5890732	0.0028	23771911	0.011	430304088	0.2007	0.573272	750611167	0.350016	NA_quality	2144507099	1393895932	0.649984	NA_quality	NA_quality	NA_quality	159199956	524962	10234428	2863027	160	115	NO
Coleoptera	Coccinellidae	Coccinella	577	280	GCA_003568925.1	NA	short	short	514957465	89	21314	4.33	89.9	5.9	95.8	1.8	2.4	100	57628020	0.1119	4597	0	18903568	0.0367	66410711	0.129	1756646	0.0034	7365609	0.0143	119473306	0.232	0.43998	271542457	0.52731	0.43998	514957465	243415008	0.47269	1.30979e+08	4.29646e+07	1.5094e+08	60385512	4882098	1143101	553470	226	133	YES
Lepidoptera	Cosmopterigidae	Hyposmocoma	147	247	GCA_003589595.1	NA	short	short	731440758	166	58944	4.77	91.9	1	92.9	2.4	4.7	100	101350590	0.1386	39987161	0.0547	17215570	0.0235	37636281	0.0515	4741747	0.0064	27508677	0.0375	167468528	0.2289	0.422998	395908554	0.541272	0.422998	731440758	335532204	0.458728	2.39601e+08	4.06989e+07	8.89751e+07	35907371	786925	941985	1187992	152	110	YES
Lepidoptera	Noctuidae	Trichoplusia	98	227	GCA_003590095.1	NA	long	pacbio	368211209	34	621965	5.79	93.1	4.6	97.7	0.4	1.9	100	16822440	0.0457	6529436	0.0177	6008116	0.0163	4661095	0.0126	2925557	0.008	24527648	0.0665	20939875	0.0568	0.254081	82414167	0.223814	0.254081	368226961	285812794	0.776186	6.6209e+07	2.36465e+07	1.83449e+07	3958653	16941	685501	165611	136	107	YES
Hymenoptera	Formicidae	Solenopsis	286	365	GCA_003595255.1	NA	short	short	335323959	14	13777	4.14	93.5	0.4	93.9	3	3.1	100	10750194	0.032	165408	0.0005	11092115	0.033	42473766	0.1266	6947135	0.0207	5115242	0.0152	60748649	0.1811	0.442476	137292509	0.409432	0.442476	335323959	198031450	0.590568	2.42955e+07	2.50683e+07	9.59911e+07	38307644	364181	3801941	370483	175	126	YES
Hymenoptera	Formicidae	Formica	245	382	GCA_003651465.1	NA	short	short	277633851	14	24299	4.39	95.2	3.4	98.6	1	0.4	100	3029223	0.0109	255295	0.0009	6454895	0.0232	13626245	0.0491	8658789	0.0311	1253909	0.0045	16863737	0.0607	0.336319	50142093	0.180605	0.336319	277633851	227491758	0.819395	9.00699e+06	1.91928e+07	4.05158e+07	10985463	68293	2572489	94192	190	129	YES
Hemiptera	Pentatomidae	Euschistus	362	494	GCA_003667255.1	NA	long	pacbio	1325158962	0	2463424	6.39	78.7	3.1	81.8	3.7	14.5	100	295566924	0.223	10191997	0.0077	51605090	0.039	164649255	0.1242	30636332	0.0231	50343050	0.038	266639439	0.2012	0.306612	869632087	0.656247	NA_quality	1325158962	455526875	0.343753	NA_quality	NA_quality	NA_quality	163945399	627909	75947	1424274	206	143	NO
Lepidoptera	Hesperiidae	Megathymus	113	209	GCA_003671415.1	NA	short	short	429427782	48	92816	4.97	98.3	0.2	98.5	0.4	1.1	100	40254929	0.0938	20524484	0.0478	5318183	0.0124	10558697	0.0246	5350388	0.0125	26154580	0.0609	33371958	0.0777	0.235789	141533219	0.329586	0.235789	429427782	287894563	0.670414	1.70724e+08	2.25549e+07	4.47803e+07	10175811	72252	310634	207166	169	122	YES
Hymenoptera	Formicidae	Ooceraea	192	389	GCA_003672135.1	NA	long	pacb_oxford	223876465	20	3735272	6.57	98.1	1	99.1	0.2	0.7	100	2035598	0.0091	16168	0.0001	4182615	0.0187	21195037	0.0947	5037475	0.0225	2604755	0.0117	11354472	0.0507	0.244571	46426120	0.207358	0.244571	223893814	177467694	0.792642	8.32315e+06	1.71019e+07	8.66622e+07	19635790	67669	1491578	42018	282	146	YES
Hemiptera	Aphididae	Rhopalosiphum	333	464	GCA_003676215.3	NA	long	pacbio	326023155	10	9046396	6.96	94.9	2.2	97.1	0.7	2.2	100	3025353	0.0092	851	0	1326982	0.0041	24190325	0.0742	15196907	0.0467	748124	0.0023	30889537	0.0947	0.409795	75378079	0.231205	0.409795	326023155	250645076	0.768795	7.38261e+06	3.23816e+06	5.90304e+07	23799969	509	389847	78864	304	143	YES
Lepidoptera	Erebidae	Hyphantria	132	228	GCA_003709505.1	NA	short	short	510511702	115	152331	5.18	97	0.7	97.7	0.7	1.6	100	62906389	0.1232	42191199	0.0826	4522571	0.0088	13412294	0.0263	4845265	0.0094	39993246	0.0784	41589621	0.0814	0.198556	209460585	0.410295	0.198556	510511702	301051117	0.589705	3.1682e+08	2.27773e+07	6.75492e+07	13363763	43920	4611	306168	146	109	YES
Hymenoptera	Halictidae	Nomia	277	352	GCA_003710045.1	NA	short	short	325881203	5	28892	4.46	98.8	0.2	99	0.4	0.6	100	1963856	0.0061	2282	0	1665253	0.0051	13759079	0.0423	4852234	0.0149	2981709	0.0091	56069957	0.172	0.689715	81294370	0.24946	0.689715	325881203	244586833	0.75054	2.84734e+06	2.41441e+06	1.99489e+07	13725560	498	33021	348275	164	151	YES
Diptera	Culicidae	Anopheles	514	138	GCA_003951495.1	NA	long	pacbio	444530063	23	107489	5.03	57.9	41.7	99.6	0.1	0.3	100	13730367	0.0309	3424905	0.0077	20358850	0.0458	9812843	0.0221	5649283	0.0127	4816450	0.0109	55439909	0.1247	0.489611	113232607	0.254716	0.489611	444543995	331311388	0.745284	2.80434e+07	4.15817e+07	2.00421e+07	9740048	399	72396	104109	551	228	YES
Diptera	Drosophilidae	Scaptomyza	461	68	GCA_003952975.1	NA	short	short	214836881	13	58829	4.77	94.3	4.7	99	0.4	0.6	100	16083763	0.0749	664777	0.0031	13464492	0.0627	7650780	0.0356	7600341	0.0354	15428413	0.0718	14377764	0.0669	0.191015	75270330	0.35036	0.191015	214836881	139566551	0.64964	8.42016e+07	7.04892e+07	4.00533e+07	6990700	9324	650756	80327	192	122	YES
Lepidoptera	Bombycidae	Bombyx	107	236	GCA_003987935.1	NA	short	short	398573003	208	322127	5.51	93.9	0.6	94.5	0.3	5.2	100	57018176	0.143	41997039	0.1053	4382322	0.011	20275376	0.0509	3531309	0.0088	24920404	0.0624	29214649	0.0733	0.161105	181339275	0.454971	0.161105	398573003	217233728	0.545029	3.5392e+08	2.72017e+07	1.25852e+08	20269503	721	5152	175588	173	136	YES
Lepidoptera	Crambidae	Chilo	150	242	GCA_004000445.1	SRR8238484	long	pacbio	824354176	220	642389	5.81	94.5	1.9	96.4	1.2	2.4	100	91096967	0.1105	38804881	0.0471	21719400	0.0263	44368691	0.0539	5884887	0.007	66982161	0.0812	188623170	0.2288	0.412309	457480157	0.554956	0.412309	824354176	366874019	0.445044	2.20943e+08	5.26775e+07	1.0761e+08	42947730	1268431	152530	1163153	171	119	YES
Hemiptera	Aphididae	Aphis	327	462	GCA_004010815.1	NA	short	short	294262857	6	77071	4.89	88.8	4.1	92.9	2.3	4.8	100	1772748	0.006	1767	0	723867	0.0024	12845766	0.0437	14663106	0.0498	604694	0.002	13399427	0.0456	0.304454	44011375	0.149565	0.304454	294262857	250251482	0.850435	5.82272e+06	2.37759e+06	4.21928e+07	12769818	621	75327	33584	161	115	YES
Collembola	Entomobryidae	Sinella	554	536	GCA_004115045.2	NA	long	pacbio	364329999	6	821727	5.91	88.2	2.1	90.3	1.2	8.5	100	2601290	0.0071	9937	0	8583911	0.0235	2186487	0.006	5169209	0.0142	899537	0.0024	26863288	0.0737	0.580029	46313659	0.12712	0.580029	364329999	318016340	0.87288	4.48475e+06	1.47991e+07	3.76961e+06	1820099	618	365770	82735	333	202	YES
Lepidoptera	Lymantriidae	Lymantria	152	230	GCA_004115105.1	NA	short	short	864963299	263	15453	4.19	89.8	0.5	90.3	4.3	5.4	100	243798035	0.2819	24155843	0.0279	8681637	0.01	34859630	0.0403	5132769	0.0059	91932011	0.1062	124488128	0.144	0.23354	533048053	0.616267	0.23354	864963299	331915246	0.383733	1.04392e+09	3.71741e+07	1.49266e+08	34570715	1106	287809	854536	160	121	YES
Diptera	Culicidae	Anopheles	477	130	GCA_004136515.2	NA	long	pacbio	251398820	31	3468756	6.54	60.9	38.4	99.3	0.2	0.5	100	16301353	0.0479	3472298	0.0102	17078445	0.0501	25355215	0.0745	8887564	0.0261	2802109	0.0082	17481235	0.0513	0.191306	91378219	0.26832	0.191306	340556243	249178024	0.73168	8.52107e+07	8.92727e+07	1.32537e+08	25135873	94479	124863	83701	221	117	YES
Coleoptera	Scarabaeidae	Protaetia	595	288	GCA_004143645.1	NA	long	pacbio	1143903595	206	318221	5.5	64.4	32.7	97.1	1.4	1.5	100	150727121	0.1318	1602958	0.0014	23497970	0.0205	165448584	0.1447	9205102	0.008	26507358	0.0231	337748610	0.2953	0.472549	714737703	0.624812	0.472549	1143923906	429186203	0.375188	3.18966e+08	4.9726e+07	3.50119e+08	158533340	4407938	2507306	1419970	249	144	YES
Diptera	Drosophilidae	Drosophila	396	64	GCA_004143765.1	NA	short	short	149951920	4	18202	4.26	97.7	1.2	98.9	0.4	0.7	100	768700	0.0051	2775	0	2482805	0.0166	1229319	0.0082	9668345	0.0645	6017477	0.0402	4023702	0.0269	0.166316	24193123	0.161339	0.166316	149951920	125758797	0.838661	4.62193e+06	1.49282e+07	7.39147e+06	924427	11418	293474	27166	161	92	YES
Diptera	Drosophilidae	Drosophila	429	65	GCA_004143805.1	NA	short	short	179073841	7	18538	4.27	95.4	2	97.4	0.7	1.9	100	3204904	0.0179	2682	0	3817974	0.0213	1816398	0.0102	8982553	0.0501	7419574	0.0414	6365001	0.0356	0.201366	31609086	0.176514	0.201366	179073841	147464755	0.823486	1.59158e+07	1.89604e+07	9.02037e+06	1404722	1618	410058	44778	149	93	YES
Diptera	Drosophilidae	Drosophila	407	63	GCA_004143825.1	NA	short	short	156838486	5	49440	4.69	97.8	0.8	98.6	0.4	1	100	2855670	0.0182	1550	0	5565573	0.0355	2310932	0.0147	9270923	0.059	10620426	0.0677	6103330	0.039	0.166175	36728404	0.23418	0.166175	156838486	120110082	0.76582	1.71848e+07	3.34923e+07	1.39066e+07	1627646	12248	671038	39203	170	108	YES
Diptera	Drosophilidae	Drosophila	403	66	GCA_004143845.1	NA	short	short	154130906	4	144683	5.16	97.2	1	98.2	0.5	1.3	100	5805886	0.0377	5240	0	6659085	0.0432	1290499	0.0084	10805015	0.0701	689078	0.0045	3517143	0.0229	0.122242	28771946	0.186672	0.122242	154130906	125358960	0.813328	4.7495e+07	5.44746e+07	1.05569e+07	1266061	11790	12648	21338	171	96	YES
Diptera	Drosophilidae	Drosophila	411	62	GCA_004149445.1	NA	short	short	162543777	6	60665	4.78	97.8	1.2	99	0.1	0.9	100	3336999	0.0205	2831	0	3223624	0.0199	2793116	0.0172	9963686	0.0613	7436648	0.0457	5654585	0.0348	0.174462	32411489	0.199402	0.174462	162543777	130132288	0.800598	1.91273e+07	1.84775e+07	1.60098e+07	2355229	211	437676	37539	160	97	YES
Hymenoptera	Megachilidae	Osmia	184	347	GCA_004153925.1	NA	short	short	210591136	8	454559	5.66	99	0.4	99.4	0.1	0.5	100	13490511	0.064	75825	0.0004	5111255	0.0243	8419955	0.04	3317994	0.0158	1760101	0.0083	23339421	0.1108	0.420416	55515062	0.263615	0.420416	210591136	155076074	0.736385	3.20885e+07	1.21576e+07	2.00277e+07	7841490	19594	558871	109347	234	139	YES
Coleoptera	Tenebrionidae	Asbolus	565	276	GCA_004193795.1	NA	short	short	249608069	6	4550	3.66	92	1	93	3.3	3.7	100	5638994	0.0226	135554	0.0005	1625574	0.0066	13524464	0.0542	2514805	0.01	309179	0.0013	43932522	0.176	0.649111	67681092	0.271149	0.649111	249608069	181926977	0.728851	8.68726e+06	2.50431e+06	2.08354e+07	11756698	884277	883489	313195	149	112	YES
Lepidoptera	Crambidae	Ostrinia	115	239	GCA_004193835.1	NA	short	short	437279933	145	474742	5.68	96.9	1	97.9	0.6	1.5	100	32315531	0.0739	5092937	0.0116	5696132	0.013	16556444	0.0379	3469988	0.0079	19029919	0.0435	75914654	0.1736	0.480243	158075605	0.361498	0.480243	437279933	279204328	0.638502	6.729e+07	1.18609e+07	3.44752e+07	16289676	8568	258200	498641	159	112	YES
Lepidoptera	Noctuidae	Agrotis	129	220	GCA_004193855.1	NA	short	short	486925161	98	820105	5.91	97.1	0.8	97.9	0.5	1.6	100	52650040	0.1081	16005567	0.0328	5176464	0.0107	10844465	0.0223	3684436	0.0075	24013029	0.0493	78643673	0.1615	0.411709	191017674	0.392294	0.411709	486925161	295907487	0.607706	1.27882e+08	1.25731e+07	2.63401e+07	10749427	8500	86538	569624	147	113	YES
Hymenoptera	Formicidae	Cataglyphis	178	384	GCA_004195275.1	NA	short	short	198942706	1	11959	4.08	89.9	0.5	90.4	5.6	4	100	1538486	0.0077	16585	0.0001	2448857	0.0123	6265574	0.0315	8587811	0.043	633372	0.0031	7226303	0.0364	0.270476	26716988	0.134295	0.270476	198942706	172225718	0.865705	5.68807e+06	9.05388e+06	2.3165e+07	4122443	22065	2121066	42673	178	124	YES
Diptera	Calliphoridae	Cochliomyia	526	93	GCA_004302925.1	NA	long	pacbio	534026350	20	616429	5.79	95	3.7	98.7	1	0.3	100	12070775	0.0226	14959	0	5760842	0.0108	36739516	0.0688	23917214	0.0448	65935906	0.1234	102131067	0.1912	0.414207	246570279	0.461669	0.414207	534084880	287514601	0.538331	2.91419e+07	1.39081e+07	8.86985e+07	36510829	1652	227035	609075	213	121	YES
Hymenoptera	Apidae	Ceratina	191	345	GCA_004307685.1	NA	short	short	219302412	3	12363	4.09	90.5	5.6	96.1	1.4	2.5	100	277532	0.0013	1396	0	467134	0.0022	3010461	0.0138	2189802	0.01	28676	0.0001	8557528	0.0391	0.588853	14532529	0.0662671	0.588853	219302412	204769883	0.933733	471309	793294	5.11241e+06	2987654	313	22494	62524	142	108	YES
Hymenoptera	Formicidae	Cataglyphis	264	383	GCA_004329405.1	NA	short	short	295977620	4	15276	4.18	95.4	1	96.4	1.9	1.7	100	1989498	0.0068	23727	0.0001	3447899	0.0117	8074017	0.0273	13731907	0.0463	758876	0.0025	10215490	0.0345	0.267132	38241414	0.129204	0.267132	295977620	257736206	0.870796	7.44763e+06	1.29071e+07	3.02249e+07	5595145	13988	2464884	54519	197	122	YES
Diptera	Drosophilidae	Drosophila	423	72	GCA_004354385.1	NA	long	oxford	167978031	12	3071820	6.49	97.9	1.3	99.2	0.2	0.6	100	3123092	0.0186	14441	0.0001	3329561	0.0198	4643884	0.0276	9499939	0.0565	10383732	0.0618	13718608	0.0817	0.306813	44713257	0.266159	0.306813	167994222	123280965	0.733841	1.01791e+07	1.08521e+07	1.51359e+07	4619468	3959	20457	83058	180	112	YES
Lepidoptera	Pyralidae	Galleria	125	246	GCA_004355975.1	NA	long	pacbio	483233259	126	2885499	6.46	96.7	1.6	98.3	0.2	1.5	100	77319565	0.16	47752705	0.0988	6517610	0.0135	7778319	0.0161	11330214	0.0234	29463561	0.061	57428618	0.1189	0.241713	237590592	0.491659	0.241713	483242994	245652402	0.508341	3.19882e+08	2.69643e+07	3.218e+07	7750807	12855	14657	469958	141	114	YES
Diptera	Drosophilidae	Drosophila	395	26	GCA_004382145.1	NA	long	pacbio	152298302	4	22120385	7.34	99.2	0.7	99.9	0	0.1	100	12325566	0.081	4674	0	18907585	0.1242	1732765	0.0114	4768473	0.0313	4568155	0.03	1269517	0.0083	0.0291329	43576735	0.286092	0.0291329	152317181	108740446	0.713908	4.23081e+08	6.49011e+08	5.94779e+07	1704495	3116	25154	4659	281	80	YES
Diptera	Drosophilidae	Drosophila	389	24	GCA_004382185.1	NA	long	pacbio	146754366	7	22909593	7.36	97.3	2.6	99.9	0.1	0	100	10666937	0.0726	5524	0	15546077	0.1059	1732241	0.0118	4943864	0.0336	2148352	0.0146	1336049	0.0091	0.0367258	36379044	0.247858	0.0367258	146773509	110394465	0.752142	2.90448e+08	4.23301e+08	4.71669e+07	1709464	326	22451	5218	269	92	YES
Diptera	Drosophilidae	Drosophila	402	25	GCA_004382195.1	NA	long	pacbio	154170815	9	19907079	7.3	98.8	1	99.8	0	0.2	100	13260298	0.086	3739	0	18609987	0.1207	1806294	0.0117	4902698	0.0318	3191547	0.0208	2768686	0.018	0.0621573	44543249	0.288887	0.0621572	154189398	109646149	0.711113	2.13335e+08	2.99402e+08	2.90601e+07	1787629	109	18556	5091	552	85	YES
Hymenoptera	Formicidae	Atta	260	357	GCA_004480015.1	NA	short	short	286872587	0	6806	3.83	89.5	0.3	89.8	6.5	3.7	100	5606198	0.0196	1085	0	4980189	0.0174	31711179	0.1106	8421415	0.0294	5080261	0.0178	36387203	0.1269	0.394709	92187530	0.321354	NA_quality	286872587	194685057	0.678646	NA_quality	NA_quality	NA_quality	25272569	258204	6180406	246329	158	118	NO
Coleoptera	Scarabaeidae	Popillia	578	286	GCA_004785975.1	NA	short	short	531530429	0	13656	4.14	83.2	2.6	85.8	6.9	7.3	100	56948724	0.1071	272249	0.0005	10154002	0.0191	82434949	0.1551	4395271	0.0082	11439770	0.0216	71871619	0.1352	0.302596	237516584	0.446854	NA_quality	531530429	294013845	0.553146	NA_quality	NA_quality	NA_quality	80816069	927268	691612	377214	199	122	NO
Coleoptera	Silvanidae	Oryzaephilus	558	272	GCA_004796505.1	NA	short	short	104008747	14	19466	4.29	97.4	0.4	97.8	1.3	0.9	100	817396	0.0078	1599	0	1185790	0.0114	2058121	0.0197	2539555	0.0243	249156	0.0024	9355333	0.0899	0.577242	16206950	0.155823	0.577242	104008747	87801797	0.844177	1.41604e+06	2.05423e+06	3.56544e+06	1933984	55448	68689	43266	226	137	YES
Lepidoptera	Gelechiidae	Tuta	154	248	GCA_004799115.1	NA	short	short	906539853	181	20713	4.32	63.1	27.8	90.9	4.5	4.6	100	102193769	0.1127	70283846	0.0775	35771441	0.0394	25429054	0.028	5846640	0.0064	62333086	0.0687	155683969	0.1718	0.340262	457541805	0.504712	0.340262	906539853	448998048	0.495288	3.00339e+08	1.05129e+08	7.47338e+07	19313852	3503755	2611447	1104798	153	101	YES
Hymenoptera	Diprionidae	Neodiprion	242	458	GCA_004916985.1	NA	short	short	269775091	5	15816	4.2	97.5	0.4	97.9	0.9	1.2	100	1330136	0.0049	8720	0	2381425	0.0088	9755058	0.0362	5252301	0.0195	872670	0.0032	24859236	0.0922	0.559143	44459546	0.164802	0.559143	269775091	225315545	0.835198	2.37888e+06	4.25906e+06	1.74465e+07	6272156	70922	3411980	125714	206	155	YES
Lepidoptera	Nymphalidae	Danaus	86	197	GCA_004959915.1	NA	short	short	322399471	57	452245	5.66	92.9	0.9	93.8	1.1	5.1	100	21255387	0.0659	6849507	0.0212	3390313	0.0105	13557547	0.0421	5653190	0.0175	26370991	0.0818	32101198	0.0996	0.294026	109178133	0.338642	0.294026	322399471	213221338	0.661358	7.22909e+07	1.15307e+07	4.611e+07	13553155	604	3788	125050	272	145	YES
Diptera	Drosophilidae	Drosophila	467	34	GCA_005234255.1	NA	long	pacbio	224092364	6	718147	5.86	95	4	99	0.3	0.7	100	16600304	0.0741	806	0	37354817	0.1667	12234596	0.0546	4908549	0.0219	12786646	0.0569	7384016	0.0329	0.0809032	91269734	0.407286	0.0809032	224092364	132822630	0.592714	2.05187e+08	4.61722e+08	1.51225e+08	5142823	365	7091408	33309	241	132	YES
Hymenoptera	Formicidae	Nylanderia	291	386	GCA_005281655.1	NA	long	pacb_oxford	375107333	25	320712	5.51	95.8	2.2	98	1	1	100	21722184	0.0579	2909787	0.0078	35338173	0.0942	44486715	0.1186	10724878	0.0285	23047565	0.0613	39523114	0.1053	0.222349	177752416	0.473871	0.222349	375107333	197354917	0.526129	9.7694e+07	1.58931e+08	2.00076e+08	35191688	1507999	7787028	166572	258	144	YES
Lepidoptera	Psychidae	Eumeta	144	254	GCA_005406025.1	NA	long	oxford	727118372	106	324045	5.51	91.2	1.6	92.8	1.8	5.4	100	56673453	0.0779	11669782	0.016	9975761	0.0137	55335382	0.0762	8895178	0.0122	62608648	0.0861	117369185	0.1614	0.363905	322527389	0.443569	0.363905	727118372	404590983	0.556431	1.55737e+08	2.74131e+07	1.5206e+08	54844355	117494	373533	598404	211	149	YES
Lepidoptera	Tortricidae	Adoxophyes	123	250	GCA_005406045.1	NA	short	short	469620330	128	26229	4.42	94.2	0.9	95.1	2.4	2.5	100	54386327	0.1159	6403880	0.0136	3213329	0.0068	19620848	0.0418	3232460	0.0069	27668484	0.0589	95791572	0.204	0.455463	210316900	0.447845	0.455463	469620330	259303430	0.552155	1.19409e+08	7.05508e+06	4.30789e+07	18941482	655049	24317	735817	138	98	YES
Hemiptera	Aphididae	Acyrthosiphon	348	470	GCA_005508785.1	NA	short	short	541120603	43	25858	4.41	93.3	3.2	96.5	0.7	2.8	100	10726489	0.0198	19530	0	5899970	0.0109	66070419	0.1221	17144655	0.0317	4423121	0.0081	87876319	0.1624	0.457307	192160503	0.355116	0.457307	541120603	348960100	0.644884	2.34558e+07	1.29016e+07	1.44477e+08	64373352	4370	1692697	271466	195	132	YES
Diptera	Drosophilidae	Drosophila	463	48	GCA_005876895.1	NA	long	pacbio	219083522	25	17833963	7.25	97.3	1.5	98.8	0	1.2	100	17923570	0.0818	13064	0.0001	41872849	0.1911	8479356	0.0388	10559610	0.0482	9257056	0.0422	11918043	0.0544	0.119152	100023548	0.456554	0.119152	219083522	119059974	0.543446	1.50426e+08	3.51423e+08	7.1164e+07	6530816	27853	1920687	56368	228	98	YES
Diptera	Drosophilidae	Drosophila	433	28	GCA_005876975.1	NA	long	pacbio	182891478	5	5273554	6.72	92.8	5.6	98.4	0	1.6	100	6327041	0.0346	44573	0.0002	33070367	0.1809	8004105	0.0438	10430260	0.057	3746996	0.0206	6188488	0.0338	0.0912597	67811830	0.370776	0.0912597	182891478	115079648	0.629224	6.93301e+07	3.62376e+08	8.77069e+07	7921131	40	82934	13947	461	84	YES
Diptera	Drosophilidae	Drosophila	381	70	GCA_005889595.1	NA	short	short	131273702	0	3670	3.56	87.6	1.1	88.7	5.7	5.6	100	725539	0.0055	1014	0	806576	0.0062	834172	0.0064	7507223	0.0572	2961829	0.0226	4217266	0.0321	0.247294	17053619	0.129909	NA_quality	131273702	114220083	0.870091	NA_quality	NA_quality	NA_quality	783720	9568	40884	36498	131	90	NO
Diptera	Sarcophagidae	Sarcophaga	519	97	GCA_005959815.1	NA	short	short	476287247	15	19090	4.28	91.9	1.4	93.3	3.7	3	100	54718395	0.1149	6506841	0.0136	9603594	0.0202	26898874	0.0564	23182601	0.0487	489494	0.001	42756017	0.0897	0.26046	164155816	0.344657	0.26046	476287247	312131431	0.655343	2.10084e+08	3.68717e+07	1.03275e+08	26349289	1254	548331	321586	151	102	YES
Diptera	Asilidae	Dasypogon	522	111	GCA_006980735.1	NA	short	short	505154499	40	9253	3.97	91.6	2.4	94	2.1	3.9	100	53114654	0.1052	636070	0.0013	21324728	0.0422	37333317	0.0739	2844994	0.0057	8668711	0.0173	90869602	0.1799	0.423058	214792076	0.425201	0.423058	505154499	290362423	0.574799	1.25549e+08	5.04061e+07	8.82462e+07	36599643	22274	711400	569420	167	119	YES
Diptera	Culicidae	Anopheles	484	127	GCA_007018985.1	NA	short	short	288964812	22	20985	4.32	79.1	18.1	97.2	1.2	1.6	100	8735117	0.0302	2829573	0.0098	8802083	0.0305	16118475	0.0558	7938330	0.0275	522507	0.0017	15954227	0.0552	0.261973	60900312	0.210753	0.261973	288964812	228064500	0.789247	3.33436e+07	3.35992e+07	6.15273e+07	16039419	250	78806	78698	211	126	YES
Lepidoptera	Noctuidae	Busseola	128	219	GCA_007844875.1	NA	short	short	492902852	0	2742	3.44	69	0.4	69.4	18.5	12.1	100	90529868	0.1837	27402939	0.0556	4816066	0.0098	8147911	0.0165	3253474	0.0066	22208448	0.045	89995701	0.1826	0.36531	246354407	0.499803	NA_quality	492902852	246548445	0.500197	NA_quality	NA_quality	NA_quality	8037156	41593	69162	782755	120	98	NO
Diptera	Drosophilidae	Drosophila	421	56	GCA_007989325.2	NA	long	pacbio	169771745	6	5099607	6.71	98.3	1.2	99.5	0.1	0.4	100	6792806	0.04	3347	0	11712585	0.069	2074733	0.0123	9858329	0.058	8406647	0.0495	9039532	0.0532	0.188764	47887979	0.282073	0.188764	169771745	121883766	0.717927	3.59857e+07	6.20488e+07	1.09911e+07	1732732	145407	196594	33809	286	85	YES
Diptera	Drosophilidae	Drosophila	394	16	GCA_008042475.1	NA	short	short	152203088	3	348318	5.54	98	1.2	99.2	0.2	0.6	100	4636237	0.0305	19418	0.0001	4788276	0.0315	3374306	0.0222	5529798	0.0364	1306752	0.0085	3370230	0.0222	0.146373	23025017	0.151278	0.146373	152203088	129178071	0.848722	3.16742e+07	3.27129e+07	2.30529e+07	2105844	132	1268330	26517	136	92	YES
Diptera	Drosophilidae	Drosophila	415	8	GCA_008042485.1	NA	short	short	167807061	6	131064	5.12	98	1	99	0.3	0.7	100	7917535	0.0472	128220	0.0008	22850287	0.1362	4155570	0.0248	5632457	0.0336	3103329	0.0184	4426440	0.0264	0.0918085	48213838	0.287317	0.0918085	167807061	119593223	0.712683	8.62397e+07	2.48891e+08	4.52635e+07	3508573	921	646076	21078	225	125	YES
Diptera	Drosophilidae	Drosophila	422	9	GCA_008042515.1	NA	short	short	167897087	6	101914	5.01	98.2	1	99.2	0.3	0.5	100	7058638	0.042	2144	0	9946907	0.0593	5686249	0.0339	7134467	0.0424	6485621	0.0386	5988390	0.0356	0.141561	42302416	0.251954	0.141561	167897087	125594671	0.748046	4.98627e+07	7.02657e+07	4.01681e+07	4934484	11977	739788	31433	203	122	YES
Diptera	Drosophilidae	Drosophila	432	20	GCA_008042535.1	NA	short	short	180972673	14	55635	4.75	94.6	4.2	98.8	0.4	0.8	100	5247552	0.029	7513	0	6313177	0.0349	6562156	0.0363	6319331	0.0349	5787446	0.0319	9943026	0.055	0.247461	40180201	0.222024	0.247461	180972673	140792472	0.777976	2.12056e+07	2.55118e+07	2.6518e+07	6040641	3378	518137	62334	168	112	YES
Diptera	Drosophilidae	Drosophila	441	4	GCA_008042555.1	NA	short	short	187578810	11	70792	4.85	97.2	2	99.2	0.4	0.4	100	10956979	0.0584	27758	0.0001	8978830	0.0478	5386615	0.0287	6935935	0.037	4911310	0.0262	4017984	0.0214	0.0974874	41215411	0.219723	0.0974874	187578810	146363399	0.780277	1.12394e+08	9.21024e+07	5.52545e+07	5111067	295	275253	24080	175	113	YES
Diptera	Drosophilidae	Drosophila	448	12	GCA_008042575.1	NA	short	short	196825890	6	32759	4.52	91.6	7.2	98.8	0.4	0.8	100	7299016	0.0371	12467	0.0001	13418894	0.0682	5794119	0.0295	7497977	0.0381	5507663	0.0279	5290843	0.0269	0.118044	44820979	0.227719	0.118044	196825890	152004911	0.772281	6.18331e+07	1.13677e+08	4.90844e+07	4622974	187	1170958	31054	178	109	YES
Diptera	Drosophilidae	Drosophila	452	21	GCA_008042615.1	NA	short	short	197420731	11	47547	4.68	97.3	1.5	98.8	0.4	0.8	100	9652854	0.0488	2043	0	13771858	0.0697	7609814	0.0385	6014507	0.0303	11692688	0.0593	12789620	0.0648	0.207848	61533384	0.311687	0.207848	197420731	135887347	0.688313	4.64418e+07	6.62591e+07	3.66123e+07	6683674	5523	920617	72217	186	125	YES
Diptera	Drosophilidae	Drosophila	447	2	GCA_008042635.1	NA	short	short	190505469	13	28823	4.46	96.2	2.6	98.8	0.4	0.8	100	10674898	0.0561	2931	0	10139241	0.0532	5784517	0.0303	6088645	0.032	7282199	0.0382	4805792	0.0252	0.107324	44778223	0.23505	0.107324	190505469	145727246	0.76495	9.94639e+07	9.44729e+07	5.38975e+07	4858011	351	926155	29431	176	114	YES
Diptera	Drosophilidae	Drosophila	425	1	GCA_008042655.1	NA	short	short	175666184	4	31415	4.5	95.1	3.9	99	0.4	0.6	100	10113435	0.0576	27535	0.0002	10486310	0.0597	5870038	0.0334	6128520	0.0349	2896445	0.0165	5441448	0.0309	0.132836	40963731	0.233191	0.132836	175666184	134702453	0.766809	7.61349e+07	7.89419e+07	4.41902e+07	5242437	237	627364	26986	210	126	YES
Diptera	Drosophilidae	Drosophila	428	5	GCA_008042675.1	NA	short	short	178856532	6	83310	4.92	97.3	1.7	99	0.1	0.9	100	15548654	0.0869	75199	0.0004	13937853	0.0779	5438126	0.0304	6422113	0.0359	4436501	0.0247	4246867	0.0238	0.0847588	50105313	0.280142	0.0847588	178856532	128751219	0.719858	1.83446e+08	1.64441e+08	6.416e+07	4058498	130	1379498	21730	204	132	YES
Diptera	Drosophilidae	Drosophila	410	6	GCA_008042695.1	NA	short	short	163991206	7	84243	4.93	97.7	1.7	99.4	0.1	0.5	100	7147083	0.0435	3274	0	8810829	0.0537	3585045	0.0219	6042777	0.0368	4007762	0.0245	3621495	0.0221	0.109021	33218265	0.202561	0.109021	163991206	130772941	0.797439	6.55568e+07	8.08176e+07	3.28839e+07	3054959	83	530003	21969	181	106	YES
Diptera	Drosophilidae	Drosophila	393	13	GCA_008042715.1	NA	short	short	151202254	7	73461	4.87	98.3	1	99.3	0.2	0.5	100	5431361	0.0359	121267	0.0008	7568988	0.0501	5321279	0.0352	5881998	0.0388	4197811	0.0278	3782061	0.0251	0.117074	32304765	0.213653	0.117074	151202254	118897489	0.786347	4.63924e+07	6.46511e+07	4.54521e+07	4954879	348	366052	21593	186	113	YES
Diptera	Drosophilidae	Drosophila	414	14	GCA_008042735.1	NA	short	short	164601511	9	24887	4.4	94.6	4.1	98.7	0.2	1.1	100	5853833	0.0356	41592	0.0002	7841058	0.0476	5798379	0.0353	6169831	0.0375	5009688	0.0304	4528518	0.0275	0.128494	35242899	0.21411	0.128494	164601511	129358612	0.78589	4.55571e+07	6.10225e+07	4.51255e+07	5483252	146	314981	24952	190	114	YES
Diptera	Drosophilidae	Drosophila	400	7	GCA_008042755.1	NA	short	short	156593892	7	209731	5.32	98.1	1.2	99.3	0.1	0.6	100	6855653	0.0438	1530	0	9949579	0.0635	3238151	0.0207	6134985	0.0392	2993276	0.0191	3715060	0.0237	0.11296	32888234	0.210022	0.11296	156593892	123705658	0.789978	6.06909e+07	8.80804e+07	2.86663e+07	2917293	563	320295	19772	207	130	YES
Diptera	Drosophilidae	Drosophila	388	23	GCA_008042775.1	NA	short	short	149209000	5	93696	4.97	98.5	1	99.5	0.1	0.4	100	2293159	0.0154	3298	0	3864700	0.0259	1344399	0.009	6222494	0.0417	5306796	0.0356	3538385	0.0237	0.156751	22573231	0.151286	0.156751	149209000	126635769	0.848714	1.46293e+07	2.4655e+07	8.57663e+06	1053400	283	290716	28155	138	101	YES
Diptera	Drosophilidae	Drosophila	446	17	GCA_008042795.1	NA	short	short	189050820	9	77794	4.89	97.4	1.5	98.9	0.4	0.7	100	8249158	0.0437	34289	0.0002	11071762	0.0586	7800692	0.0413	5762711	0.0304	7594024	0.0403	12589812	0.0666	0.237085	53102448	0.28089	0.237085	189050820	135948372	0.71911	3.4794e+07	4.66995e+07	3.29025e+07	7004572	4370	791750	75376	176	116	YES
Diptera	Drosophilidae	Drosophila	392	11	GCA_008042815.1	NA	short	short	151823105	3	106114	5.03	98	1.2	99.2	0	0.8	100	3096325	0.0204	3295	0	5893249	0.0388	2245264	0.0148	6319863	0.0417	8962414	0.059	1954296	0.0128	0.0686327	28474706	0.187552	0.0686327	151823105	123348399	0.812448	4.51144e+07	8.58665e+07	3.27142e+07	1445817	227	799220	13065	165	101	YES
Diptera	Drosophilidae	Drosophila	440	3	GCA_008044335.1	NA	short	short	187248584	11	36923	4.57	96	3	99	0.4	0.6	100	11725299	0.0626	35172	0.0002	9365297	0.05	4413309	0.0236	6437485	0.0344	3760556	0.0201	4282073	0.0229	0.107	40019191	0.213722	0.107	187248584	147229393	0.786278	1.09582e+08	8.75257e+07	4.12457e+07	3769716	11248	632345	24760	180	110	YES
Diptera	Drosophilidae	Drosophila	431	18	GCA_008044355.1	NA	short	short	182681050	9	66522	4.82	97	1.6	98.6	0.7	0.7	100	7636117	0.0418	12241	0.0001	10961195	0.06	7872969	0.0431	5926986	0.0325	6256444	0.0343	12075786	0.0661	0.237985	50741738	0.277761	0.237985	182681050	131939312	0.722239	3.20865e+07	4.60583e+07	3.30817e+07	6948142	10418	914409	72335	176	114	YES
Diptera	Drosophilidae	Drosophila	439	19	GCA_008044435.1	NA	short	short	186167886	7	57257	4.76	97.5	1.4	98.9	0.6	0.5	100	8570611	0.046	66234	0.0004	12383455	0.0665	8450260	0.0454	5833829	0.0312	9242933	0.0496	12779129	0.0686	0.222919	57326451	0.307929	0.222919	186167886	128841435	0.692071	3.84473e+07	5.55515e+07	3.79074e+07	7405927	3412	1040921	70951	189	124	YES
Hemiptera	Aphididae	Sitobion	342	471	GCA_008086715.1	NA	long	pacbio	397852643	22	1613763	6.21	88.9	3.7	92.6	0.8	6.6	100	6949456	0.0175	27273	0.0001	5054328	0.0127	48554937	0.1221	13801283	0.0347	4695207	0.0118	56007221	0.1408	0.414593	135089705	0.339547	0.414593	397852643	262762938	0.660453	1.67621e+07	1.21911e+07	1.17115e+08	45880447	1005	2673485	144269	227	131	YES
Diptera	Drosophilidae	Drosophila	445	47	GCA_008121215.1	NA	long	pacbio	192660667	24	15319690	7.19	97.8	1.2	99	0	1	100	16955703	0.088	6861	0	24124485	0.1252	7653672	0.0397	9830526	0.051	5161082	0.0268	10909521	0.0566	0.146158	74641850	0.387427	0.146158	192660667	118018817	0.612573	1.16009e+08	1.65057e+08	5.23657e+07	7356287	347	297038	53001	218	100	YES
Diptera	Drosophilidae	Drosophila	438	46	GCA_008121275.1	NA	long	oxford	184313494	15	5037799	6.7	95.8	1.7	97.5	0.1	2.4	100	12550905	0.0681	972	0	26675436	0.1447	5949888	0.0323	8154449	0.0442	4872656	0.0265	8846724	0.048	0.13194	67051030	0.363788	0.13194	184313494	117262464	0.636212	9.51257e+07	2.02178e+08	4.50954e+07	5316391	215	633282	49067	195	105	YES
Hemiptera	Aphididae	Aulacorthum	332	468	GCA_008528875.1	NA	short	short	316098029	0	5312	3.73	82.3	1.4	83.7	8.6	7.7	100	3185709	0.0101	2518	0	784667	0.0025	21055301	0.0666	12093204	0.0383	1164668	0.0037	21590111	0.0683	0.360579	59876178	0.189423	NA_quality	316098029	256221851	0.810577	NA_quality	NA_quality	NA_quality	20844702	403	210196	73927	167	118	NO
Coleoptera	Lampyridae	Photinus	575	296	GCA_008802855.1	SRR6345451	long	pacbio	471511253	99	170308	5.23	90	8.9	98.9	0.4	0.7	100	21606719	0.0459	257971	0.0005	15208448	0.0322	46664425	0.099	4324590	0.0092	5033633	0.0106	140731215	0.2985	0.60186	233827001	0.49591	0.60186	471511253	237684252	0.50409	3.58999e+07	2.52691e+07	7.75336e+07	40134192	3508651	3021582	728915	206	133	YES
Diptera	Culicidae	Anopheles	473	126	GCA_008817895.1	NA	short	short	232626592	20	18769	4.27	97.3	0.7	98	1	1	100	5676880	0.0244	1915540	0.0082	4088990	0.0175	9925750	0.0427	7003168	0.0301	279564	0.0012	10677740	0.0459	0.26986	39567632	0.170086	0.26986	232632941	193065309	0.829914	2.10364e+07	1.51522e+07	3.6781e+07	9868003	14645	43102	74344	150	96	YES
Lepidoptera	Crambidae	Ostrinia	121	240	GCA_008921685.1	NA	short	short	454916002	121	10587	4.02	91.1	1.1	92.2	3.5	4.3	100	21815404	0.048	3573393	0.0078	1974009	0.0043	7104614	0.0156	2692664	0.0059	15548724	0.0342	51279621	0.1127	0.493128	103988429	0.228588	0.493128	454916002	350927573	0.771412	4.42388e+07	4.00303e+06	1.44072e+07	6950319	28632	125663	421792	127	104	YES
Lepidoptera	Nymphalidae	Hypolimnas	110	188	GCA_008963455.1	NA	short	short	408793762	34	135179	5.13	97.8	0.1	97.9	0.8	1.3	100	23864062	0.0584	14184918	0.0347	1809804	0.0044	16477374	0.0403	5368901	0.0131	54461113	0.1331	54869657	0.1342	0.320808	171035829	0.418391	0.320808	408793762	237757933	0.581609	7.43874e+07	5.64139e+06	5.13621e+07	16473505	558	3311	444395	140	113	YES
Trichoptera	Stenopsychidae	Stenopsyche	3	256	GCA_008973525.1	NA	long	pacbio	451494475	85	1296863	6.11	94.3	2.4	96.7	1.2	2.1	100	21400485	0.0474	3264	0	649468	0.0014	81906777	0.1814	2851132	0.0063	8214822	0.0182	56148494	0.1244	0.328019	171174442	0.379129	0.328019	451494475	280320033	0.620871	6.52416e+07	1.97997e+06	2.49701e+08	81902533	493	3751	453557	137	97	YES
Diptera	Cecidomyiidae	Sitodiplosis	459	116	GCA_009176505.1	NA	short	short	208784321	9	62752	4.8	96.5	2	98.5	0.4	1.1	100	4369527	0.0209	57568	0.0003	2094173	0.0101	3667002	0.0176	5526991	0.0265	317737	0.0015	20359419	0.0975	0.559441	36392417	0.174293	0.559441	208800104	172407687	0.825707	7.81052e+06	3.74333e+06	6.55476e+06	3426349	219	240434	92955	234	156	YES
Diptera	Cecidomyiidae	Contarinia	442	115	GCA_009176525.2	NA	short	short	185885008	22	95005	4.98	97.5	1.2	98.7	0.4	0.9	100	2283054	0.0123	70490	0.0004	1160227	0.0062	3642158	0.0196	3761012	0.0201	130316	0.0008	14371184	0.0773	0.565384	25418441	0.136733	0.565384	185898253	160479812	0.863267	4.03806e+06	2.0521e+06	6.44192e+06	3460989	338	180831	66821	225	147	YES
Hymenoptera	Pteromalidae	Nasonia	263	414	GCA_009193385.2	NA	long	pacb_oxford	297309692	8	7180486	6.86	97.4	0.7	98.1	0.5	1.4	100	17987542	0.0605	376610	0.0013	22068422	0.0742	24307421	0.0818	25596714	0.0861	11923593	0.0401	24493393	0.0824	0.193236	126753695	0.426336	0.193236	297309692	170555997	0.573664	9.30858e+07	1.14204e+08	1.25791e+08	15913899	456923	7936599	103299	249	142	YES
Hymenoptera	Ichneumonidae	Diadromus	174	NA_quality	GCA_009394715.1	NA	short	short	188922525	8.28	695	2.84	32.6	0.1	32.7	45	22.3	100	1138405	0.0061	27866	0.0001	2221232	0.0117	2082025	0.011	3663431	0.0193	273801	0.0014	17046337	0.0902	NA_quality	26453097	0.140021	NA_quality	188922525	162469428	0.859979	NA_quality	NA_quality	NA_quality	1859683	166658	55684	212173	84	67	NA_quality
Trichoptera	Polycentropodidae	Plectrocnemia	2	257	GCA_009617715.1	NA	long	oxford	396695105	60	868980	5.94	96.6	1	97.6	1	1.4	100	22215857	0.056	1802312	0.0045	2303736	0.0058	38282871	0.0966	7673620	0.0193	2481827	0.0062	75026271	0.1892	0.500888	149786494	0.377586	0.500888	396695105	246908611	0.622414	4.43529e+07	4.5993e+06	7.643e+07	38228959	434	53478	465618	176	115	YES
Trichoptera	Hydropsychidae	Hydropsyche	1	258	GCA_009617725.1	NA	long	oxford	229663394	24	2190134	6.34	96.3	0.5	96.8	1.4	1.8	100	2209640	0.0096	1934	0	328054	0.0015	14370537	0.0626	4086091	0.0177	258283	0.0011	23201784	0.1011	0.521901	44456323	0.193572	0.521901	229663394	185207071	0.806428	4.23383e+06	628576	2.7535e+07	14350132	203	20202	137066	182	121	YES
Diptera	Drosophilidae	Drosophila	413	71	GCA_009650485.1	NA	long	pacbio	165830429	9	33427555	7.52	96.7	1.1	97.8	0.1	2.1	100	4615879	0.0279	2949	0	5254197	0.0316	3663507	0.0221	10641042	0.0641	8074704	0.0487	5712557	0.0345	0.15047	37964835	0.228916	0.15047	165846051	127881216	0.771084	3.06765e+07	3.49186e+07	2.43471e+07	3087622	205	575680	35461	171	90	YES
Diptera	Drosophilidae	Drosophila	444	51	GCA_009664405.1	NA	long	oxford	192749618	19	2386451	6.38	93.9	0.7	94.6	0.5	4.9	100	15373869	0.0797	1776	0	26541995	0.1377	5345618	0.0277	8792509	0.0457	13740899	0.0713	7107156	0.0368	0.0924162	76903822	0.398983	0.0924162	192749618	115845796	0.601017	1.66355e+08	2.87201e+08	5.78429e+07	4754899	303	590416	41128	185	95	YES
Lepidoptera	Nymphalidae	Maniola	137	194	GCA_009667785.1	NA	long	pacb_oxford	614735551	0	44054	4.64	69.6	17.1	86.7	3.8	9.5	100	48383412	0.0788	18029467	0.0293	8559109	0.0139	15051735	0.0245	6822806	0.0111	77822136	0.1265	77633022	0.1263	0.307699	252301687	0.410423	NA_quality	614735551	362433864	0.589577	NA_quality	NA_quality	NA_quality	13727418	131174	1193143	646648	130	95	NO
Lepidoptera	Nymphalidae	Danaus	61	195	GCA_009731565.1	NA	short	short	248676414	29	108026	5.03	96.2	1.6	97.8	1.2	1	100	10012488	0.0403	1149591	0.0046	819186	0.0033	3563731	0.0144	4846007	0.0195	7404203	0.0298	6687703	0.0269	0.193943	34482909	0.138666	0.193943	248676414	214193505	0.861334	5.16261e+07	4.22386e+06	1.83752e+07	3555218	530	7983	50163	144	114	YES
Hemiptera	Miridae	Apolygus	357	489	GCA_009739505.2	NA	long	pacbio	1023618409	333	783891	5.89	93.1	2.3	95.4	1.8	2.8	100	62321115	0.0609	1926298	0.0019	66754618	0.0652	77228330	0.0755	7577753	0.0074	8632799	0.0084	414329058	0.4048	0.648636	638769971	0.624031	0.648636	1023618409	384848438	0.375969	9.60803e+07	1.02915e+08	1.19063e+08	73268816	194	3959320	1875302	242	142	YES
Hemiptera	Pseudococcidae	Phenacoccus	326	481	GCA_009761765.1	SRR11946880	long	pacbio	292537731	46	489811	5.69	90.9	4	94.9	1.3	3.8	100	6300079	0.0215	1745	0	5442588	0.0186	10438347	0.0357	3769171	0.0129	1653044	0.0056	89053223	0.3044	0.763369	116658197	0.39878	0.763369	292537731	175879534	0.60122	8.253e+06	7.1297e+06	1.36741e+07	9440807	280684	716856	384692	248	161	YES
Hymenoptera	Apidae	Apis	197	340	GCA_009792835.1	NA	long	oxford	223527749	1	30868	4.49	98.5	0.1	98.6	0.5	0.9	100	234600	0.001	1978	0	622999	0.0028	1202098	0.0054	14753382	0.066	68946	0.0003	5591113	0.025	0.248769	22475116	0.100547	0.248769	223527749	201052633	0.899453	943043	2.50433e+06	4.83218e+06	1194158	423	7517	32064	183	138	YES
Hymenoptera	Figitidae	Ganaspis	310	446	GCA_009823575.1	NA	short	short	821362844	0	4255	3.63	68.4	0.7	69.1	22.8	8.1	100	24892701	0.0303	258937	0.0003	21224712	0.0259	58751137	0.0715	17899130	0.0217	9593855	0.0117	414820207	0.5051	0.757745	547440679	0.666503	NA_quality	821362844	273922165	0.333497	NA_quality	NA_quality	NA_quality	54049937	122590	4578610	2224437	204	133	NO
Diptera	Stratiomyidae	Hermetia	532	114	GCA_009835165.1	NA	short	short	1101327485	274	258950	5.41	91.5	7.6	99.1	0.4	0.5	100	518336152	0.4707	5006622	0.0045	46195385	0.0419	45078314	0.041	2814326	0.0025	20861222	0.0189	105926056	0.0962	0.142332	744218077	0.675746	0.142332	1101327485	357109408	0.324254	3.64174e+09	3.24561e+08	3.16712e+08	44433016	1495	643803	557085	212	133	YES
Hemiptera	Aphididae	Aphis	331	463	GCA_009835225.1	NA	short	short	318873360	7	32785	4.52	92.2	2.7	94.9	1.7	3.4	100	3038396	0.0095	37725	0.0001	1624027	0.0051	19915319	0.0625	16317558	0.0512	1081944	0.0034	25548445	0.0801	0.37814	67563414	0.211882	0.37814	318873360	251309946	0.788118	8.0351e+06	4.29477e+06	5.26665e+07	19198783	2870	713666	57758	184	123	YES
Coleoptera	Elateridae	Alaus	562	NA_quality	GCA_009852465.1	NA	short	short	188381324	8.28	2461	3.39	6.9	2.3	9.2	4.8	86	100	2220249	0.0117	282529	0.0015	2548922	0.0136	1050336	0.0055	2311927	0.0123	377378	0.002	18403612	0.0977	NA_quality	27194953	0.144361	NA_quality	188381324	161186371	0.855639	NA_quality	NA_quality	NA_quality	1026981	270	23085	90922	207	120	NA_quality
Hymenoptera	Formicidae	Formica	259	381	GCA_009859135.1	NA	long	pacbio	290452129	16	5698920	6.76	97.5	1.6	99.1	0.3	0.6	100	6256823	0.0216	128266	0.0004	20026943	0.0689	36102869	0.1243	9067278	0.0313	4886250	0.0168	28053766	0.0965	0.2684	104522195	0.35984	0.2684	290468881	185946686	0.64016	2.33116e+07	7.4616e+07	1.34511e+08	23573474	228044	12301351	96951	305	151	YES
Lepidoptera	Adelidae	Adela	153	NA_quality	GCA_009867175.1	NA	short	short	874161216	8.94	12648	4.1	45.6	0.6	46.2	33.3	20.5	100	173668178	0.1987	615922	0.0007	4038752	0.0046	29750168	0.034	44009167	0.0504	17465228	0.0199	252940625	0.2893	NA_quality	522488040	0.597702	NA_quality	874161216	351673176	0.402298	NA_quality	NA_quality	NA_quality	29276231	14401	459536	2347898	116	91	NA_quality
Coleoptera	Staphylinidae	Adranes	589	293	GCA_009867245.1	NA	short	short	887888497	0	27425	4.44	75	0.4	75.4	15.4	9.2	100	148322532	0.167	658024	0.0007	16438552	0.0185	111742104	0.1258	10910601	0.0123	24920582	0.028	254241768	0.2863	0.448213	567234163	0.638857	NA_quality	887888497	320654334	0.361143	NA_quality	NA_quality	NA_quality	103018896	145722	8577486	1612668	176	126	NO
Collembola	Neelidae	Neelides	541	543	GCA_009869795.1	NA	short	short	97765094	0	80984	4.91	85.1	0.9	86	3.3	10.7	100	31137	0.0003	842	0	40556	0.0004	460082	0.0047	2198949	0.0224	11425	0.0001	1424043	0.0146	0.34174	4167034	0.0426229	NA_quality	97765094	93598060	0.957377	NA_quality	NA_quality	NA_quality	441777	175	18130	11048	136	107	NO
Collembola	Oncopoduridae	Oncopodura	542	535	GCA_009869805.1	NA	short	short	118350332	0	13246	4.12	82.6	1.5	84.1	5.4	10.5	100	111136	0.001	137471	0.0012	139888	0.0012	181285	0.0016	2966171	0.025	55237	0.0005	4028970	0.034	0.528725	7620158	0.0643865	NA_quality	118350332	110730174	0.935614	NA_quality	NA_quality	NA_quality	162545	276	18464	21628	193	140	NO
Collembola	Neanuridae	Pseudachorutes	539	544	GCA_009869845.1	NA	short	short	77080803	0	35249	4.55	87.6	1.5	89.1	1.8	9.1	100	145978	0.0019	17625	0.0002	249180	0.0032	101043	0.0014	578401	0.0075	49407	0.0006	835303	0.0108	0.422524	1976937	0.0256476	NA_quality	77080803	75103866	0.974352	NA_quality	NA_quality	NA_quality	85809	8381	6853	4748	178	113	NO
Collembola	Tomoceridae	Tomocerus	550	534	GCA_009869885.1	NA	short	short	264859944	0	11437	4.06	75.5	1.2	76.7	7.2	16.1	100	1298424	0.0049	563	0	1417040	0.0054	1827682	0.0069	2993168	0.0113	1029510	0.0039	27184011	0.1027	0.760383	35750398	0.134979	NA_quality	264859944	229109546	0.865021	NA_quality	NA_quality	NA_quality	1756853	19360	51469	184895	155	112	NO
Collembola	Hypogastruridae	Ceratophysella	545	546	GCA_009869905.1	NA	short	short	162375375	0	7151	3.85	76.9	1.8	78.7	8.1	13.2	100	683303	0.0042	1134	0	775222	0.0048	802457	0.005	1070690	0.0065	262830	0.0016	8368427	0.0515	0.699464	11964063	0.0736815	NA_quality	162375375	150411312	0.926318	NA_quality	NA_quality	NA_quality	715310	468	86679	56761	155	111	NO
Collembola	Onychiuridae	Thalassaphorura	544	548	GCA_009869925.1	NA	short	short	130904934	0	11137	4.05	75.6	1.5	77.1	6.4	16.5	100	625349	0.0047	4899	0	335877	0.0025	299368	0.0023	1527312	0.0116	239502	0.0018	3506962	0.0268	0.536293	6539269	0.0499543	NA_quality	130904934	124365665	0.950046	NA_quality	NA_quality	NA_quality	248435	630	50303	19497	187	120	NO
Collembola	Tullbergiidae	Mesaphorura	540	547	GCA_009869945.1	NA	short	short	97983859	1	163682	5.21	87.6	2.3	89.9	1.5	8.6	100	113240	0.0012	255	0	150351	0.0015	231260	0.0023	751852	0.0076	108448	0.0011	807977	0.0082	0.373478	2163383	0.022079	0.373478	97983859	95820476	0.977921	303204	402569	619206	226831	291	4138	4116	197	119	YES
Diptera	Drosophilidae	Drosophila	409	42	GCA_009870125.2	NA	long	pacbio	163266851	10	30706867	7.49	98.1	1.4	99.5	0.1	0.4	100	9807963	0.06	3377	0	16771321	0.1027	2592510	0.0159	7950720	0.0487	4501227	0.0276	6637869	0.0406	0.13753	48264987	0.295591	0.13753	163282969	115017982	0.704409	7.13152e+07	1.21947e+08	1.88505e+07	2313762	256	278492	25644	270	98	YES
Collembola	Bourletiellidae	Pseudobourletiella	546	539	GCA_009870155.1	NA	short	short	208313765	0	9981	4	83.4	1.2	84.6	4.9	10.5	100	822030	0.004	714	0	751371	0.0036	2903871	0.0139	6206349	0.0298	240768	0.0011	21424627	0.1028	0.662281	32349730	0.155293	NA_quality	208313765	175964035	0.844707	NA_quality	NA_quality	NA_quality	2318033	476	585362	129912	175	129	NO
Collembola	Arrhopalitidae	Pygmarrhopalites	547	542	GCA_009870185.1	NA	short	short	211516385	0	19872	4.3	77	1.5	78.5	7.8	13.7	100	233009	0.0011	619	0	475959	0.0023	1584458	0.0075	6065968	0.0286	43758	0.0002	10221574	0.0484	0.548799	18625345	0.0880563	NA_quality	211516385	192891040	0.911944	NA_quality	NA_quality	NA_quality	1571584	629	12245	72012	146	105	NO
Collembola	Sminthuridae	Lipothrix	549	540	GCA_009872335.1	NA	short	short	244673950	0	10263	4.01	79.7	1.5	81.2	6.3	12.5	100	1597840	0.0065	2668	0	606705	0.0024	1098985	0.0044	5344748	0.0219	666497	0.0027	21448233	0.0877	0.697148	30765676	0.125742	NA_quality	244673950	213908274	0.874258	NA_quality	NA_quality	NA_quality	1042509	681	55795	132260	171	116	NO
Collembola	Sminthurididae	Sminthurides	543	541	GCA_009872375.1	NA	short	short	130022519	0	10741	4.03	78.2	1	79.2	7.4	13.4	100	175031	0.0014	1110	0	390225	0.003	281808	0.0022	489489	0.0038	31247	0.0002	663562	0.0051	0.32648	2032472	0.0156317	NA_quality	130022519	127990047	0.984368	NA_quality	NA_quality	NA_quality	124242	208	157358	3541	188	118	NO
Hemiptera	Aphididae	Aphis	329	461	GCA_009928515.1	NA	long	pacbio	303155567	4	1999963	6.3	92	3.4	95.4	0.8	3.8	100	2442939	0.008	2344	0	1889636	0.0063	19157851	0.0632	15150069	0.05	1322057	0.0043	18930535	0.0624	0.321426	58895431	0.194275	0.321426	303155567	244260136	0.805725	7.60031e+06	5.87891e+06	5.96026e+07	17620915	330	1536606	38483	207	119	YES
Collembola	Tomoceridae	Tomocerus	552	533	GCA_009936455.1	NA	short	short	332593957	0	18216	4.26	79.2	1.8	81	6.7	12.3	100	2483912	0.0075	63360	0.0002	2943868	0.0089	2801689	0.0084	4736212	0.0143	1021190	0.0032	46557976	0.14	0.768179	60608207	0.182229	NA_quality	332593957	271985750	0.817771	NA_quality	NA_quality	NA_quality	2071824	12799	717066	327022	151	103	NO
Lepidoptera	Nymphalidae	Taenaris	119	NA_quality	GCA_009936525.1	NA	short	short	456368171	8.66	54861	4.74	31	0.8	31.8	26.3	41.9	100	45942044	0.1007	19949099	0.0437	6679997	0.0146	8941358	0.0196	14124164	0.0308	9492696	0.0208	54051249	0.1184	NA_quality	159180607	0.348799	NA_quality	456368171	297187564	0.651201	NA_quality	NA_quality	NA_quality	8852546	992	87820	548204	107	82	NA_quality
Lepidoptera	Sphingidae	Hyles	140	231	GCA_009982885.1	NA	long	pacbio	651398004	271	7475438	6.87	94.4	3.7	98.1	0.8	1.1	100	96442941	0.148	53440067	0.082	20235535	0.0311	34681833	0.0532	4783973	0.0074	51428008	0.079	89737568	0.1378	0.255845	350749925	0.538445	0.255845	651413307	300663382	0.461555	3.76959e+08	7.9093e+07	1.35558e+08	34495652	33476	152705	400936	239	138	YES
Lepidoptera	Pieridae	Colias	84	202	GCA_009982905.1	NA	long	pacbio	318584009	69	11686	4.07	90.3	2.2	92.5	3.1	4.4	100	6852763	0.0216	1889870	0.0059	913449	0.0029	5171346	0.0162	4247177	0.0134	23936280	0.0752	19767626	0.0621	0.314879	62778511	0.197055	0.314879	318584009	255805498	0.802945	2.17632e+07	2.90095e+06	1.64233e+07	5158151	346	12849	136228	150	112	YES
Lepidoptera	Saturniidae	Actias	143	255	GCA_010014465.1	NA	short	short	684275567	78	112291	5.05	81.9	8.2	90.1	2.9	7	100	68744019	0.1005	8450850	0.0123	2289016	0.0034	13701016	0.02	9435813	0.0138	54095601	0.079	64254056	0.0939	0.290781	220970371	0.322926	0.290781	684275567	463305196	0.677074	2.36411e+08	7.87195e+06	4.71179e+07	13590697	96844	13475	549851	125	95	YES
Hemiptera	Pentatomidae	Stiretrus	354	495	GCA_010014745.1	NA	short	short	866582305	0	36287	4.56	66.7	0.4	67.1	17.6	15.3	100	96979162	0.1119	65935649	0.0761	9808149	0.0113	37485514	0.0433	23106344	0.0266	64352324	0.0743	109893766	0.1268	0.269638	407560908	0.470308	NA_quality	866582305	459021397	0.529692	NA_quality	NA_quality	NA_quality	36912713	2170	570631	844766	140	113	NO
Coleoptera	Staphylinidae	Aenictocupidus	561	291	GCA_010014765.1	NA	short	short	178224308	0	5917	3.77	87.2	0.4	87.6	6.7	5.7	100	13147270	0.0738	776154	0.0043	1329514	0.0075	4656467	0.0261	2535557	0.0142	1011183	0.0056	26137204	0.1467	0.52703	49593349	0.278264	NA_quality	178224308	128630959	0.721736	NA_quality	NA_quality	NA_quality	3370635	947	1284885	184337	156	122	NO
Dermaptera	Anisolabididae	Anisolabis	538	526	GCA_010014785.1	NA	short	short	641675028	0	48444	4.69	81.6	1.9	83.5	10.7	5.8	100	11985963	0.0186	114405	0.0002	1097837	0.0017	51054069	0.0796	23406830	0.0365	4462558	0.007	121622054	0.1895	0.569009	213743716	0.333103	NA_quality	641675028	427931312	0.666897	NA_quality	NA_quality	NA_quality	50995616	1870	56583	1071521	127	103	NO
Lepidoptera	Nymphalidae	Danaus	92	196	GCA_010014825.1	NA	short	short	354197052	0	14547	4.16	86.2	0.7	86.9	7.9	5.2	100	25844277	0.0729	6381851	0.018	3394077	0.0095	8345712	0.0236	6495997	0.0183	15844212	0.0448	16584986	0.0468	0.200082	82891112	0.234025	NA_quality	354197052	271305940	0.765975	NA_quality	NA_quality	NA_quality	8320101	16371	9240	99674	172	128	NO
Hymenoptera	Cynipidae	Andricus	312	440	GCA_010014905.1	NA	short	short	1336778427	0	44534	4.65	73.7	0.5	74.2	16.8	9	100	96241791	0.0719	3021993	0.0023	35451163	0.0265	114582433	0.0857	15480013	0.0116	17345598	0.013	630078945	0.4714	0.690723	912201936	0.682388	NA_quality	1336778427	424576491	0.317612	NA_quality	NA_quality	NA_quality	109513590	406610	4662233	3020311	231	139	NO
Lepidoptera	Pieridae	Delias	79	205	GCA_010014985.1	NA	short	short	297182150	52	103537	5.02	92.2	4.2	96.4	1.5	2.1	100	18467421	0.0621	22123507	0.0744	1289074	0.0043	5790930	0.0195	4008233	0.0135	5047153	0.017	10806358	0.0363	0.160017	67532676	0.227243	0.160017	297182150	229649474	0.772757	1.15409e+08	8.05587e+06	3.61895e+07	5786470	298	4162	97488	121	95	YES
Diptera	Mycetophilidae	Bolitophila	499	120	GCA_010015015.1	NA	short	short	365298705	19	42952	4.63	96	1.2	97.2	1.5	1.3	100	27887292	0.0763	49136	0.0001	10995789	0.0301	24811360	0.0679	12299144	0.0338	1369822	0.0038	93356107	0.2556	0.546682	170768650	0.467477	0.546682	365298705	194530055	0.532523	5.10119e+07	2.01137e+07	4.53854e+07	24736851	602	73907	780865	130	101	YES
Hemiptera	Fulgoridae	Zanna	365	NA_quality	GCA_010016005.1	NA	short	short	2108144912	9.32	10725	4.03	47.4	0.2	47.6	32.3	20.1	100	222135369	0.1054	52709650	0.025	10853249	0.0052	285949456	0.1356	59208352	0.0281	41056267	0.0195	381860062	0.1811	NA_quality	1053772405	0.499858	NA_quality	2108144912	1054372507	0.500142	NA_quality	NA_quality	NA_quality	281640669	124064	4184723	2869205	146	115	NA_quality
Hymenoptera	Figitidae	Leptopilina	301	443	GCA_010016045.1	NA	short	short	404860936	22	9822	3.99	95.8	0.6	96.4	2	1.6	100	5508504	0.0136	94505	0.0002	7359494	0.0181	23521361	0.0581	14939651	0.037	2049326	0.005	153863593	0.38	0.742096	207336434	0.512118	0.742096	404860936	197524502	0.487882	7.4229e+06	9.91717e+06	3.16958e+07	22179364	96187	1245810	735261	250	131	YES
Coleoptera	Scarabaeidae	Chrysina	580	287	GCA_010091895.1	NA	short	short	611439635	0	20382	4.31	77.9	0.4	78.3	11.7	10	100	60359086	0.0987	2882713	0.0047	5672818	0.0093	108800840	0.178	5533321	0.009	7043791	0.0115	83231988	0.1361	0.304294	273524557	0.447345	NA_quality	611439635	337915078	0.552655	NA_quality	NA_quality	NA_quality	107034701	218534	1547605	670072	132	100	NO
Hymenoptera	Formicidae	Solenopsis	302	364	GCA_010367695.1	NA	long	pacbio	413978255	22	1041028	6.02	96.3	2.6	98.9	0.7	0.4	100	16178572	0.039	46417	0.0001	25602743	0.0618	75120969	0.1815	9900020	0.0238	7014888	0.017	64462625	0.1557	0.325033	198326234	0.479074	0.325033	413978255	215652021	0.520926	4.97751e+07	7.87696e+07	2.31118e+08	65426151	920120	8774698	292901	234	146	YES
Hymenoptera	Vespidae	Polistes	181	402	GCA_010416905.1	NA	short	short	209288276	7	53673	4.73	98.9	0.4	99.3	0	0.7	100	3337771	0.016	1403	0	2893290	0.0138	7024080	0.0336	20579203	0.0983	1334883	0.0064	18915905	0.0903	0.349734	54086535	0.258431	0.349734	209288276	155201741	0.741569	9.54374e+06	8.27283e+06	2.00841e+07	6978308	601	45171	80701	256	124	YES
Hymenoptera	Vespidae	Polistes	189	400	GCA_010416925.1	NA	long	pacbio	219838961	16	1605847	6.21	98.4	1.1	99.5	0	0.5	100	4290499	0.0196	333651	0.0015	6312918	0.0288	8160763	0.0371	20678520	0.0941	880288	0.004	24616291	0.112	0.377129	65272930	0.296912	0.377129	219838961	154566031	0.703088	1.13768e+07	1.67394e+07	2.16392e+07	8104103	1246	55414	92835	281	119	YES
Hymenoptera	Vespidae	Polistes	188	401	GCA_010416935.1	NA	long	pacbio	219116742	11	879627	5.94	98.4	0.7	99.1	0.3	0.6	100	5075514	0.0232	61680	0.0003	6109436	0.0279	8029997	0.0367	18841640	0.086	1593539	0.0072	23474815	0.1072	0.371516	63186621	0.28837	0.371516	219116742	155930121	0.71163	1.36616e+07	1.64446e+07	2.16142e+07	8003791	302	25904	90868	279	123	YES
Hymenoptera	Formicidae	Odontomachus	298	398	GCA_010583005.1	NA	short	short	393036571	16	22002	4.34	97.7	1.3	99	0.3	0.7	100	8358024	0.0213	2003695	0.0051	9160260	0.0233	49919626	0.127	11339410	0.0287	4012538	0.0102	80280602	0.2043	0.486331	165074155	0.419997	0.486331	393036571	227962416	0.580003	1.71859e+07	1.88355e+07	1.02645e+08	42709411	3099603	4110612	465440	184	132	YES
Hymenoptera	Apidae	Tetragonula	271	327	GCA_010645115.1	NA	short	short	299550189	1	13590	4.13	95.8	0.4	96.2	2	1.8	100	6311059	0.0211	2129	0	1131910	0.0037	10399883	0.0347	12248562	0.041	398139	0.0013	33981442	0.1134	0.527064	64473124	0.215233	0.527064	299550189	235077065	0.784767	1.1974e+07	2.14758e+06	1.97317e+07	10297732	4647	97504	195076	183	127	YES
Hymenoptera	Apidae	Tetragonula	267	329	GCA_010645135.1	NA	short	short	294049662	1	14852	4.17	96	0.3	96.3	1.9	1.8	100	1694352	0.0058	2531	0	836836	0.0028	9984142	0.034	14110336	0.048	528292	0.0017	27875759	0.0948	0.506535	55032248	0.187153	0.506535	294049662	239017414	0.812847	3.34499e+06	1.65208e+06	1.97107e+07	9837299	887	145956	189987	156	118	YES
Hymenoptera	Apidae	Tetragonula	256	325	GCA_010645165.1	NA	short	short	284611473	4	18510	4.27	96.8	0.3	97.1	1.2	1.7	100	1693428	0.006	2272	0	998617	0.0035	10486954	0.0369	13648450	0.0479	387784	0.0014	29163961	0.1025	0.517261	56381466	0.1981	0.517261	284611473	228230007	0.8019	3.27383e+06	1.93058e+06	2.0274e+07	10474909	550	11495	200938	152	113	YES
Hymenoptera	Apidae	Tetragonula	273	326	GCA_010645185.1	NA	short	short	307102115	4	10501	4.02	95.5	0.3	95.8	2.2	2	100	2419380	0.0079	2156	0	1220583	0.0039	11943291	0.0389	15314103	0.0499	520242	0.0017	32631648	0.1063	0.50946	64051403	0.208567	0.50946	307102115	243050712	0.791433	4.74891e+06	2.39584e+06	2.3443e+07	11929407	915	12969	203997	169	118	YES
Hymenoptera	Cynipidae	Belonocnema	314	439	GCA_010883055.1	NA	short	short	1538686255	178	19588	4.29	94.7	0.4	95.1	2.9	2	100	137699040	0.0895	3948878	0.0026	38646169	0.0251	179819391	0.1169	16683935	0.0108	94473662	0.0614	649953044	0.4224	0.579682	1121224119	0.728689	0.579682	1538686255	417462136	0.271311	2.37543e+08	6.66679e+07	3.10204e+08	171018824	839719	7960848	2873983	259	163	YES
Coleoptera	Elateridae	Ignelater	587	297	GCA_011009095.1	NA	short	short	842898625	76	31102	4.49	95.5	1.5	97	1.6	1.4	100	50646453	0.06	682984	0.0008	23052187	0.0274	116231380	0.1379	6232707	0.0074	5790071	0.0069	143661445	0.1704	0.41485	346297227	0.410841	0.41485	842898625	496601398	0.589159	1.22084e+08	5.55675e+07	2.80177e+08	114500883	1471615	258882	735947	205	135	YES
Coleoptera	Coccinellidae	Harmonia	574	279	GCA_011033045.1	SRR13482200	long	pacbio	417140630	139	1254346	6.1	91.2	2.4	93.6	1	5.4	100	39473920	0.0946	298987	0.0007	12330950	0.0295	92836526	0.2225	1958188	0.0046	7603036	0.0182	89184508	0.2138	0.365981	243686115	0.584182	0.365981	417140630	173454515	0.415818	1.07858e+08	3.36929e+07	2.53665e+08	86657345	5902456	276725	438231	216	126	YES
Hemiptera	Reduviidae	Triatoma	355	492	GCA_011037195.1	NA	long	pacbio	949486157	174	95318	4.98	89	1.7	90.7	2	7.3	100	171274592	0.1803	12026354	0.0127	29569308	0.0312	87787552	0.0924	19514223	0.0206	162771855	0.1715	106450218	0.1122	0.18061	589394102	0.620751	0.18061	949486157	360092055	0.379249	9.48314e+08	1.63719e+08	4.86063e+08	73074318	2316094	12397140	591346	204	144	YES
Diptera	Drosophilidae	Drosophila	420	37	GCA_011057485.1	NA	short	short	168095110	4	2852	3.46	98.5	0.5	99	0.2	0.8	100	5786350	0.0345	4829	0	19198364	0.1142	2440952	0.0146	3433236	0.0205	1199205	0.007	4906363	0.0292	0.132715	36969299	0.219931	0.132715	168095110	131125811	0.780069	4.36e+07	1.44659e+08	1.83925e+07	2006306	256	434390	30794	172	112	YES
Lepidoptera	Noctuidae	Spodoptera	127	225	GCA_011064685.1	NA	long	pacbio	486271792	61	1129999	6.05	90.1	2.4	92.5	1.3	6.2	100	44579386	0.0917	15835027	0.0325	5896196	0.0122	10062204	0.0207	5311943	0.011	29450853	0.0605	51097727	0.1051	0.314964	162233336	0.333627	0.314964	486271792	324038456	0.666373	1.41538e+08	1.87202e+07	3.19471e+07	9198086	132	863986	400307	141	108	YES
Hymenoptera	Apidae	Apis	187	338	GCA_011100585.1	NA	long	pacbio	215652617	1	3898192	6.59	99.6	0.2	99.8	0	0.2	100	441495	0.002	2001	0	542912	0.0025	2194968	0.0102	11399243	0.0528	54309	0.0002	7840462	0.0364	0.348847	22475390	0.104212	0.348847	215670033	193194643	0.895788	1.26559e+06	1.55631e+06	6.29207e+06	2187603	476	6889	36332	229	145	YES
Orthoptera	Gryllidae	Teleogryllus	32	524	GCA_011170035.1	NA	long	oxford	1933831998	144	197533	5.3	93.8	1.6	95.4	2.1	2.5	100	153424831	0.0793	35132321	0.0182	22176523	0.0114	158016674	0.0817	65950502	0.0341	47772771	0.0248	508440106	0.2629	0.513102	990913728	0.512405	0.513102	1933847499	942933771	0.487595	2.99014e+08	4.32205e+07	3.07963e+08	152946343	4022380	1047951	2126673	253	177	YES
Lepidoptera	Noctuidae	Spodoptera	117	226	GCA_011316535.1	NA	long	pacbio	446801326	97	3467000	6.54	95.9	1.7	97.6	0.2	2.2	100	47295597	0.1058	35665749	0.0798	15290142	0.0342	8454578	0.019	4411297	0.01	33456644	0.0748	25815306	0.0577	0.151508	170389313	0.381354	0.151508	446801326	276412013	0.618646	3.12166e+08	1.0092e+08	5.58029e+07	6830311	460	1623807	182819	153	102	YES
Lepidoptera	Papilionidae	Ornithoptera	155	NA_quality	GCA_011317755.1	NA	short	short	1287883780	9.11	11782	4.07	16.7	2.6	19.3	8.4	72.3	100	22301641	0.0173	1181135	0.0009	241363474	0.1875	39553739	0.0308	26928159	0.0209	10196002	0.0079	565984068	0.4395	NA_quality	907508218	0.704651	NA_quality	1287883780	380375562	0.295349	NA_quality	NA_quality	NA_quality	39546282	495	6962	3191311	196	150	NA_quality
Hemiptera	Cicadidae	Magicicada	364	NA_quality	GCA_011326945.1	NA	short	short	1579033894	9.2	14990	4.18	13.5	0.3	13.8	10.7	75.5	100	181471708	0.1149	3073608	0.0019	23026559	0.0146	103609836	0.0656	24995977	0.0159	37431734	0.0236	325504239	0.2061	NA_quality	699113661	0.442748	NA_quality	1579033894	879920233	0.557252	NA_quality	NA_quality	NA_quality	100884829	175080	2549927	2539738	138	109	NA_quality
Hymenoptera	Apidae	Frieseomelitta	249	331	GCA_011392965.1	NA	short	short	275421029	4	98566	4.99	98.3	0.4	98.7	0.6	0.7	100	2469122	0.009	1614	0	791951	0.0029	9240587	0.0335	13176564	0.0479	178207	0.0005	27109413	0.0984	0.511813	52967458	0.192304	0.511813	275436173	222468715	0.807696	4.82427e+06	1.54735e+06	1.80546e+07	9230167	424	9996	166631	171	129	YES
Hymenoptera	Ichneumonidae	Diadegma	165	NA_quality	GCA_011421695.1	NA	short	short	168496476	8.23	808	2.91	34.9	0.4	35.3	37.5	27.2	100	388562	0.0023	782	0	954600	0.0056	463953	0.0028	2570433	0.0152	105089	0.0006	5538035	0.0329	NA_quality	10021454	0.0594757	NA_quality	168496476	158475022	0.940524	NA_quality	NA_quality	NA_quality	400981	21094	41878	92967	65	53	NA_quality
Hymenoptera	Braconidae	Lysiphlebus	159	449	GCA_011426435.1	NA	long	pacbio	140705580	15	216143	5.33	88.2	9.3	97.5	0.2	2.3	100	1122959	0.008	54703	0.0004	1460294	0.0103	5428972	0.0386	13977012	0.0993	2322031	0.0164	24707421	0.1756	0.503479	49073392	0.348766	0.503479	140705580	91632188	0.651234	2.2304e+06	2.90041e+06	1.07829e+07	1739654	78568	3610750	70981	388	197	YES
Hymenoptera	Braconidae	Aphidius	158	448	GCA_011426455.1	SRR10311786	long	pacbio	138951524	5	25199	4.4	95	2.5	97.5	0.4	2.1	100	719128	0.0052	80991	0.0006	1380710	0.0099	2118384	0.0152	10837755	0.0778	521865	0.0037	16512394	0.1188	0.513266	32171227	0.231528	0.513266	138951524	106780297	0.768472	1.40108e+06	2.69005e+06	4.12726e+06	1258519	8958	850907	71100	248	153	YES
Hemiptera	Coccidae	Ericerus	351	482	GCA_011428145.1	NA	short	short	654859808	0	410234	5.61	82.7	4.2	86.9	1.3	11.8	100	3821107	0.0058	2027766	0.0031	121078974	0.1849	29240757	0.0446	9280654	0.0141	2778603	0.0042	212738226	0.3248	0.558418	380966087	0.581752	NA_quality	654859808	273893721	0.418248	NA_quality	NA_quality	NA_quality	21603908	3743981	3892868	954929	237	163	NO
Hymenoptera	Apidae	Tetragonula	288	328	GCA_011634685.1	NA	short	short	337571621	1	16398	4.21	96.6	0.3	96.9	1.3	1.8	100	2550863	0.0075	95379	0.0003	4337886	0.0129	11662434	0.0346	13957836	0.0414	929461	0.0028	38501856	0.1141	0.534483	72035715	0.213394	0.534483	337571621	265535906	0.786606	4.77258e+06	8.11604e+06	2.182e+07	11648451	676	13307	227124	179	121	YES
Hymenoptera	Cynipidae	Andricus	313	441	GCA_011634705.1	NA	short	short	1412754889	0	50606	4.7	67.8	0.7	68.5	20	11.5	100	101461849	0.0718	952264	0.0007	41132080	0.0291	151988246	0.1075	16437441	0.0116	153620849	0.1087	572584082	0.4053	0.551528	1038176811	0.73486	NA_quality	1412754889	374578078	0.26514	NA_quality	NA_quality	NA_quality	142920707	561107	8506432	3133071	215	133	NO
Diptera	Cecidomyiidae	Catotricha	489	118	GCA_011634745.1	NA	short	short	310190350	28	34753	4.54	95.7	1.8	97.5	1.4	1.1	100	2696993	0.0087	20153	0.0001	1346241	0.0043	7083128	0.0228	13969272	0.0449	550304	0.0019	74334360	0.2396	0.74334	100000451	0.322384	0.74334	310190350	210189899	0.677616	3.62821e+06	1.81107e+06	9.52878e+06	6688718	1196	393214	621449	128	98	YES
Hymenoptera	Figitidae	Leptopilina	293	445	GCA_011634795.1	NA	long	pacbio	375718377	44	185141	5.27	92.8	2.7	95.5	1.3	3.2	100	6623321	0.0177	731809	0.0019	15107744	0.0402	35543987	0.0946	14469402	0.0384	4846879	0.0129	109638693	0.2918	0.586423	186961835	0.497612	0.586423	375718377	188756542	0.502388	1.12944e+07	2.57625e+07	6.06115e+07	32155010	274469	3114508	461724	258	146	YES
Hymenoptera	Formicidae	Tetramorium	201	369	GCA_011636585.1	NA	short	short	227078691	5	29160	4.46	97.2	0.2	97.4	1.7	0.9	100	1986175	0.0087	11299	0	4499819	0.0198	9213048	0.0406	6581520	0.029	1081611	0.0047	12545722	0.0553	0.349276	35919194	0.15818	0.349276	227078691	191159497	0.84182	5.68654e+06	1.28833e+07	2.63775e+07	7224795	261931	1726322	79460	166	128	YES
Hymenoptera	Formicidae	Tetramorium	200	368	GCA_011636605.1	NA	short	short	229238156	4	28450	4.45	97	0.4	97.4	1.2	1.4	100	1911742	0.0084	1485	0	4721497	0.0206	10095438	0.044	6488652	0.0283	817914	0.0036	12535578	0.0547	0.342761	36572306	0.159538	0.342761	229238156	192665850	0.840462	5.57747e+06	1.37749e+07	2.94532e+07	8320786	199636	1575016	78728	165	123	YES
Hymenoptera	Formicidae	Tetramorium	208	367	GCA_011636635.1	NA	short	short	232155731	3	20247	4.31	97.9	0.6	98.5	1	0.5	100	1703946	0.0074	100262	0.0004	5182438	0.0224	8567391	0.0369	6554789	0.0283	689540	0.003	13623418	0.0587	0.374046	36421784	0.156885	0.374046	232155731	195733947	0.843115	4.55545e+06	1.38551e+07	2.29047e+07	7551663	235409	780319	83550	173	122	YES
Hymenoptera	Formicidae	Tetramorium	199	370	GCA_011638315.1	NA	short	short	229641016	8	16795	4.23	95.5	0.3	95.8	2.9	1.3	100	1335557	0.0058	17763	0.0001	4564146	0.0199	9587415	0.0417	6147510	0.0268	563887	0.0025	13829488	0.0602	0.383665	36045766	0.156966	0.383665	229641016	193595250	0.843034	3.48105e+06	1.18962e+07	2.4989e+07	7751608	244274	1591533	88207	163	124	YES
Diptera	Drosophilidae	Drosophila	377	74	GCA_011750605.1	NA	long	hi-c	118492362	4	1002992	6	96.3	1.2	97.5	0.5	2	100	2783406	0.0235	1784	0	1289355	0.0109	848952	0.0072	7471352	0.0631	1072964	0.0091	2213092	0.0187	0.141133	15680905	0.132337	0.141133	118492362	102811457	0.867663	1.97219e+07	9.13575e+06	6.01527e+06	843158	273	5521	18495	126	82	YES
Hymenoptera	Cynipidae	Callirhytis	311	442	GCA_011762715.1	NA	short	short	1117281825	0	22387	4.35	77.5	0.7	78.2	13.5	8.3	100	106061452	0.0949	5605800	0.005	25263410	0.0227	84718384	0.0759	11814645	0.0105	24377537	0.0218	483663333	0.4329	0.652273	741504561	0.663668	NA_quality	1117281825	375777264	0.336332	NA_quality	NA_quality	NA_quality	79983866	2061081	2673437	2415346	223	145	NO
Odonata	Chlorocyphidae	Rhinocypha	36	527	GCA_011762765.1	NA	short	short	1871797026	0	24885	4.4	77.5	7.8	85.3	6.3	8.4	100	168779287	0.0902	19301986	0.0103	14637660	0.0078	52410050	0.028	54525586	0.0292	22246961	0.0119	256184389	0.1368	0.435624	588085919	0.314183	NA_quality	1871797026	1283711107	0.685817	NA_quality	NA_quality	NA_quality	51933270	2157	474623	2005610	139	103	NO
Lepidoptera	Papilionidae	Papilio	104	213	GCA_011763625.1	NA	short	short	402687642	0	18540	4.27	59.8	0.4	60.2	24.9	14.9	100	49651926	0.1233	15602595	0.0388	1846523	0.0046	6165190	0.0153	4418687	0.0111	57767990	0.1434	30533952	0.0758	0.183954	165986863	0.412198	NA_quality	402687642	236700779	0.587802	NA_quality	NA_quality	NA_quality	6149277	449	15464	309718	106	87	NO
Hemiptera	Aleyrodidae	Trialeurodes	353	486	GCA_011764245.1	NA	long	pacbio	787484423	167	499458	5.7	92.1	2	94.1	0.9	5	100	9076678	0.0116	2482754	0.0032	14243066	0.0181	92632492	0.1176	18355831	0.0233	3519797	0.0044	329574505	0.4185	0.701394	469885123	0.596691	0.701394	787484423	317599300	0.403309	1.29409e+07	2.03068e+07	1.32069e+08	85536445	5052983	2043064	1790295	199	149	YES
Hymenoptera	Halictidae	Megalopta	297	351	GCA_011865705.1	NA	short	short	390114368	12	30643	4.49	95.5	1.8	97.3	0.2	2.5	100	2235532	0.0057	2944	0	5302672	0.0136	28682592	0.0735	13292497	0.0341	1857107	0.0046	70134961	0.1797	0.577203	121508305	0.311468	0.577203	390114368	268606063	0.688532	3.87304e+06	9.18684e+06	4.96924e+07	28375227	551	306814	550724	140	110	YES
Hymenoptera	Apidae	Bombus	243	304	GCA_011952205.1	NA	long	oxford	266784621	4	2202782	6.34	99	0.4	99.4	0.3	0.3	100	6258114	0.0235	13249	0	15942291	0.0598	9303007	0.0348	5010724	0.0187	419491	0.0014	25920299	0.0972	0.412303	62867175	0.235648	0.412303	266784621	203917446	0.764352	1.51784e+07	3.86665e+07	2.25635e+07	9285970	711	16326	126748	215	135	YES
Hymenoptera	Apidae	Bombus	248	305	GCA_011952255.1	NA	long	oxford	275577952	2	2733020	6.44	99.5	0.1	99.6	0.3	0.1	100	7888771	0.0287	2422	0	21870310	0.0793	11314304	0.041	4930690	0.0178	561456	0.0021	25751592	0.0935	0.356081	72319545	0.262429	0.356081	275577952	203258407	0.737571	2.21544e+07	6.14195e+07	3.17746e+07	11266548	862	46894	120393	225	133	YES
Hymenoptera	Apidae	Bombus	255	303	GCA_011952275.1	NA	long	oxford	282133710	6	3064919	6.49	99.2	0.5	99.7	0.2	0.1	100	8663984	0.0307	2493	0	28714132	0.1017	8799194	0.0312	4992855	0.0176	662537	0.0024	25929271	0.0919	0.333433	77764466	0.27563	0.333433	282133710	204369244	0.72437	2.59842e+07	8.61165e+07	2.63897e+07	8697847	797	100550	127429	215	132	YES
Lepidoptera	Lasiocampidae	Dendrolimus	138	237	GCA_012273795.1	NA	long	pacbio	614070971	176	1359888	6.13	94.1	2.3	96.4	1.2	2.4	100	104927600	0.1709	25804098	0.042	17826947	0.029	22376397	0.0365	6118264	0.0099	57624766	0.0938	119089139	0.194	0.336631	353767211	0.576102	0.336631	614070971	260303760	0.423898	3.11699e+08	5.29569e+07	6.64715e+07	21369581	814902	191914	828721	155	116	YES
Lepidoptera	Pieridae	Zerene	66	201	GCA_012273895.1	NA	short	short	266421107	32	43484	4.64	93.2	2.1	95.3	1.1	3.6	100	6507170	0.0245	10448452	0.0392	579888	0.0022	2785247	0.0105	3746264	0.0141	27074230	0.1017	8962174	0.0337	0.149113	60103425	0.225596	0.149113	266421107	206317682	0.774404	4.36393e+07	3.88893e+06	1.86788e+07	2774143	552	10552	76022	124	99	YES
Hymenoptera	Megachilidae	Osmia	169	348	GCA_012274295.1	NA	long	pacbio	177071571	16	5475884	6.74	98.9	0.1	99	0.3	0.7	100	2182277	0.0123	9857	0	3436539	0.0194	6988540	0.0395	2888317	0.0163	1297786	0.0074	15186281	0.0858	0.474726	31989597	0.180659	0.474726	177071571	145081974	0.819341	4.59692e+06	7.239e+06	1.47212e+07	6141662	53232	793646	71954	223	122	YES
Hemiptera	Aphalaridae	Pachypsylla	344	483	GCA_012654025.1	NA	short	short	481970414	0	17590	4.25	88.4	0.7	89.1	4.9	6	100	25156359	0.0522	8493215	0.0176	2507847	0.0052	35340170	0.0733	8204702	0.017	34257838	0.071	124633857	0.2586	0.522368	238593988	0.495039	NA_quality	481970414	243376426	0.504961	NA_quality	NA_quality	NA_quality	34253001	394	1086775	1071420	128	88	NO
Lepidoptera	Gracillariidae	Conopomorpha	131	252	GCA_012932125.1	NA	short	short	497288140	0	11353	4.06	63.7	9.1	72.8	13.4	13.8	100	60167861	0.121	25211826	0.0507	6477204	0.013	7978033	0.0161	3371686	0.0067	36946048	0.0743	98652075	0.1983	0.413108	238804733	0.480214	NA_quality	497288140	258483407	0.519786	NA_quality	NA_quality	NA_quality	7952288	304	25441	842353	124	99	NO
Thysanoptera	Thripidae	Thrips	7	503	GCA_012932325.1	NA	long	pacbio	237830083	25	567478	5.75	96.6	0.4	97	0.2	2.8	100	607607	0.0025	637549	0.0027	1317203	0.0055	4361231	0.0184	12060132	0.0507	275073	0.001	51029875	0.2145	0.726004	70288670	0.295542	0.726004	237830083	167541413	0.704458	836919	1.81432e+06	6.00717e+06	4136689	0	224542	310994	180	120	YES
Hymenoptera	Pteromalidae	Pteromalus	284	416	GCA_012977825.2	NA	long	hi-c	338170873	11	98825	4.99	96.9	1	97.9	0.6	1.5	100	23340342	0.069	234398	0.0007	35946285	0.1063	27293240	0.0807	7663234	0.0226	8336783	0.0246	44364464	0.1312	0.301433	147178746	0.43522	0.301433	338170873	190992127	0.56478	7.74314e+07	1.19252e+08	9.05451e+07	11343817	654374	15295049	180226	260	154	YES
Hymenoptera	Colletidae	Colletes	247	354	GCA_013123115.1	NA	long	pacbio	273056604	22	6455398	6.81	98.2	1.2	99.4	0.1	0.5	100	3230380	0.0118	1909	0	5686886	0.0209	20851868	0.0764	2735886	0.0099	4201164	0.0153	34110708	`	0.481662	70818801	0.259356	0.481662	273056604	202237803	0.740644	6.70674e+06	1.18068e+07	4.32915e+07	20478557	472	372839	209497	183	117	YES
Diptera	Culicidae	Anopheles	475	139	GCA_013141755.1	NA	long	pacbio	243460342	22	38117870	7.58	95.5	3.9	99.4	0.2	0.4	100	13890626	0.0571	2416847	0.0099	12861047	0.0528	2204727	0.0091	3770274	0.0154	8895349	0.0365	13027895	0.0535	0.228292	57066765	0.234384	0.228292	243475713	186408948	0.765616	6.08458e+07	5.63359e+07	9.65748e+06	2200540	294	3893	42725	325	177	YES
Lepidoptera	Papilionidae	Papilio	52	216	GCA_013186455.1	NA	short	short	231123043	48	20902	4.32	93.6	0.3	93.9	3.4	2.7	100	11471421	0.0496	4776160	0.0206	400764	0.0017	3275611	0.0142	2231628	0.0096	14964118	0.0647	22240375	0.0963	0.374669	59360077	0.256833	0.374669	231123043	171762966	0.743167	3.06175e+07	1.06965e+06	8.74268e+06	3269410	352	5849	179006	131	108	YES
Hemiptera	Pemphigidae	Eriosoma	334	474	GCA_013282895.1	NA	short	short	334868328	18	157895	5.2	95	1.8	96.8	0.5	2.7	100	6836927	0.0205	1081	0	5048965	0.0151	31090147	0.0928	16013771	0.0478	585384	0.0017	45630567	0.1363	0.433722	105206842	0.314174	0.433722	334868328	229661486	0.685826	1.57634e+07	1.1641e+07	7.16821e+07	29636630	22885	1430632	195774	223	147	YES
Blattodea	Rhinotermitidae	Coptotermes	598	518	GCA_013340265.1	NA	short	short	875711502	74	159654	5.2	96.6	1.7	98.3	0.8	0.9	100	70878607	0.081	68831332	0.0786	2994723	0.0034	51304937	0.0586	14153552	0.0161	74699714	0.0853	164658973	0.188	0.367935	447521838	0.511038	0.367935	875711502	428189664	0.488962	1.92639e+08	8.13927e+06	1.3944e+08	50404907	688	899342	1030799	172	138	YES
Hymenoptera	Braconidae	Chelonus	157	454	GCA_013357705.1	NA	long	pacbio	135730493	10	1162728	6.07	98.8	0.4	99.2	0.2	0.6	100	1921623	0.0141	165970	0.0012	4831464	0.0356	5995102	0.0442	3239122	0.024	1146342	0.0084	10787901	0.0795	0.384082	28087524	0.206936	0.384082	135730493	107642969	0.793064	5.00316e+06	1.25793e+07	1.56089e+07	2496455	35323	3463324	46656	242	146	YES
Coleoptera	Lampyridae	Lamprigera	592	294	GCA_013368075.1	NA	long	pacbio	1052929944	176	3509824	6.55	97.5	1.3	98.8	0.5	0.7	100	111676162	0.1061	132814	0.0001	49057692	0.0466	235770119	0.224	9903561	0.0093	30163524	0.0286	306582626	0.2912	0.412469	743286498	0.705922	0.412469	1052929944	309643446	0.294078	2.7075e+08	1.18937e+08	5.71607e+08	212110926	695438	22963755	1305550	256	163	YES
Coleoptera	Lampyridae	Abscondita	576	295	GCA_013368085.1	NA	long	pacbio	499652588	36	1220005	6.09	96.5	2	98.5	0.3	1.2	100	33096969	0.0662	34622	0.0001	12211179	0.0244	40931212	0.0819	7670425	0.0153	7316569	0.0147	91243024	0.1826	0.47398	192504000	0.385276	0.47398	499652588	307148588	0.614724	6.98278e+07	2.57631e+07	8.63564e+07	35812334	4179119	939759	557095	177	125	YES
Coleoptera	Curculionidae	Hypothenemus	559	262	GCA_013372445.1	NA	short	short	162571498	9	36294	4.56	91.5	4.3	95.8	2.2	2	100	1008831	0.0062	2784	0	1576135	0.0097	14958190	0.092	1984507	0.0122	343859	0.0022	16510469	0.1015	0.453774	36384775	0.223808	0.453774	162571498	126186723	0.776192	2.2232e+06	3.47339e+06	3.2964e+07	14537856	144562	275772	100295	174	130	YES
Hymenoptera	Formicidae	Monomorium	278	366	GCA_013373865.2	NA	long	pacbio	325506644	25	1861574	6.27	96.6	2.4	99	0.4	0.6	100	5768449	0.0178	105282	0.0003	15143227	0.0465	42210362	0.1297	9960151	0.0306	4852141	0.0148	39908709	0.1226	0.338358	117948321	0.362335	0.338358	325522583	207574262	0.637665	1.70484e+07	4.47551e+07	1.24751e+08	36541480	475657	5193225	203177	211	143	YES
Coleoptera	Coccinellidae	Cryptolaemus	590	282	GCA_013387265.1	NA	long	oxford	988106770	322	10375940	7.02	95.9	1.1	97	0.7	2.3	100	265496560	0.2687	2701354	0.0027	16001770	0.0162	301943439	0.3055	9651564	0.0098	86572098	0.0876	120015681	0.1215	0.149574	802382466	0.81204	0.149574	988106770	185724304	0.18796	1.77502e+09	1.06982e+08	2.01869e+09	295907547	2207054	3828838	556417	231	145	YES
Lepidoptera	Nymphalidae	Heliconius	70	183	GCA_013403645.1	NA	short	short	275868317	54	460685	5.66	98.6	0.3	98.9	0.3	0.8	100	19420000	0.0704	120319	0.0004	1996486	0.0072	7424449	0.027	5394951	0.0195	56089089	0.2032	4459445	0.0162	0.0469886	94904739	0.344022	0.0469886	275868317	180963578	0.655978	4.13291e+08	4.24887e+07	1.58005e+08	7250610	234	173605	25066	187	113	YES
Lepidoptera	Nymphalidae	Heliconius	102	185	GCA_013403705.1	NA	short	short	391646345	73	118192	5.07	97.1	0.1	97.2	1.5	1.3	100	25933587	0.0662	987073	0.0025	5360733	0.0137	18709096	0.0478	7460958	0.019	122682509	0.3132	9124208	0.0233	0.047957	190258164	0.485791	0.047957	391646345	201388181	0.514209	5.40768e+08	1.11782e+08	3.90122e+08	18662021	204	46871	62309	157	109	YES
Coleoptera	Coccinellidae	Propylea	588	281	GCA_013421045.1	NA	long	pacbio	851227647	300	813984	5.91	88.5	6.2	94.7	1	4.3	100	74604650	0.0876	250191	0.0003	31405942	0.0369	155103144	0.1822	2860354	0.0033	34803007	0.041	264047527	0.3102	0.468939	563074815	0.661486	0.468939	851227647	288152832	0.338514	1.59093e+08	6.69724e+07	3.30754e+08	142098738	10288699	2715707	1116074	253	155	YES
Lepidoptera	Nymphalidae	Heliconius	105	186	GCA_013421065.1	NA	short	short	399744062	66	22696	4.36	95.1	0.6	95.7	1.7	2.6	100	22570526	0.0565	857348	0.0021	5776412	0.0144	18495408	0.0463	7053325	0.0176	126647847	0.3169	11105028	0.0277	0.0576867	192505894	0.481573	0.0576867	399744062	207238168	0.518427	3.91261e+08	1.00134e+08	3.20618e+08	18409697	568	85143	70724	168	108	YES
Lepidoptera	Nymphalidae	Agraulis	101	187	GCA_013421085.1	NA	short	short	390746361	59	8667	3.94	93.6	1.7	95.3	2.1	2.6	100	27822203	0.0712	1447426	0.0037	5613727	0.0143	9641412	0.0247	16393826	0.0419	54740746	0.1401	10441006	0.0267	0.0827992	126100346	0.322717	0.0827992	390746361	264646015	0.677283	3.3602e+08	6.77993e+07	1.16443e+08	9604798	575	36039	59338	190	132	YES
Diptera	Tephritidae	Rhagoletis	535	86	GCA_013731165.1	NA	short	short	1223288327	145	23570	4.37	79	15.3	94.3	1.8	3.9	100	137802842	0.1127	2304398	0.0019	62150312	0.0508	119034853	0.0973	15447656	0.0126	59530819	0.0486	365774864	0.299	0.479991	762045744	0.622949	0.479991	1223288327	461242583	0.377051	2.87095e+08	1.29482e+08	2.47994e+08	117520588	3614	1510651	2095357	191	131	YES
Diptera	Culicidae	Anopheles	426	149	GCA_013758885.1	NA	long	hi-c	172602732	5	25000043	7.4	98.2	0.9	99.1	0.2	0.7	100	1220057	0.0071	7190	0	1553146	0.009	2176364	0.0126	4773568	0.0276	562704	0.0032	3794515	0.022	0.269352	14087544	0.0816183	0.269352	172602732	158515188	0.918382	4.52959e+06	5.76622e+06	8.07998e+06	2170972	0	5392	21160	189	88	YES
Hymenoptera	Ichneumonidae	Campoletis	233	456	GCA_013761285.1	NA	short	short	256042896	11	72938	4.86	94.8	4.1	98.9	0.4	0.7	100	2833898	0.011	89529	0.0003	6500163	0.0254	8239396	0.0322	9831251	0.0384	1254831	0.0049	21833829	0.0852	0.431644	50582897	0.197556	0.431644	256042896	205459999	0.802444	6.56535e+06	1.50591e+07	1.90884e+07	7297050	100736	841610	93024	248	133	YES
Coleoptera	Meloidae	Hycleus	556	278	GCA_013841185.1	NA	short	short	90869815	1	75478	4.88	99.3	0.1	99.4	0.1	0.5	100	1177697	0.013	9177	0.0001	285794	0.0032	1307599	0.0144	2179634	0.0239	826231	0.0091	7004835	0.077	0.547639	12790967	0.140761	0.547639	90869815	78078848	0.859239	2.1505e+06	521865	2.3877e+06	981093	37127	289379	55337	141	105	YES
Hymenoptera	Apidae	Apis	196	334	GCA_013841205.1	NA	long	pacbio	224766697	1	3303520	6.52	99.6	0	99.6	0	0.4	100	105546	0.0005	1815	0	699613	0.0031	4629820	0.0206	13131363	0.0584	24951	0.0001	8080718	0.036	0.302946	26673826	0.118673	0.302946	224766697	198092871	0.881327	348399	2.30937e+06	1.52827e+07	4622405	174	7241	37032	234	156	YES
Coleoptera	Meloidae	Hycleus	557	277	GCA_013841215.1	NA	short	short	99165299	6	86942	4.94	99.4	0.1	99.5	0.1	0.4	100	1168854	0.0118	13114	0.0001	481143	0.0048	2313108	0.0234	2200646	0.0223	632938	0.0063	11453217	0.1155	0.627126	18263020	0.184167	0.627126	99165299	80902279	0.815833	1.86383e+06	767219	3.68843e+06	1890752	33386	388970	72217	172	115	YES
Hymenoptera	Apidae	Apis	195	335	GCA_013841245.1	NA	long	pacbio	226044179	2	2692667	6.43	99.3	0.2	99.5	0	0.5	100	84864	0.0004	1897	0	968683	0.0043	4180934	0.0185	13132389	0.058	27145	0.0001	9170769	0.0405	0.332676	27566681	0.121953	0.332676	226044179	198477498	0.878047	255095	2.91179e+06	1.25676e+07	4174207	307	6420	38579	258	153	YES
Lepidoptera	Papilionidae	Graphium	145	NA_quality	GCA_014048405.1	NA	short	short	730516760	8.86	110680	5.04	27.1	0.5	27.6	32	40.4	100	55909277	0.0766	51454771	0.0704	1947748	0.0026	11562510	0.0159	11906291	0.0163	27611175	0.0378	55534751	0.076	NA_quality	215926523	0.295581	NA_quality	730516760	514590237	0.704419	NA_quality	NA_quality	NA_quality	11518990	1554	41966	659490	93	80	NA_quality
Hymenoptera	Apidae	Apis	194	339	GCA_014066325.1	NA	short	short	226063288	1	303790	5.48	99.5	0	99.5	0.1	0.4	100	78558	0.0004	1370	0	547602	0.0024	1160680	0.0051	14134772	0.0626	188954	0.0008	7741542	0.0343	0.324546	23853478	0.105517	0.324546	226063288	202209810	0.894483	242055	1.68729e+06	3.57632e+06	1151588	277	8815	41472	196	149	YES
Hymenoptera	Vespidae	Vespa	219	408	GCA_014083535.1	NA	long	pacbio	247710421	4	2778186	6.44	98.9	0.4	99.3	0	0.7	100	1852415	0.0075	1765	0	1186225	0.0047	2715450	0.0109	52423628	0.2116	63482	0.0002	43733590	0.1766	0.428859	101976555	0.411642	0.428859	247731252	145754697	0.588358	4.3194e+06	2.766e+06	6.3318e+06	2694450	457	20543	136251	332	92	YES
Hemiptera	Anthocoridae	Orius	335	488	GCA_014119065.1	NA	long	pacbio	328990643	0	102366	5.01	63.2	22.8	86	4	10	100	9312669	0.0283	610221	0.0018	8510933	0.0259	28897827	0.0879	3996864	0.0121	11274218	0.0343	65714442	0.1997	0.512125	128317174	0.390033	NA_quality	328990643	200673469	0.609967	NA_quality	NA_quality	NA_quality	27863897	232469	801461	385568	199	117	NO
Lepidoptera	Saturniidae	Samia	116	233	GCA_014132275.1	NA	long	pacbio	450479495	179	21366385	7.33	96.9	0.4	97.3	1.5	1.2	100	86774721	0.1926	3259277	0.0072	6529804	0.0145	14504304	0.0322	5174639	0.0115	40374882	0.0896	59918467	0.133	0.276714	216536094	0.480679	0.276714	450479495	233943401	0.519321	3.1359e+08	2.35977e+07	5.24163e+07	14381193	64588	58523	426065	153	115	YES
Coleoptera	Curculionidae	Listronotus	594	264	GCA_014170235.1	NA	long	oxford	1112438712	0	120328	5.08	82.2	5.1	87.3	6.5	6.2	100	93823642	0.0844	4004396	0.0036	19728324	0.0177	183796648	0.1652	9207340	0.0083	28914905	0.0259	480036705	0.4315	0.585759	819511960	0.736681	NA_quality	1112438712	292926752	0.263319	NA_quality	NA_quality	NA_quality	150584049	26862359	6350240	2376492	217	141	NO
Diptera	Drosophilidae	Drosophila	451	22	GCA_014170255.1	NA	long	oxford	198798533	13	1098508	6.04	93.4	1.8	95.2	0.6	4.2	100	12580993	0.0633	24653	0.0001	17667009	0.0889	7217362	0.0363	5900446	0.0296	12711127	0.064	12699818	0.0638	0.184587	68801408	0.346086	0.184587	198798533	129997125	0.653914	6.81577e+07	9.57112e+07	3.91001e+07	5861072	5577	1350713	62071	215	132	YES
Coleoptera	Tenebrionidae	Tenebrio	569	275	GCA_014282415.1	NA	short	short	280756464	0	24135	4.38	82.8	4.2	87	4.6	8.4	100	9986040	0.0355	39525	0.0001	3242909	0.0116	27447887	0.0978	1619340	0.0057	1700808	0.006	77995295	0.2777	0.639139	122031804	0.434616	NA_quality	280780514	158748710	0.565384	NA_quality	NA_quality	NA_quality	20287145	6070639	1090103	396742	205	147	NO
Lepidoptera	Saturniidae	Antheraea	142	234	GCA_014332785.1	NA	long	pacbio	698407906	178	64049	4.81	91.5	6	97.5	0.8	1.7	100	130745188	0.1872	22223803	0.0318	15419800	0.0221	29311995	0.042	5352478	0.0076	85523898	0.1225	95021565	0.1361	0.247711	383598727	0.549247	0.247711	698407906	314809179	0.450753	5.27814e+08	6.22492e+07	1.18331e+08	29079341	53906	178748	615496	167	120	YES
Hemiptera	Delphacidae	Sogatella	350	499	GCA_014356515.1	NA	short	short	656291902	167	57334	4.76	92	2.1	94.1	3	2.9	100	25442486	0.0388	2377930	0.0036	6654365	0.0101	19609635	0.0298	14451056	0.022	13794838	0.0211	167420415	0.2551	0.67035	249750725	0.380548	0.67035	656291902	406541177	0.619452	3.7954e+07	9.9267e+06	2.92528e+07	15614145	3438089	557401	1070849	172	119	YES
Hemiptera	Delphacidae	Nilaparvata	359	500	GCA_014356525.1	NA	long	pacbio	1087807972	245	583858	5.77	92.7	2.5	95.2	1.4	3.4	100	104953911	0.0965	5409011	0.005	42756825	0.0393	84880716	0.078	25621477	0.0235	42039924	0.0387	348777466	0.3206	0.532941	654439330	0.601613	0.532941	1087807972	433368642	0.398387	1.96934e+08	8.02281e+07	1.59269e+08	46381067	15142733	23356916	1703376	224	133	YES
Coleoptera	Curculionidae	Rhynchophorus	579	266	GCA_014462685.1	NA	short	short	589385395	86	37927	4.58	96.6	2.6	99.2	0.4	0.4	100	70505082	0.1197	8485377	0.0144	3378949	0.0057	123092077	0.2089	7673352	0.013	19049729	0.0322	70910983	0.1204	0.233956	303095549	0.514242	0.233956	589402552	286307003	0.485758	3.01361e+08	1.44427e+07	5.26134e+08	123084101	482	7494	423027	189	130	YES
Hymenoptera	Vespidae	Vespula	168	405	GCA_014466175.1	NA	short	short	179370016	1	96617	4.99	99.5	0.1	99.6	0	0.4	100	243224	0.0013	30188	0.0002	483342	0.0026	1558543	0.0087	21531244	0.1201	18032	0.0001	11482616	0.064	0.324852	35347189	0.197063	0.324852	179370016	144022827	0.802937	748722	1.48788e+06	4.7977e+06	1536370	302	21871	107658	118	92	YES
Hymenoptera	Vespidae	Vespula	167	407	GCA_014466185.1	NA	short	short	176272557	2	7528	3.88	98.7	0.1	98.8	0.4	0.8	100	301991	0.0017	1930	0	1018624	0.0058	1829513	0.0104	18674378	0.1059	38610	0.0003	9265653	0.0525	0.297637	31130699	0.176605	0.297637	176272557	145141858	0.823395	1.01463e+06	3.42237e+06	6.14679e+06	1804987	283	24243	86073	118	89	YES
Hymenoptera	Vespidae	Vespula	166	406	GCA_014466195.1	NA	short	short	178197338	1	84379	4.93	98	0	98	0.9	1.1	100	300689	0.0017	1787	0	861451	0.0048	1479203	0.0083	20145093	0.113	21313	0.0001	12381706	0.0695	0.351841	35191242	0.197485	0.351841	178197338	143006096	0.802515	854617	2.44841e+06	4.20419e+06	1442064	14564	22575	105428	130	90	YES
Megaloptera	Corydalidae	Neoneuromus	37	301	GCA_014529405.1	NA	short	short	767796098	0	2248	3.35	66.9	11.9	78.8	7.3	13.9	100	29109716	0.0379	963339	0.0012	3597851	0.0047	112100402	0.146	45861544	0.0597	1807633	0.0023	84168482	0.1096	0.303191	277608967	0.361542	NA_quality	767846946	490237979	0.638458	NA_quality	NA_quality	NA_quality	112084946	1558	13898	774810	125	94	NO
Diptera	Sciaridae	Bradysia	488	119	GCA_014529535.1	NA	long	pacb_oxford	309728657	65	2330419	6.37	96.3	3.1	99.4	0.4	0.2	100	10483331	0.0338	754496	0.0024	4935981	0.0159	6418109	0.0207	2884115	0.0092	2332669	0.0075	92955888	0.3	0.769728	120764589	0.389847	0.769728	309774170	189009581	0.610153	1.36195e+07	6.41263e+06	8.33815e+06	3581944	2218218	617947	539162	186	117	YES
Lepidoptera	Hesperiidae	Epargyreus	112	208	GCA_014595695.1	NA	long	pacbio	426663811	0	3745284	6.57	78.1	8.1	86.2	1.5	12.3	100	29799362	0.0699	46911631	0.1099	8757561	0.0206	12190873	0.0286	5015272	0.0118	25660026	0.0602	37220917	0.0873	0.224824	165555642	0.388024	NA_quality	426663811	261108169	0.611976	NA_quality	NA_quality	NA_quality	11599930	265595	325348	227562	176	118	NO
Lepidoptera	Carposinidae	Carposina	106	249	GCA_014607495.2	NA	long	pacbio	399040036	195	2597711	6.41	96.9	0.8	97.7	0.4	1.9	100	39105666	0.098	6221540	0.0156	14170477	0.0355	19078972	0.0478	2886045	0.0072	37817104	0.0948	75280287	0.1887	0.386926	194560091	0.48757	0.386926	399040036	204479945	0.51243	1.01068e+08	3.66233e+07	4.93091e+07	17438297	144023	1496652	520182	158	109	YES
Coleoptera	Elateridae	Limonius	593	298	GCA_014611495.1	SRR10807532	long	pacbio	1072670101	0	19395	4.29	80.5	6.1	86.6	8.9	4.5	100	115517327	0.1076	15698090	0.0146	18526369	0.0173	214368128	0.1999	9652784	0.009	14695912	0.0137	220752408	0.2058	0.362358	609211018	0.567939	NA_quality	1072670101	463459083	0.432061	NA_quality	NA_quality	NA_quality	208150983	3800823	2416322	1148255	206	139	NO
Diptera	Chironomidae	Polypedilum	379	159	GCA_014622435.1	NA	short	short	122915671	7	16153	4.21	95.4	2	97.4	0.4	2.2	100	380168	0.003	229095	0.0019	312255	0.0025	1120716	0.0091	2380688	0.0194	614710	0.0049	18359504	0.1494	0.78469	23397136	0.190351	0.78469	122915671	99518535	0.809649	484482	397934	1.42823e+06	1076203	119	44394	131987	154	115	YES
Diptera	Sarcophagidae	Sarcophaga	528	96	GCA_014635995.1	NA	long	pacbio	560735179	97	3839545	6.58	96.9	0.5	97.4	0.7	1.9	100	65142025	0.1162	12135580	0.0216	13180089	0.0235	88305286	0.1575	19570940	0.0349	7915975	0.0142	77907119	0.1389	0.274169	284157014	0.506758	0.274169	560735179	276578165	0.493242	2.37598e+08	4.80728e+07	3.22083e+08	87040314	7730	1257242	460287	189	122	YES
Hymenoptera	Apidae	Bombus	226	310	GCA_014737335.1	NA	short	short	245790074	6	427351	5.63	97.2	0.1	97.3	1.2	1.5	100	4070655	0.0166	1786	0	4115758	0.0167	6598042	0.0268	4647839	0.0189	375279	0.0015	21644772	0.0881	0.522138	41454131	0.168657	0.522138	245790074	204335943	0.831343	7.79613e+06	7.88251e+06	1.26366e+07	6586956	275	10811	120713	186	130	YES
Hymenoptera	Apidae	Bombus	218	318	GCA_014737355.1	NA	short	short	242038170	4	488970	5.69	99	0.7	99.7	0.1	0.2	100	4761414	0.0197	2556	0	4003850	0.0166	5851151	0.0242	5315211	0.0219	188289	0.0007	21085405	0.0871	0.511684	41207876	0.170254	0.511684	242038170	200830294	0.829746	9.30538e+06	7.82485e+06	1.14351e+07	5827094	550	23507	108107	202	141	YES
Hymenoptera	Apidae	Bombus	225	321	GCA_014737365.1	NA	short	short	243573539	5	582038	5.76	96.8	0.1	96.9	1.1	2	100	2612367	0.0108	45453	0.0002	2353479	0.0096	8256175	0.0339	5046365	0.0207	327702	0.0014	20796332	0.0854	0.527319	39437873	0.161914	0.527319	243573539	204135666	0.838086	4.95406e+06	4.4631e+06	1.56569e+07	6870398	769	1385008	118417	183	130	YES
Hymenoptera	Apidae	Bombus	203	323	GCA_014737385.1	NA	short	short	230139620	1	988972	6	99.1	0.4	99.5	0.3	0.2	100	1243835	0.0054	3237	0	1069728	0.0046	3552598	0.0155	5587532	0.0242	166032	0.0008	14380310	0.0625	0.553019	26003272	0.112989	0.553019	230139620	204136348	0.887011	2.24917e+06	1.93434e+06	6.424e+06	3538218	877	13503	93651	159	131	YES
Hymenoptera	Apidae	Bombus	202	324	GCA_014737395.1	NA	short	short	231149577	1	1152409	6.06	99.1	0.2	99.3	0.3	0.4	100	1257192	0.0054	1910	0	1984339	0.0086	3751596	0.0163	5929201	0.0255	192947	0.0009	13513930	0.0584	0.507449	26631115	0.115212	0.507449	231149577	204518462	0.884788	2.47748e+06	3.91042e+06	7.39305e+06	3598783	729	152084	89072	158	130	YES
Hymenoptera	Apidae	Bombus	217	320	GCA_014737405.1	NA	short	short	242353651	1	731585	5.86	98.4	0.3	98.7	0.7	0.6	100	2961314	0.0122	1822	0	2469539	0.0102	5057954	0.0209	4988153	0.0205	271861	0.001	21969160	0.0906	0.58243	37719803	0.15564	0.58243	242353651	204633848	0.84436	5.08441e+06	4.24006e+06	8.68422e+06	5043506	1809	12639	120062	190	135	YES
Hymenoptera	Apidae	Bombus	230	316	GCA_014737455.1	NA	short	short	249068899	2	707207	5.85	99.3	0.2	99.5	0.2	0.3	100	2706980	0.0108	1395	0	3346050	0.0135	5079900	0.0204	6070081	0.0243	262494	0.0011	27149095	0.109	0.608506	44615995	0.179131	0.608506	249068899	204452904	0.820869	4.44857e+06	5.4988e+06	8.34815e+06	5064777	1829	13294	123704	232	134	YES
Hymenoptera	Apidae	Bombus	216	322	GCA_014737475.1	NA	short	short	239101172	3	411713	5.61	99	0.2	99.2	0.5	0.3	100	2108438	0.0088	1409	0	1604044	0.0067	5371668	0.0225	4981259	0.0208	296222	0.0013	19020964	0.0796	0.569763	33384004	0.139623	0.569763	239101172	205717168	0.860377	3.70055e+06	2.81528e+06	9.4279e+06	5026624	1639	343405	104826	187	131	YES
Hymenoptera	Apidae	Bombus	229	307	GCA_014737485.1	NA	short	short	253987937	5	377516	5.58	98.3	0.1	98.4	0.8	0.8	100	5611901	0.0221	1966	0	4665892	0.0184	8160121	0.0322	5138835	0.0201	577992	0.0024	24722497	0.0974	0.505788	48879204	0.192447	0.505788	253987937	205108733	0.807553	1.10954e+07	9.225e+06	1.61335e+07	5090268	1308	3068545	125607	203	139	YES
Hymenoptera	Apidae	Bombus	239	311	GCA_014737505.1	NA	short	short	262420024	5	561947	5.75	99.3	0.2	99.5	0.2	0.3	100	4339479	0.0165	1644	0	3061641	0.0117	6363468	0.0242	4956350	0.0188	12423121	0.0473	26719415	0.1018	0.461753	57865118	0.220506	0.461753	262420024	204554906	0.779494	9.39783e+06	6.63047e+06	1.37811e+07	6349983	1323	12162	121224	226	133	YES
Hymenoptera	Apidae	Bombus	224	317	GCA_014737525.1	NA	short	short	243560081	2	338993	5.53	99	0	99	0.4	0.6	100	3214229	0.0131	2473	0	3357664	0.0138	5006128	0.0205	5172578	0.0211	2651159	0.0107	19533507	0.0802	0.50166	38937738	0.159869	0.50166	243560081	204622343	0.840131	6.40719e+06	6.69311e+06	9.97912e+06	4990394	2193	13541	115665	175	129	YES
Hymenoptera	Apidae	Bombus	223	312	GCA_014737535.1	NA	short	short	246986414	7	1128213	6.05	99.1	0.3	99.4	0.1	0.5	100	3632546	0.0147	1887	0	5858848	0.0237	6516817	0.0264	4776157	0.0192	248444	0.001	19283136	0.0781	0.478278	40317835	0.163239	0.478278	246986414	206668579	0.836761	7.59505e+06	1.22499e+07	1.36256e+07	6502536	756	13525	116609	172	128	YES
Diptera	Drosophilidae	Drosophila	481	32	GCA_014743375.1	NA	long	pacbio	276444044	13	11590999	7.06	98.5	1.1	99.6	0.2	0.2	100	21467684	0.0777	241177	0.0009	47131331	0.1705	17514640	0.0633	9048591	0.0327	25012148	0.0904	17453312	0.0631	0.126594	137868883	0.498723	0.126594	276444044	138575161	0.501277	1.6958e+08	3.72304e+08	1.38353e+08	5964547	11101	11538992	60723	311	136	YES
Hymenoptera	Formicidae	Pseudomyrmex	177	395	GCA_014825455.1	NA	short	short	200367487	5	22233	4.35	95.6	0.5	96.1	1.8	2.1	100	4749878	0.0238	1510	0	3786526	0.0189	5751114	0.0287	6767468	0.0338	2144140	0.0108	15936874	0.0796	0.407202	39137510	0.195329	0.407202	200367487	161229977	0.804671	1.16647e+07	9.29889e+06	1.41235e+07	5219158	43664	488292	108839	155	105	YES
Hymenoptera	Formicidae	Pseudomyrmex	176	394	GCA_014825475.1	NA	short	short	198472643	8	35663	4.55	97.8	0.4	98.2	0.7	1.1	100	3780989	0.019	15345	0.0001	3323441	0.0168	6053561	0.0305	7102293	0.0358	2203104	0.0112	14864578	0.0749	0.398052	37343311	0.188153	0.398052	198472643	161129332	0.811847	9.49873e+06	8.34926e+06	1.5208e+07	5137692	41531	874338	95548	165	115	YES
Hymenoptera	Formicidae	Pseudomyrmex	220	390	GCA_014825605.1	NA	short	short	244058880	2	24312	4.39	97.3	1	98.3	0.7	1	100	6097959	0.025	1824	0	4694125	0.0192	6906654	0.0283	6987793	0.0287	3081049	0.0125	18979285	0.0777	0.405985	46748689	0.191547	0.405985	244058880	197310191	0.808453	1.50201e+07	1.15623e+07	1.70121e+07	6034830	40715	831109	115643	173	115	YES
Hymenoptera	Formicidae	Pseudomyrmex	185	392	GCA_014825645.1	NA	short	short	206595161	8	19353	4.29	96.5	0.4	96.9	1.5	1.6	100	5627922	0.0273	9062	0	4767761	0.0231	7210717	0.0349	6831542	0.0331	3269491	0.0159	18274608	0.0884	0.397351	45991103	0.222615	0.397351	206595161	160604058	0.777385	1.41636e+07	1.19989e+07	1.8147e+07	6042616	27951	1140150	116500	168	119	YES
Hymenoptera	Formicidae	Pseudomyrmex	180	391	GCA_014825685.1	NA	short	short	204624832	8	33812	4.53	97.6	0.4	98	0.9	1.1	100	5453923	0.0266	20217	0.0001	4398318	0.0215	6118806	0.0299	6665797	0.0326	2743631	0.0134	16143708	0.0789	0.388589	41544400	0.203027	0.388589	204624832	163080432	0.796973	1.40352e+07	1.13187e+07	1.57462e+07	5480058	38325	600423	101695	168	112	YES
Hymenoptera	Apidae	Bombus	222	319	GCA_014825825.1	NA	short	short	243111512	6	442685	5.65	99.2	0.3	99.5	0.4	0.1	100	3840000	0.0158	12850	0	3651747	0.0151	7938891	0.0327	5098738	0.0209	244496	0.001	19524254	0.0803	0.484341	40310976	0.165813	0.484341	243111512	202800536	0.834187	7.9283e+06	7.53962e+06	1.63911e+07	7923705	1357	13829	118499	172	137	YES
Hymenoptera	Apidae	Bombus	236	314	GCA_014825855.1	NA	short	short	254804690	5	781044	5.89	99.5	0.2	99.7	0.2	0.1	100	3659723	0.0143	2319	0	3041081	0.0119	17858975	0.0701	4905142	0.0192	326915	0.0013	18459728	0.0724	0.382554	48253883	0.189376	0.382554	254804690	206550807	0.810624	9.56655e+06	7.94941e+06	4.66835e+07	17845170	1285	12520	107059	178	134	YES
Hymenoptera	Apidae	Bombus	215	309	GCA_014825875.1	NA	short	short	242565149	5	714304	5.85	97.6	0.1	97.7	0.7	1.6	100	3862761	0.0159	14742	0.0001	3393412	0.014	5419686	0.0223	5769744	0.0237	289132	0.0012	19050061	0.0785	0.503976	37799538	0.155833	0.503976	242565149	204765611	0.844167	7.66457e+06	6.73328e+06	1.07539e+07	5406186	1601	11899	112514	176	133	YES
Hymenoptera	Apidae	Bombus	221	313	GCA_014825925.1	NA	short	short	248124274	5	1044356	6.02	99.4	0.2	99.6	0.1	0.3	100	4305072	0.0173	1797	0	3410315	0.0138	5221567	0.021	5077819	0.0204	271609	0.0011	24053747	0.097	0.568083	42341926	0.170648	0.568083	248124274	205782348	0.829352	7.57824e+06	6.00319e+06	9.19155e+06	5207419	1215	12933	132194	191	144	YES
Hymenoptera	Apidae	Bombus	214	315	GCA_014825975.1	NA	short	short	240538686	1	874667	5.94	99.6	0.3	99.9	0	0.1	100	1699169	0.0071	1688	0	1970000	0.0082	4557960	0.019	7786038	0.0323	299431	0.0013	18120967	0.0753	0.526233	34435253	0.143159	0.526233	240538686	206103433	0.856841	3.22893e+06	3.74359e+06	8.66149e+06	4540002	2111	15847	105724	177	129	YES
Hymenoptera	Formicidae	Pseudomyrmex	175	393	GCA_014839585.1	NA	short	short	196807752	8	14566	4.16	95.5	0.8	96.3	2	1.7	100	3569411	0.0181	1748	0	2374583	0.0121	6439249	0.0327	6793763	0.0345	1812939	0.0093	13113634	0.0666	0.384504	34105327	0.173293	0.384504	196807752	162702425	0.826707	9.28316e+06	6.1757e+06	1.67469e+07	5564823	96970	777456	94463	147	106	YES
Lepidoptera	Sphingidae	Manduca	124	232	GCA_014839805.1	NA	long	oxford	470021481	59	424948	5.63	92.8	5.1	97.9	0.7	1.4	100	29421781	0.0626	19391265	0.0412	7735750	0.0165	15869178	0.0338	4365355	0.0093	31584122	0.0672	55206001	0.1175	0.3375	163573452	0.348013	0.3375	470021481	306448029	0.651987	8.71757e+07	2.29208e+07	4.70198e+07	15356967	37587	474624	363076	163	124	YES
Diptera	Muscidae	Musca	511	NA_quality	GCA_014843735.1	NA	long	oxford	427466556	8.63	71431	4.85	38.8	0.2	39	17.1	43.9	100	12443890	0.0291	82169	0.0002	15599939	0.0365	69878198	0.1635	10088542	0.0236	56880532	0.133	83655111	0.1957	NA_quality	248628381	0.581632	NA_quality	427466556	178838175	0.418368	NA_quality	NA_quality	NA_quality	69398287	28138	451773	419612	247	140	NA_quality
Lepidoptera	Crambidae	Diatraea	120	243	GCA_014843785.1	NA	short	short	453235217	0	14183	4.15	86.5	0.4	86.9	8.8	4.3	100	32878159	0.0725	14901250	0.0329	8523003	0.0188	15368946	0.0339	4311117	0.0095	36864622	0.0812	96634961	0.2133	0.461304	209482058	0.462193	NA_quality	453235217	243753159	0.537807	NA_quality	NA_quality	NA_quality	15216975	140515	11456	756122	139	109	NO
Coleoptera	Curculionidae	Elaeidobius	568	263	GCA_014849505.1	NA	short	short	269635327	0	849	2.93	49.7	0.3	50	31.2	18.8	100	11028677	0.0409	73493	0.0003	687162	0.0026	6662881	0.0247	110524	0.0004	1833709	0.0067	25204647	0.0935	0.55272	45601093	0.169121	NA_quality	269635327	224034234	0.830879	NA_quality	NA_quality	NA_quality	6233373	29291	400217	274814	97	75	NO
Hemiptera	Aphididae	Pentalonia	339	472	GCA_014851325.1	NA	short	short	375222927	12	64073	4.81	94.5	1.8	96.3	0.9	2.8	100	12607213	0.0336	2049	0	3174507	0.0085	44281255	0.118	14572139	0.0389	4392635	0.0117	44674567	0.1191	0.36114	123704365	0.329682	0.36114	375222927	251518562	0.670318	3.49095e+07	8.79024e+06	1.22615e+08	42710003	392	1570860	127199	207	141	YES
Lepidoptera	Crambidae	Cnaphalocrocis	133	241	GCA_014851415.1	NA	long	pacbio	528450314	202	524627	5.72	92.1	2.7	94.8	1.3	3.9	100	60422364	0.1143	48885525	0.0925	13074914	0.0248	10458870	0.0198	4426112	0.0085	24602960	0.0465	82340895	0.1558	0.33717	244211640	0.462128	0.33717	528450314	284238674	0.537872	1.79204e+08	3.87784e+07	3.10196e+07	9052965	5660	1400245	644688	140	100	YES
Diptera	Calliphoridae	Chrysomya	487	95	GCA_014858665.1	NA	short	short	295134161	12	3240	3.51	96.6	0.9	97.5	1.6	0.9	100	6483808	0.0219	1163	0	5058897	0.0171	11167549	0.0378	11123215	0.0376	23657931	0.0802	34202785	0.1159	0.373005	91695348	0.31069	0.373005	295134161	203438813	0.68931	1.73826e+07	1.35626e+07	2.99394e+07	11087945	4502	75102	290596	139	95	YES
Orthoptera	Gryllidae	Acheta	30	NA_quality	GCA_014858955.1	NA	short	short	929173017	8.97	1566	3.19	45.6	0.7	46.3	33.6	20.1	100	15768834	0.017	6383301	0.0069	3972232	0.0043	33718369	0.0363	21580842	0.0232	7245897	0.0078	148615728	0.1599	NA_quality	237285203	0.255372	NA_quality	929173017	691887814	0.744628	NA_quality	NA_quality	NA_quality	32010238	1655314	52817	1244258	127	95	NA_quality
Hymenoptera	Braconidae	Aphidius	163	447	GCA_014905175.1	NA	long	oxford	156944493	6	3929594	6.59	96	2.7	98.7	0.1	1.2	100	588012	0.0038	142868	0.0009	3115335	0.0199	6914341	0.0441	11203288	0.0714	1365720	0.0087	31182988	0.1987	0.572033	54512552	0.347337	0.572033	156944493	102431941	0.652663	1.02793e+06	5.44607e+06	1.20873e+07	2361565	10627	4542149	109910	308	176	YES
Lepidoptera	Bombycidae	Bombyx	122	235	GCA_014905235.1	NA	none	none	460334017	2	12201325	7.09	97.7	1	98.7	0.1	1.2	100	87759182	0.1906	43456846	0.0944	14205199	0.0309	22407374	0.0487	4291064	0.0094	27842754	0.0605	34672268	0.0753	0.147771	234634687	0.509705	0.147771	460334017	225699330	0.490295	5.93885e+08	9.61296e+07	1.51636e+08	22400566	800	6008	205481	180	129	YES
Coleoptera	Scarabaeidae	Trypoxylus	583	285	GCA_014905495.1	NA	long	pacbio	739405423	143	7929129	6.9	98.2	1.1	99.3	0.4	0.3	100	54119846	0.0732	77749	0.0001	83460663	0.1128	180978880	0.2448	4905028	0.0066	21173881	0.0286	135356755	0.1831	0.28195	480072802	0.649269	0.28195	739405423	259332621	0.350731	1.91948e+08	2.96012e+08	6.41882e+08	180640736	213322	124822	504633	279	118	YES
Diptera	Ceratopogonidae	Culicoides	458	162	GCA_900002565.1	NA	none	none	209428516	14	166828	5.22	49.9	48.1	98	0.2	1.8	100	5008516	0.024	39421	0.0002	2115309	0.0101	2290893	0.0109	8772545	0.0419	490743	0.0023	20792322	0.0993	0.526258	39509749	0.188655	0.526258	209428516	169918767	0.811345	9.51723e+06	4.01953e+06	4.35317e+06	2258475	409	32009	115804	192	124	YES
Diptera	Chironomidae	Clunio	371	160	GCA_900005825.1	NA	short	short	85491412	1	154800	5.19	97.9	1	98.9	0.2	0.9	100	213201	0.0025	1087	0	279420	0.0033	169790	0.002	1362475	0.0158	46052	0.0006	1695296	0.0198	0.45	3767321	0.0440667	0.45	85491412	81724091	0.955933	473780	620933	377311	161235	184	8371	10700	163	106	YES
Hemiptera	Pseudococcidae	Trionymus	324	479	GCA_900050545.1	NA	none	none	237582517	0	4604	3.66	87.9	0.8	88.7	5.4	5.9	100	4270917	0.0179	10892	0	2320609	0.0097	18273680	0.077	5503402	0.0231	1229771	0.0051	34705174	0.1461	0.523343	66314445	0.279122	NA_quality	237582517	171268072	0.720878	NA_quality	NA_quality	NA_quality	17885959	43339	344382	238464	161	115	NO
Hemiptera	Pseudococcidae	Ferrisia	328	476	GCA_900060175.1	NA	none	none	304570832	7	24304	4.39	92.9	1.3	94.2	2	3.8	100	8257260	0.0271	1365	0	2302025	0.0075	8234328	0.0271	6857164	0.0225	731484	0.0024	103111149	0.3386	0.796257	129494775	0.425171	0.796257	304570832	175076057	0.574829	1.03701e+07	2.89106e+06	1.03413e+07	7679539	12147	542642	438541	256	158	YES
Hemiptera	Pseudococcidae	Pseudococcus	325	477	GCA_900064475.1	NA	none	none	284990201	10	9727	3.99	90.3	1.2	91.5	4.1	4.4	100	733245	0.0026	1965	0	2763947	0.0097	16901170	0.0593	5324495	0.0186	1129115	0.004	82605192	0.2898	0.754667	109459129	0.38408	0.754667	284990201	175531072	0.61592	971614	3.66247e+06	2.23955e+07	16722661	12210	166299	506490	188	132	YES
Hemiptera	Pseudococcidae	Paracoccus	323	478	GCA_900065295.1	NA	none	none	191208351	12	6250	3.8	92.3	1.4	93.7	2.4	3.9	100	411582	0.0021	2118	0	1121645	0.0059	7841009	0.041	3202096	0.0168	1487054	0.0077	31694250	0.1658	0.692623	45759754	0.239319	0.692623	191208351	145448597	0.760681	594237	1.61942e+06	1.13207e+07	7678833	30831	131345	196953	175	138	YES
Lepidoptera	Nymphalidae	Heliconius	83	174	GCA_900067975.1	NA	none	none	309419125	0	1849	3.27	71.2	0.9	72.1	17.7	10.2	100	6555711	0.0212	293929	0.0009	973333	0.0031	4958436	0.016	6461465	0.0209	57819709	0.1869	3153803	0.0102	0.0393162	80216386	0.259248	NA_quality	309419125	229202739	0.740752	NA_quality	NA_quality	NA_quality	4940195	272	17969	33085	103	79	NO
Lepidoptera	Nymphalidae	Heliconius	100	177	GCA_900068005.1	NA	none	none	381577504	0	1590	3.2	58.2	1.3	59.5	25.8	14.7	100	7030712	0.0184	418588	0.0011	1243378	0.0033	6092626	0.016	7906675	0.0206	76240352	0.1998	4220707	0.011	0.0409169	103153038	0.270333	NA_quality	381577504	278424466	0.729667	NA_quality	NA_quality	NA_quality	6075255	608	16763	47180	98	78	NO
Lepidoptera	Nymphalidae	Heliconius	82	NA_quality	GCA_900068205.1	NA	none	none	306385191	8.49	926	2.97	47.3	0.1	47.4	29.4	23.2	100	5934513	0.0194	493216	0.0016	941424	0.0031	4671705	0.0152	5418928	0.0177	55638713	0.1816	3580552	0.0117	NA_quality	76679051	0.25027	NA_quality	306385191	229706140	0.74973	NA_quality	NA_quality	NA_quality	4654957	434	16314	44244	87	71	NA_quality
Lepidoptera	Nymphalidae	Neruda	89	184	GCA_900068225.1	NA	none	none	337370441	0	1154	3.06	51.6	0.4	52	27.8	20.2	100	7513722	0.0222	980561	0.0029	863268	0.0025	6043117	0.0179	8071346	0.0239	59710039	0.1769	3835059	0.0114	0.0440725	87017112	0.257927	NA_quality	337370441	250353329	0.742073	NA_quality	NA_quality	NA_quality	6028650	250	14217	41017	104	85	NO
Lepidoptera	Nymphalidae	Heliconius	75	170	GCA_900068235.1	NA	none	none	282335894	0	2167	3.34	66.9	0.5	67.4	20.5	12.1	100	5936898	0.021	300430	0.001	930378	0.0033	4706420	0.0167	5316943	0.0189	53641996	0.1901	2878466	0.0102	0.0390504	73711531	0.261077	NA_quality	282335894	208624363	0.738923	NA_quality	NA_quality	NA_quality	4664977	528	40915	31398	96	74	NO
Lepidoptera	Nymphalidae	Heliconius	62	171	GCA_900068275.1	NA	none	none	256832856	0	1278	3.11	56.8	0.4	57.2	26	16.8	100	5144381	0.02	193057	0.0008	898891	0.0035	3812555	0.0148	4716938	0.0184	46266841	0.1801	2785137	0.0109	0.043642	63817800	0.24848	NA_quality	256832856	193015056	0.75152	NA_quality	NA_quality	NA_quality	3799146	507	12902	34917	86	67	NO
Lepidoptera	Nymphalidae	Heliconius	43	NA_quality	GCA_900068305.1	NA	none	none	146293788	8.17	546	2.74	24.8	0.2	25	29.1	45.9	100	3659175	0.025	262230	0.0018	550068	0.0037	1757363	0.012	1591878	0.0108	21257811	0.1454	1138081	0.0078	NA_quality	30216606	0.206547	NA_quality	146293788	116077182	0.793453	NA_quality	NA_quality	NA_quality	1743150	313	13900	14641	85	71	NA_quality
Lepidoptera	Nymphalidae	Heliconius	65	172	GCA_900068315.1	NA	none	none	264760125	0	1162	3.07	52.8	0.1	52.9	28.7	18.4	100	5186690	0.0196	351416	0.0013	902531	0.0034	4055384	0.0153	4858205	0.0183	48873625	0.1846	2712733	0.0102	0.0405245	66940584	0.252835	NA_quality	264760125	197819541	0.747165	NA_quality	NA_quality	NA_quality	4037689	748	16947	31566	91	69	NO
Lepidoptera	Nymphalidae	Laparus	64	NA_quality	GCA_900068325.1	NA	none	none	261728519	8.42	1215	3.08	39.7	0.3	40	34.5	25.5	100	9133251	0.0349	983761	0.0038	1228121	0.0047	5782253	0.0221	5463296	0.0208	46568542	0.1779	4275590	0.0164	NA_quality	73434814	0.280576	NA_quality	261728519	188293705	0.719424	NA_quality	NA_quality	NA_quality	5765636	818	15799	44225	103	79	NA_quality
Lepidoptera	Nymphalidae	Laparus	58	NA_quality	GCA_900068335.1	NA	none	none	241555716	8.38	861	2.94	32.3	0.2	32.5	31.5	36	100	9626988	0.0399	1299976	0.0054	1295319	0.0054	4962518	0.0206	3384368	0.0139	39050817	0.1618	3096468	0.0128	NA_quality	62716454	0.259636	NA_quality	241555716	178839262	0.740364	NA_quality	NA_quality	NA_quality	4945933	487	16098	37695	88	69	NA_quality
Lepidoptera	Nymphalidae	Laparus	46	NA_quality	GCA_900068345.1	NA	none	none	208688959	8.32	645	2.81	24.7	0.2	24.9	29.9	45.2	100	8506681	0.0407	1179703	0.0057	962745	0.0046	4041899	0.0193	2377300	0.0114	33221466	0.1592	2107192	0.0101	NA_quality	52396986	0.251077	NA_quality	208688959	156291973	0.748923	NA_quality	NA_quality	NA_quality	4027562	656	13681	23993	92	75	NA_quality
Lepidoptera	Nymphalidae	Heliconius	96	175	GCA_900068365.1	NA	none	none	364783738	0	1512	3.18	60	1	61	24.8	14.2	100	7033018	0.0193	730034	0.002	1058845	0.0029	5683061	0.0156	7523824	0.0205	74144598	0.2032	2861628	0.0078	0.0288951	99035008	0.27149	NA_quality	364783738	265748730	0.72851	NA_quality	NA_quality	NA_quality	5665136	788	17137	29819	102	74	NO
Lepidoptera	Nymphalidae	Heliconius	95	178	GCA_900068385.1	NA	none	none	362124033	0	1246	3.1	49.5	0.4	49.9	30.4	19.7	100	6481906	0.0179	429729	0.0012	1135174	0.0032	5543266	0.0153	7611744	0.021	71987019	0.1987	4085153	0.0113	0.0419964	97273991	0.268621	NA_quality	362124033	264850042	0.731379	NA_quality	NA_quality	NA_quality	5511179	16043	16044	50924	92	75	NO
Lepidoptera	Nymphalidae	Heliconius	80	179	GCA_900068425.1	NA	none	none	295736468	0	1502	3.18	63.7	0.5	64.2	22.3	13.5	100	5634643	0.0191	389154	0.0013	987339	0.0033	4689302	0.0158	6211217	0.0209	55037473	0.1861	2856795	0.0097	0.0376856	75805923	0.256329	NA_quality	295736468	219930545	0.743671	NA_quality	NA_quality	NA_quality	4673824	237	15241	29784	102	80	NO
Lepidoptera	Nymphalidae	Heliconius	48	NA_quality	GCA_900068455.1	NA	none	none	212767244	8.33	789	2.9	31.7	0.1	31.8	32.3	35.9	100	6517743	0.0306	543705	0.0025	740056	0.0035	3970073	0.0187	2806538	0.0132	34948127	0.1643	2898304	0.0136	NA_quality	52424546	0.246394	NA_quality	212767244	160342698	0.753606	NA_quality	NA_quality	NA_quality	3951743	585	17745	39422	80	67	NA_quality
Lepidoptera	Nymphalidae	Heliconius	47	NA_quality	GCA_900068475.1	NA	none	none	210868349	8.32	807	2.91	28.7	0.1	28.8	31.2	40	100	6014675	0.0285	699640	0.0033	1049190	0.005	3863336	0.0183	3146628	0.0149	32601167	0.1547	2411930	0.0114	NA_quality	49786566	0.236103	NA_quality	210868349	161081783	0.763897	NA_quality	NA_quality	NA_quality	3845664	420	17252	29120	88	73	NA_quality
Lepidoptera	Nymphalidae	Heliconius	71	168	GCA_900068495.1	NA	none	none	274242794	0	1102	3.04	56.9	0.5	57.4	26.3	16.3	100	5600675	0.0204	525161	0.0019	958974	0.0035	4059736	0.0148	4621955	0.0169	49010554	0.1787	2483796	0.009	0.0369278	67260851	0.24526	NA_quality	274242794	206981943	0.75474	NA_quality	NA_quality	NA_quality	4045317	216	14203	28473	91	69	NO
Lepidoptera	Nymphalidae	Heliconius	85	167	GCA_900068505.1	NA	none	none	318072104	0	1882	3.27	69.1	0.7	69.8	19.7	10.5	100	6434058	0.0202	313926	0.001	1116829	0.0035	5312939	0.0167	6504342	0.0204	62401245	0.1961	3400126	0.0107	0.0397752	85483465	0.268755	NA_quality	318072104	232588639	0.731245	NA_quality	NA_quality	NA_quality	5293579	3645	15715	36266	100	78	NO
Lepidoptera	Nymphalidae	Heliconius	51	NA_quality	GCA_900068515.1	NA	none	none	221669006	8.35	752	2.88	37	0.2	37.2	29.9	32.9	100	4874364	0.022	505454	0.0022	705196	0.0031	3183115	0.0144	3007846	0.0135	37570715	0.1695	1830660	0.0082	NA_quality	51677350	0.233128	NA_quality	221669006	169991656	0.766872	NA_quality	NA_quality	NA_quality	3173444	476	9195	25455	78	65	NA_quality
Lepidoptera	Nymphalidae	Heliconius	54	NA_quality	GCA_900068535.1	NA	none	none	228013940	8.36	876	2.94	42.1	0.2	42.3	28.4	29.3	100	4743422	0.0208	395904	0.0018	915609	0.004	3398727	0.0149	3502552	0.0153	41709134	0.183	1775544	0.0078	NA_quality	56440892	0.247533	NA_quality	228013940	171573048	0.752467	NA_quality	NA_quality	NA_quality	3384723	152	13852	23415	80	63	NA_quality
Lepidoptera	Nymphalidae	Heliconius	49	NA_quality	GCA_900068555.1	NA	none	none	218066150	8.34	699	2.84	38	0.2	38.2	30.9	30.9	100	4252521	0.0195	621497	0.0028	787079	0.0036	3319888	0.0152	2967320	0.0135	33709971	0.1544	1902586	0.0087	NA_quality	47560862	0.218103	NA_quality	218066150	170505288	0.781897	NA_quality	NA_quality	NA_quality	3305722	128	14038	27123	77	61	NA_quality
Lepidoptera	Nymphalidae	Heliconius	56	NA_quality	GCA_900068635.1	NA	none	none	233711095	8.37	915	2.96	37.2	1.2	38.4	26.5	35.1	100	4024620	0.0172	521310	0.0023	731794	0.0031	2922516	0.0125	2912759	0.0124	28364129	0.1214	2178523	0.0093	NA_quality	41655651	0.178236	NA_quality	233711095	192055444	0.821764	NA_quality	NA_quality	NA_quality	2909228	323	12965	22085	103	71	NA_quality
Lepidoptera	Nymphalidae	Heliconius	57	NA_quality	GCA_900068645.1	NA	none	none	240751188	8.38	816	2.91	45.1	0.2	45.3	28.9	25.8	100	4310713	0.0179	466593	0.0019	833021	0.0035	3327382	0.0138	3680015	0.0152	36246959	0.1506	2403025	0.01	NA_quality	51267708	0.212949	NA_quality	240751188	189483480	0.787051	NA_quality	NA_quality	NA_quality	3314961	302	12119	29343	88	76	NA_quality
Lepidoptera	Nymphalidae	Heliconius	87	166	GCA_900068665.1	NA	none	none	322345282	0	1927	3.28	68.8	1.2	70	19.3	10.7	100	6571900	0.0204	339799	0.0011	1095284	0.0034	4862764	0.0151	6764601	0.021	62069278	0.1924	3383567	0.0105	0.0397659	85087193	0.263963	NA_quality	322345282	237258089	0.736037	NA_quality	NA_quality	NA_quality	4849420	710	12634	37412	97	78	NO
Lepidoptera	Nymphalidae	Heliconius	67	169	GCA_900068675.1	NA	none	none	267031756	0	1132	3.05	51.1	1	52.1	27.5	20.4	100	4741852	0.0178	388182	0.0015	843811	0.0032	3815143	0.0143	4424171	0.0165	41766204	0.1564	2259383	0.0085	0.0387952	58238746	0.218097	NA_quality	267031756	208793010	0.781903	NA_quality	NA_quality	NA_quality	3789393	11150	14600	26787	91	71	NO
Lepidoptera	Nymphalidae	Heliconius	50	NA_quality	GCA_900068695.1	NA	none	none	225751348	8.35	808	2.91	40.2	0.4	40.6	30.5	28.9	100	4479178	0.0199	525634	0.0023	803838	0.0036	3098692	0.0137	2932467	0.0129	34879923	0.1545	1773939	0.0079	NA_quality	48493671	0.21481	NA_quality	225751348	177257677	0.78519	NA_quality	NA_quality	NA_quality	3088212	267	10213	22786	83	66	NA_quality
Lepidoptera	Nymphalidae	Heliconius	74	173	GCA_900068735.1	NA	none	none	279264790	0	1241	3.09	62.3	0.4	62.7	20.2	17.1	100	5188574	0.0186	479681	0.0017	815355	0.0029	3674211	0.0132	4426535	0.0158	45533011	0.1632	2492065	0.009	0.0398033	62609432	0.224194	NA_quality	279264790	216655358	0.775806	NA_quality	NA_quality	NA_quality	3658492	512	15207	25256	102	79	NO
Lepidoptera	Nymphalidae	Heliconius	94	NA_quality	GCA_900068815.1	NA	none	none	365010054	8.56	676	2.83	41.5	0.3	41.8	32.5	25.7	100	13533038	0.037	1549437	0.0043	1204802	0.0033	9454885	0.026	6507323	0.0178	71860995	0.1969	6075863	0.0166	NA_quality	110186343	0.301872	NA_quality	365010054	254823711	0.698128	NA_quality	NA_quality	NA_quality	9428126	257	26502	68127	94	74	NA_quality
Lepidoptera	Nymphalidae	Heliconius	45	NA_quality	GCA_900068825.1	NA	none	none	198611823	8.3	781	2.89	29.6	0.2	29.8	28.1	42.1	100	6803142	0.0343	568898	0.0029	910661	0.0046	3578855	0.018	2434031	0.0123	32332933	0.1628	2092621	0.0106	NA_quality	48721141	0.245308	NA_quality	198611823	149890682	0.754692	NA_quality	NA_quality	NA_quality	3565318	389	13148	25712	87	73	NA_quality
Lepidoptera	Pieridae	Leptidea	141	206	GCA_900199445.1	NA	none	none	643059204	0	29811	4.47	83.2	0.9	84.1	8.6	7.3	100	142123591	0.221	24583955	0.0382	6983396	0.0108	36212121	0.0563	4432886	0.0068	39000271	0.0607	112346539	0.1747	0.307224	365682759	0.568661	NA_quality	643059204	277376445	0.431339	NA_quality	NA_quality	NA_quality	33187038	2804073	221010	794678	150	114	NO
Lepidoptera	Nymphalidae	Bicyclus	126	192	GCA_900239965.1	NA	none	none	475399557	125	78697	4.9	97.1	0.7	97.8	1	1.2	100	61711665	0.1298	23122473	0.0486	4005298	0.0084	10667029	0.0225	5268084	0.0111	57830348	0.1217	69079365	0.1453	0.298162	231684262	0.487346	0.298162	475399557	243715295	0.512654	2.06974e+08	1.34333e+07	3.5776e+07	10562726	42737	61566	545054	136	103	YES
Diptera	Drosophilidae	Drosophila	384	49	GCA_900245975.1	NA	none	none	140632981	5	294367	5.47	98.7	0.6	99.3	0.3	0.4	100	3080017	0.0219	1213	0	2004787	0.0142	1599717	0.0114	6240297	0.0444	4470187	0.0317	14660599	0.1043	0.457332	32056817	0.227913	0.457332	140653667	108596850	0.772087	6.73475e+06	4.38366e+06	3.49794e+06	1358992	336	240389	37021	416	173	YES
Orthoptera	Acrididae	Xenocatantops	29	525	GCA_900249655.1	NA	none	none	41642132	0	1799	3.26	74.5	11	85.5	5.9	8.6	100	814903	0.0196	105722	0.0026	348277	0.0084	749367	0.018	743674	0.0177	372132	0.0088	1301337	0.0312	0.293397	4435412	0.106513	NA_quality	41642132	37206720	0.893487	NA_quality	NA_quality	NA_quality	728436	0	20931	3836	354	175	NO
Diptera	Drosophilidae	Drosophila	406	55	GCA_900465395.1	NA	none	none	160223033	5	22571	4.35	95.5	1.3	96.8	1.9	1.3	100	2778309	0.0174	3121	0	4635245	0.0289	848682	0.0053	9993085	0.0624	9962230	0.0622	5014342	0.0313	0.150875	33235014	0.20743	0.150875	160223033	126988019	0.79257	1.84146e+07	3.07224e+07	5.62506e+06	803470	13115	32097	43382	130	88	YES
Hymenoptera	Cynipidae	Andricus	315	NA_quality	GCA_900474205.1	NA	none	none	1713399768	9.23	635	2.8	27	0.5	27.5	38.8	33.7	100	75058118	0.0438	1072650	0.0006	25679502	0.015	110782890	0.0647	20427589	0.012	142871895	0.0833	660359714	0.3854	NA_quality	1036252358	0.604793	NA_quality	1713399768	677147410	0.395207	NA_quality	NA_quality	NA_quality	106767353	731345	3284192	5069164	145	110	NA_quality
Hymenoptera	Cynipidae	Andricus	316	NA_quality	GCA_900474215.1	NA	none	none	1869313883	9.27	980	2.99	31.5	0.4	31.9	39.4	28.7	100	104474943	0.0559	1508632	0.0008	40739460	0.0218	123129325	0.0659	27621522	0.0148	155355896	0.0831	729854139	0.3905	NA_quality	1182683917	0.632683	NA_quality	1869313883	686629966	0.367317	NA_quality	NA_quality	NA_quality	116458761	762658	5907906	4958400	163	117	NA_quality
Hymenoptera	Pteromalidae	Cecidostiba	257	418	GCA_900474235.1	NA	none	none	287222439	3	3407	3.53	92	1	93	3.4	3.6	100	9156606	0.0319	170889	0.0006	23286165	0.0811	16114793	0.0561	8824101	0.0307	3821099	0.0135	32721751	0.1139	0.347751	94095404	0.327605	0.347751	287222439	193127035	0.672395	2.63309e+07	6.69622e+07	4.63401e+07	5720057	412092	9982644	202362	172	126	YES
Hymenoptera	Cynipidae	Andricus	317	NA_quality	GCA_900474265.1	NA	none	none	1937566174	9.29	977	2.99	16.5	0.9	17.4	38.1	44.5	100	75611226	0.039	2215762	0.0011	37481712	0.0194	120527812	0.0622	32700879	0.0168	129938619	0.0669	799568271	0.4127	NA_quality	1198044281	0.618324	NA_quality	1937566174	739521893	0.381676	NA_quality	NA_quality	NA_quality	113709446	718868	6099498	5947077	150	109	NA_quality
Hymenoptera	Cynipidae	Synergus	193	435	GCA_900474275.1	NA	none	none	226414463	17	55627	4.75	96.1	1.5	97.6	1.7	0.7	100	727283	0.0032	1786	0	5226006	0.0231	23838827	0.1053	3978224	0.0175	1398758	0.0062	39775169	0.1757	0.530717	74946053	0.331013	0.530717	226414463	151468410	0.668987	1.37038e+06	9.84706e+06	4.49181e+07	22631721	95635	1111471	214961	201	137	YES
Hymenoptera	Pteromalidae	Cecidostiba	171	417	GCA_900474305.1	NA	none	none	185537488	1	87218	4.94	93	1.1	94.1	0.5	5.4	100	1727414	0.0093	17031	0.0001	3005914	0.0162	2393046	0.0129	4351873	0.0234	673375	0.0037	5629792	0.0304	0.316308	17798445	0.0959291	0.316308	185537488	167739043	0.904071	5.46118e+06	9.50312e+06	7.56555e+06	1188713	167690	1036643	43762	134	99	YES
Hymenoptera	Torymidae	Torymus	300	423	GCA_900474315.1	NA	none	none	410910949	7	9699	3.99	91.7	1.7	93.4	3.3	3.3	100	15188638	0.0369	486726	0.0012	16616547	0.0404	10599548	0.0258	8512188	0.0207	3608774	0.0089	83708659	0.2037	0.603431	138721080	0.337594	0.603431	410910949	272189869	0.662406	2.51704e+07	2.75368e+07	1.75655e+07	6680804	1075650	2843094	590145	152	104	YES
Hymenoptera	Cynipidae	Synergus	211	436	GCA_900474325.1	NA	none	none	235334141	21	42371	4.63	96	0.9	96.9	1.6	1.5	100	962957	0.0041	123705	0.0005	5293203	0.0225	26878642	0.1142	4054409	0.0171	1753827	0.0074	42960984	0.1826	0.523737	82027727	0.348559	0.523737	235334141	153306414	0.651441	1.83863e+06	1.01066e+07	5.13208e+07	25471987	133450	1273205	232889	202	136	YES
Hymenoptera	Ormyridae	Ormyrus	232	428	GCA_900474335.1	NA	none	none	259885974	2	22971	4.36	94.3	1.4	95.7	2	2.3	100	4462549	0.0172	219841	0.0008	5091739	0.0196	4295695	0.0165	6150317	0.0236	1230680	0.0047	18799445	0.0723	0.467064	40250266	0.154877	0.467064	259885974	219635708	0.845123	9.55447e+06	1.09016e+07	9.19723e+06	3334348	158278	803069	128447	153	108	YES
Hymenoptera	Torymidae	Torymus	290	424	GCA_900474355.1	NA	none	none	363976237	0	4982	3.7	83.6	0.9	84.5	9.7	5.8	100	10597851	0.0291	352721	0.001	13477225	0.0371	9010504	0.0247	7961860	0.0219	2131094	0.0059	59201228	0.1627	0.576266	102732483	0.282251	NA_quality	363976237	261243754	0.717749	NA_quality	NA_quality	NA_quality	5531881	1253355	2225268	409190	156	113	NO
Hymenoptera	Ormyridae	Ormyrus	240	427	GCA_900474385.1	NA	none	none	266814119	3	30505	4.48	94.9	1.2	96.1	1.8	2.1	100	5397680	0.0202	257764	0.001	5774915	0.0216	5452781	0.0205	6495723	0.0242	2025149	0.0077	29227055	0.1095	0.53499	54631067	0.204753	0.53499	266814119	212183052	0.795247	1.00893e+07	1.07944e+07	1.01923e+07	3921574	352150	1179057	183552	169	123	YES
Hymenoptera	Eurytomidae	Eurytoma	281	426	GCA_900475205.1	NA	none	none	321460311	3	12988	4.11	92.2	1.1	93.3	3.1	3.6	100	5508609	0.0172	125756	0.0004	9344020	0.029	8513031	0.0264	6845434	0.0213	2254158	0.007	42917599	0.1335	0.56838	75508607	0.234892	0.56838	321460311	245951704	0.765108	9.69177e+06	1.64397e+07	1.49777e+07	6506722	632205	1374104	358193	127	90	YES
Hymenoptera	Eupelmidae	Eupelmus	276	420	GCA_900480025.1	NA	none	none	314961079	4	28345	4.45	93.8	1	94.8	2.6	2.6	100	5201553	0.0165	212676	0.0007	9891885	0.0314	5408565	0.0172	8178696	0.026	2339481	0.0074	32551956	0.1033	0.51034	63784812	0.202516	0.51034	314961079	251176267	0.797484	1.01923e+07	1.93829e+07	1.0598e+07	3339209	651179	1418177	217888	158	114	YES
Hymenoptera	Eupelmidae	Eupelmus	295	419	GCA_900480035.1	NA	none	none	376747980	5	17904	4.25	94	1	95	2.3	2.7	100	8809283	0.0234	450595	0.0012	14206410	0.0377	9527970	0.0253	14145195	0.0375	3671206	0.0097	58242131	0.1545	0.534073	109052790	0.289458	0.534073	376747980	267695190	0.710542	1.64945e+07	2.66001e+07	1.78402e+07	6669776	860190	1998004	415061	149	99	YES
Hymenoptera	Eurytomidae	Eurytoma	275	425	GCA_900480045.1	NA	none	none	314665288	4	34678	4.54	93	1.2	94.2	2.9	2.9	100	6843085	0.0217	76991	0.0002	10592929	0.0337	9813917	0.0312	6817707	0.0217	2072787	0.0066	49851610	0.1584	0.579205	86069026	0.273526	0.579205	314665288	228596262	0.726474	1.18146e+07	1.82887e+07	1.69438e+07	6691034	426960	2695923	422439	125	91	YES
Hymenoptera	Megastigmidae	Megastigmus	306	422	GCA_900490015.1	NA	none	none	577887951	35	7394	3.87	92.3	2.3	94.6	2.5	2.9	100	33604746	0.0581	1146124	0.002	38733256	0.067	56048972	0.097	22057241	0.0382	5729450	0.0099	113586951	0.1965	0.419284	270906740	0.468788	0.419284	577887951	306981211	0.531212	8.01479e+07	9.23795e+07	1.33678e+08	39589045	513524	15946403	538201	226	149	YES
Hymenoptera	Megastigmidae	Megastigmus	307	421	GCA_900490025.1	NA	none	none	589959111	25	12960	4.11	92.8	2.4	95.2	2	2.8	100	32387907	0.0549	1047815	0.0018	39957089	0.0678	49748097	0.0843	15083238	0.0256	10446165	0.0177	135228655	0.2292	0.476327	283898966	0.481218	0.476327	589959111	306060145	0.518782	6.79952e+07	8.38859e+07	1.04441e+08	32990026	796229	15961842	560503	256	167	YES
Hymenoptera	Cynipidae	Pseudoneuroterus	318	NA_quality	GCA_900490055.1	NA	none	none	2060851172	9.31	536	2.73	40.8	1	41.8	33.3	24.9	100	236395921	0.1147	3145123	0.0015	38420091	0.0186	213314900	0.1035	16805188	0.0081	45540110	0.0221	746269479	0.3622	NA_quality	1299890812	0.630754	NA_quality	2060851172	760960360	0.369246	NA_quality	NA_quality	NA_quality	205837360	462196	7015344	5706868	145	115	NA_quality
Hymenoptera	Cynipidae	Neuroterus	319	NA_quality	GCA_900490065.1	NA	none	none	2569683019	9.41	1019	3.01	28.7	0.3	29	37	34	100	111199734	0.0433	1051892	0.0004	53738778	0.0209	147431295	0.0573	21384730	0.0083	166724421	0.065	748155875	0.2911	NA_quality	1249686725	0.486319	NA_quality	2569683019	1319996294	0.513681	NA_quality	NA_quality	NA_quality	138879897	764573	7786825	4812343	167	130	NA_quality
Lepidoptera	Nymphalidae	Pararge	130	191	GCA_900499025.1	NA	none	none	501694711	0	11442	4.06	86.5	1.5	88	7.8	4.2	100	62100407	0.1237	37330620	0.0744	1157712	0.0023	4912925	0.0098	5072664	0.0101	34941547	0.0698	60052663	0.1197	0.29213	205568538	0.409748	NA_quality	501694711	296126173	0.590252	NA_quality	NA_quality	NA_quality	4892793	2599	17533	564400	114	90	NO
Coleoptera	Chrysomelidae	Callosobruchus	591	270	GCA_900659725.1	NA	none	none	1007816681	0	212245	5.33	83.5	4	87.5	3.9	8.6	100	194841001	0.1933	2597613	0.0026	25325427	0.0251	159788068	0.1585	8049523	0.008	30622936	0.0304	321289963	0.3188	0.432705	742514531	0.736756	NA_quality	1007816681	265302150	0.263244	NA_quality	NA_quality	NA_quality	155617599	180014	3990455	1280247	267	147	NO
Phasmatodea	Timematidae	Timema	21	506	GCA_901482245.1	NA	none	none	1123070144	0	25777	4.41	87.1	0.4	87.5	8	4.5	100	54370220	0.0484	53748929	0.0479	18324070	0.0163	85023478	0.0757	14629120	0.013	41237310	0.0367	365676039	0.3256	0.577679	633009166	0.563642	NA_quality	1123070144	490060978	0.436358	NA_quality	NA_quality	NA_quality	75294730	168157	9560591	2309356	172	127	NO
Hymenoptera	Formicidae	Crematogaster	279	373	GCA_901521435.1	NA	none	none	326199551	21	255727	5.41	96.6	1.6	98.2	0.3	1.5	100	14087600	0.0432	116527	0.0004	15123504	0.0464	40706038	0.1248	8366335	0.0256	7486168	0.0229	30010283	0.092	0.25894	115896455	0.355293	0.25894	326199551	210303096	0.644707	5.44048e+07	5.84053e+07	1.57202e+08	37313617	605318	2787103	145886	220	133	YES
Phasmatodea	Timematidae	Timema	23	505	GCA_902141375.1	NA	none	none	1137318704	0	12322	4.09	75	0.5	75.5	15	9.5	100	55461814	0.0488	41498773	0.0365	18181756	0.016	91842576	0.0807	13928318	0.0123	48499956	0.0425	369482076	0.3248	0.578314	638895269	0.561756	NA_quality	1137318704	498423435	0.438244	NA_quality	NA_quality	NA_quality	83060372	799	8781405	2487916	161	122	NO
Phasmatodea	Timematidae	Timema	25	508	GCA_902141385.1	NA	none	none	1220418541	0	17799	4.25	79.9	0.5	80.4	10.8	8.8	100	57856660	0.0474	52433946	0.043	21447366	0.0176	108522020	0.0889	14872272	0.0122	32481672	0.0265	407132349	0.3336	0.586016	694746285	0.569269	NA_quality	1220418541	525672256	0.430731	NA_quality	NA_quality	NA_quality	98802034	1031	9718955	2684275	166	126	NO
Phasmatodea	Timematidae	Timema	22	507	GCA_902151425.1	NA	none	none	1153163518	0	26252	4.42	87	0.4	87.4	8.3	4.3	100	57888387	0.0502	64772474	0.0562	20795175	0.0181	108427028	0.094	13640367	0.0118	25121026	0.0217	369727284	0.3206	0.559878	660371741	0.572661	NA_quality	1153163518	492791777	0.427339	NA_quality	NA_quality	NA_quality	97280235	963	11145830	2325811	174	129	NO
Phasmatodea	Timematidae	Timema	24	510	GCA_902151435.1	NA	none	none	1177599484	0	20744	4.32	86.9	0.7	87.6	6.6	5.8	100	55317862	0.0469	48940984	0.0416	18487384	0.0157	107679946	0.0915	14662678	0.0124	43566189	0.037	373198596	0.3169	0.563869	661853639	0.562036	NA_quality	1177599484	515745845	0.437964	NA_quality	NA_quality	NA_quality	96126572	107970	11445404	2540082	160	119	NO
Phasmatodea	Timematidae	Timema	20	509	GCA_902151445.1	NA	none	none	1098921974	172	34552	4.54	90.9	0.5	91.4	4.4	4.2	100	55790519	0.0507	54077649	0.0492	17620166	0.0161	103876350	0.0945	13816363	0.0125	35349733	0.0321	347331591	0.316	0.553197	627862371	0.571344	0.553197	1098921974	471059603	0.428656	1.00851e+08	3.18515e+07	1.87775e+08	92248582	425	11627343	2190270	175	131	YES
Phasmatodea	Timematidae	Timema	19	512	GCA_902151455.1	NA	none	none	1108645000	0	21089	4.32	87.4	0.2	87.6	6.5	5.9	100	54123760	0.0488	41499934	0.0374	15206427	0.0137	100295254	0.0904	14503263	0.0131	42361084	0.0381	363954319	0.3283	0.575928	631944041	0.570015	NA_quality	1108645000	476700959	0.429985	NA_quality	NA_quality	NA_quality	94064277	779	6230198	2369562	169	126	NO
Phasmatodea	Timematidae	Timema	18	511	GCA_902151465.1	NA	none	none	1093399193	152	28042	4.45	89.8	0.1	89.9	5.8	4.3	100	52791089	0.0482	35625593	0.0326	16271459	0.0148	104273546	0.0954	13548908	0.0123	23661351	0.0217	374669376	0.3427	0.603487	620841322	0.567808	0.603487	1093399193	472557871	0.432192	8.74768e+07	2.69624e+07	1.72785e+08	97026262	711	7246573	2326866	178	135	YES
Phasmatodea	Timematidae	Timema	17	514	GCA_902151475.1	NA	none	none	1105092765	0	3875	3.59	50.5	0.3	50.8	28.7	20.5	100	52649909	0.0477	34704974	0.0314	10018270	0.0091	90555479	0.082	15278049	0.0138	37306608	0.0338	380663562	0.3445	0.61281	621176851	0.562104	NA_quality	1105092765	483915914	0.437896	NA_quality	NA_quality	NA_quality	85570641	1049	4983789	2734421	151	117	NO
Phasmatodea	Timematidae	Timema	16	513	GCA_902155825.1	NA	none	none	1049658498	168	33483	4.52	90.7	0.3	91	5.3	3.7	100	53517925	0.0509	34227832	0.0326	18060754	0.0172	95497932	0.091	14624635	0.0139	31486381	0.03	345613564	0.3293	0.582794	593029023	0.564973	0.582794	1049658498	456629475	0.435027	9.183e+07	3.099e+07	1.63862e+08	89890282	879	5606771	2169849	174	132	YES
Thysanoptera	Thripidae	Aptinothrips	8	504	GCA_902196195.1	NA	none	none	339926289	20	4094	3.61	94.7	0.4	95.1	2.9	2	100	863145	0.0025	507452	0.0015	1736174	0.0051	6525504	0.0192	17143228	0.0504	777604	0.0024	81089994	0.2386	0.746389	108643101	0.319608	0.746389	339926289	231283188	0.680392	1.15643e+06	2.3261e+06	8.74277e+06	5954129	291	571084	602638	140	110	YES
Hemiptera	Lachnidae	Cinara	341	475	GCA_902439185.1	NA	none	none	396042769	13	282647	5.45	95.1	1.9	97	0.7	2.3	100	10589463	0.0268	34156	0.0001	906134	0.0023	44742989	0.113	13428293	0.0339	4447901	0.0112	73629022	0.1859	0.498241	147777958	0.373136	0.498241	396042769	248264811	0.626864	2.12537e+07	1.81867e+06	8.98019e+07	44055241	263	687485	336348	169	132	YES
Lepidoptera	Plutellidae	Plutella	88	253	GCA_902505585.1	NA	none	none	330364023	94	3011633	6.48	97.1	0.7	97.8	0.7	1.5	100	37965341	0.1149	9275075	0.0281	14925341	0.0452	15063362	0.0456	3720690	0.0113	12431527	0.0376	47361827	0.1434	0.336512	140743163	0.426024	0.336512	330364023	189620860	0.573976	1.1282e+08	4.4353e+07	4.47632e+07	14181958	576	880828	294367	170	105	YES
Coleoptera	Chrysomelidae	Ophraella	586	267	GCA_902651945.1	NA	none	none	774411302	197	195463	5.29	87	8.5	95.5	1.8	2.7	100	108310270	0.1398	37943	0	46933490	0.0606	145523704	0.1879	7304756	0.0093	31567606	0.0407	187248804	0.2418	0.35536	526926573	0.680422	0.35536	774411302	247484729	0.319578	3.0479e+08	1.32073e+08	4.0951e+08	126130619	16668311	2724774	858097	231	132	YES
Coleoptera	Scarabaeidae	Oryctes	572	283	GCA_902654985.1	NA	none	none	388628564	36	171752	5.23	95.6	0.9	96.5	0.4	3.1	100	24885945	0.064	150325	0.0004	2310995	0.0059	62332677	0.1604	2599359	0.0067	9356362	0.0241	49989482	0.1286	0.329691	151625145	0.390154	0.329691	388628564	237003419	0.609846	7.54826e+07	7.00957e+06	1.89064e+08	61829121	460944	42612	351268	152	112	YES
Coleoptera	Scarabaeidae	Marronus	573	284	GCA_902655005.1	NA	none	none	406936680	36	107748	5.03	94.4	1.8	96.2	1	2.8	100	26036910	0.064	275771	0.0007	2674593	0.0066	60368900	0.1483	2438090	0.0059	9061334	0.0222	52725067	0.1296	0.343305	153580665	0.377407	0.343305	406936680	253356015	0.622593	7.58418e+07	7.79071e+06	1.75846e+08	59750389	550136	68375	374151	151	113	YES
Hymenoptera	Trichogrammatidae	Trichogramma	186	433	GCA_902732785.1	NA	none	none	213671129	5	27346	4.44	93.9	3.3	97.2	1	1.8	100	6962400	0.0326	21417	0.0001	3913874	0.0183	4397774	0.0206	6487934	0.0304	1480951	0.0069	34644518	0.1621	0.598259	57908868	0.271019	0.598259	213671129	155762261	0.728981	1.16378e+07	6.5421e+06	7.35095e+06	3332921	530389	534464	229629	160	116	YES
Lepidoptera	Nymphalidae	Aphantopus	109	193	GCA_902806685.1	NA	none	none	408137179	149	2012761	6.3	97.3	0.9	98.2	0.4	1.4	100	56159709	0.1376	13457899	0.033	12699086	0.0311	10824398	0.0265	4695429	0.0115	70285025	0.1723	56970937	0.1396	0.2531	225092483	0.551512	0.2531	408137179	183044696	0.448488	2.21887e+08	5.01742e+07	4.27673e+07	10327118	71042	426238	448504	138	103	YES
Hemiptera	Miridae	Nesidiocoris	337	490	GCA_902806785.1	NA	none	none	355120802	0	13359	4.13	66.6	21.5	88.1	5.4	6.5	100	7517073	0.0212	55692	0.0002	8414386	0.0237	9095757	0.0257	5659777	0.0159	1622536	0.0045	77975165	0.2195	0.706678	110340386	0.310712	NA_quality	355120802	244780416	0.689288	NA_quality	NA_quality	NA_quality	8334767	10551	750439	459500	187	109	NO
Hymenoptera	Trichogrammatidae	Trichogramma	206	432	GCA_902806795.1	NA	none	none	235386796	14	556663	5.75	93.2	2.7	95.9	1	3.1	100	7688884	0.0327	64978	0.0003	9936260	0.0422	9398999	0.0399	6504937	0.0277	1176975	0.0049	36430826	0.1548	0.511656	71201859	0.302489	0.511656	235386796	164184937	0.697511	1.50275e+07	1.94198e+07	1.83698e+07	7528345	661217	1209437	131999	296	154	YES
Lepidoptera	Erebidae	Arctia	136	229	GCA_902825455.1	NA	none	none	577993050	143	4251345	6.63	95.1	0.7	95.8	0.4	3.8	100	119555099	0.2068	12433765	0.0215	11339261	0.0196	22128907	0.0383	6262005	0.0108	38939767	0.0675	49677912	0.086	0.190822	260336716	0.450415	0.190822	577993050	317656334	0.549585	6.26528e+08	5.94233e+07	1.15966e+08	22035211	2631	91065	341366	158	110	YES
Ephemeroptera	Baetidae	Cloeon	367	530	GCA_902829235.1	NA	none	none	180286980	5	434950	5.64	95.4	2.3	97.7	0.4	1.9	100	1277042	0.0071	680	0	516740	0.0029	237974	0.0013	1638114	0.009	278304	0.0016	25102335	0.1392	0.864073	29051189	0.161139	0.864073	180286980	151235791	0.838861	1.47793e+06	598028	275410	208143	273	29558	103545	253	144	YES
Hymenoptera	Agaonidae	Pleistodontes	304	430	GCA_903653215.1	NA	none	none	510361104	6	7742	3.89	94.1	0.2	94.3	2.9	2.8	100	6157415	0.0121	294850	0.0006	8078228	0.0159	16317874	0.032	58334787	0.1143	431372	0.0008	40960034	0.0802	0.313691	130574560	0.255847	0.313691	510361104	379786544	0.744153	1.96289e+07	2.57522e+07	5.2019e+07	16125788	1492	190594	244230	175	102	YES
Diptera	Drosophilidae	Drosophila	380	50	GCA_903684685.1	NA	none	none	126792960	5	22940839	7.36	98.6	0.7	99.3	0	0.7	100	1631890	0.0128	134383	0.001	1874429	0.0148	1733024	0.0137	6574028	0.0519	3615718	0.0285	3003195	0.0237	0.161752	18566667	0.146433	0.161752	126792960	108226293	0.853567	1.00888e+07	1.15883e+07	1.07141e+07	1420479	186	312359	26238	124	79	YES
Hymenoptera	Cynipidae	Synergus	238	438	GCA_904066005.1	NA	none	none	266041981	43	26320	4.42	93.9	0.9	94.8	3.2	2	100	1404552	0.0053	243226	0.0009	4201475	0.0158	29438365	0.1107	4148232	0.0156	3807491	0.0144	50309315	0.1891	0.537765	93552656	0.351646	0.537765	266041981	172489325	0.648354	2.61183e+06	7.81285e+06	5.47421e+07	28301231	208562	928572	286425	190	132	YES
Hymenoptera	Cynipidae	Synergus	246	437	GCA_904066015.1	NA	none	none	276059795	47	28940	4.46	94.3	1.4	95.7	2.5	1.8	100	734843	0.0027	98273	0.0004	6636737	0.0241	34522106	0.1251	4397757	0.0159	2199116	0.008	54339274	0.1968	0.527934	102928106	0.372847	0.527934	276059795	173131689	0.627153	1.39192e+06	1.25711e+07	6.53909e+07	32119627	132220	2270259	265921	220	143	YES
Diptera	Muscidae	Stomoxys	531	99	GCF_001015335.1	NA	short	short	971188624	204	11309	4.05	98.2	0.7	98.9	0.4	0.7	100	238149802	0.2452	9793997	0.0101	12710120	0.0131	34211181	0.0352	8907059	0.0092	167856393	0.1728	104406093	0.1075	0.18125	576034645	0.593123	0.18125	971188624	395153979	0.406877	1.31393e+09	7.01249e+07	1.88752e+08	34181356	2679	27146	775204	161	109	YES
Diptera	Drosophilidae	Drosophila	479	33	GCF_013340165.1	NA	long	pacbio	268012156	0	2609782	6.42	94.4	3.1	97.5	1.1	1.4	100	22082940	0.0824	54510	0.0002	53913710	0.2012	21094928	0.0787	8443626	0.0316	13072590	0.0488	16701891	0.0624	0.123385	135364195	0.505067	0.123385	268012156	132647961	0.494933	1.78976e+08	4.36956e+08	1.70969e+08	7599471	117	13495340	51789	336	147	YES
[truncated: 5 more columns]

## Sheet: Table S2. Repbase submissions
Table S2. Number of new insect families submitted to Repbase each year.
Year	Count
1995	17
1996	0
1997	0
1998	0
1999	6
2000	0
2001	0
2002	0
2003	0
2004	8
2005	1
2006	0
2007	0
2008	0
2009	1
2010	2
2011	2
2012	2
2013	1
2014	0
2015	6
2016	0
2017	1
2018	1
2019	5
2020	3
2021	0

## Sheet: Table S3. Repbase taxa
Table S3. Summary of repetitive element sequences in Repbase by taxonomic group and repetitive element category.
Order	Family	All sequences	LTRS	non-LTRs	DNA transposons
Archeognatha	Machilidae	1	0	0	1
Blattodea	Ectobiidae	6	0	0	0
Blattodea	Termitoidae/Kalotermitidae	2	0	1	1
Blattodea	Termitoidae/Rhinotermitidae	3	0	3	0
Coleoptera	Buprestidae	1	0	1	0
Coleoptera	Carabidae	1	0	0	0
Coleoptera	Coccinellidae	1	0	1	0
Coleoptera	Curculionidae	99	98	1	0
Coleoptera	Silphidae	1	0	0	0
Coleoptera	Tenebrionidae	97	28	25	29
Collembola	Entomobryidae	174	174	0	0
Collembola	Isotomidae	114	50	29	35
Collembola	Neanuridae	1	0	1	0
Dermaptera	Forficulidae	4	0	3	1
Diptera	Calliphoridae	2	0	0	1
Diptera	Cecidomyiidae	2	0	1	1
Diptera	Chironomidae	12	0	2	0
Diptera	Culicidae	5058	4020	632	238
Diptera	Drosophilidae	3395	1888	603	834
Diptera	Glossinidae	1	0	0	0
Diptera	Muscidae	2	0	0	2
Diptera	Psychodidae	2	0	2	0
Diptera	Sciaridae	30	28	1	0
Diptera	Simuliidae	1	0	0	0
Diptera	Tephritidae	7	2	0	4
Hemiptera	Aleyrodidae	447	222	73	71
Hemiptera	Anthocoridae	66	66	0	0
Hemiptera	Aphididae	361	28	21	121
Hemiptera	Cimicidae	7	2	0	5
Hemiptera	Pseudococcidae	1	0	0	0
Hemiptera	Reduviidae	296	56	43	172
Hymenoptera	Apidae	14	4	2	7
Hymenoptera	Braconidae	6	0	0	6
Hymenoptera	Encyrtidae	87	52	21	14
Hymenoptera	Eupelmidae	1	0	0	0
Hymenoptera	Figitidae	1	0	1	0
Hymenoptera	Formicidae	1096	545	49	458
Hymenoptera	Halictidae	1	0	1	0
Hymenoptera	Ichneumonidae	2	0	0	1
Hymenoptera	Megachilidae	31	22	9	0
Hymenoptera	Pteromalidae	241	136	46	37
Hymenoptera	Tenthredinidae	4	0	0	0
Hymenoptera	Trichogrammatidae	1	0	0	0
Lepidoptera	Bombycidae	108	30	43	27
Lepidoptera	Hesperiidae	43	43	0	0
Lepidoptera	Lymantriidae	3	2	1	0
Lepidoptera	Noctuidae	503	497	2	0
Lepidoptera	Nymphalidae	276	27	131	75
Lepidoptera	Papilionidae	221	37	130	30
Lepidoptera	Saturniidae	5	0	3	2
Lepidoptera	Sphingidae	123	122	1	0
Odonata	Libellulidae	9	0	6	0
Orthoptera	Acrididae	1133	196	452	405
Phasmatodea	Bacillidae	2	0	0	0
Phasmatodea	Phasmatidae	1	0	0	1
Phthiraptera	Pediculidae	1	0	1	0
Strepsiptera	Mengenillidae	9	0	0	9
